# Supplementary material for: N-Sulfonyl acetylketenimine as a highly reactive intermediate for the synthesis of N-sulfonyl amidines
Source: Royal Society of Chemistry journal article supplement (doi:10.1039/c8cc04699a), 2018-01-01

Supporting Online Material for

***N*-Sulfonyl acetylketeneimine as a highly reactive intermediate  
for the synthesis of *N*-sulfonyl amidines**

Weiguang Yang, Dayun Huang, Xiaobao Zeng, Dongping Luo, Xinyan Wang,\*  
Yuefei Hu\*

*Key Laboratory of Bioorganic Phosphorus Chemistry and Chemical Biology  
(Ministry of Education), Department of Chemistry, Tsinghua University, Beijing  
100084, P. R. China*

1. The structures of starting materials **2a-2h** and **10a-10h**.....S2
2. Preparation and characterizations of compounds **12a-12u**, **14**.....S3-S10
3. References..... S11
4. <sup>1</sup>H NMR and <sup>13</sup>C NMR spectra of compounds **12a-12u**, **14**.....S12-S55

## Structures of Starting Materials 2a-2h

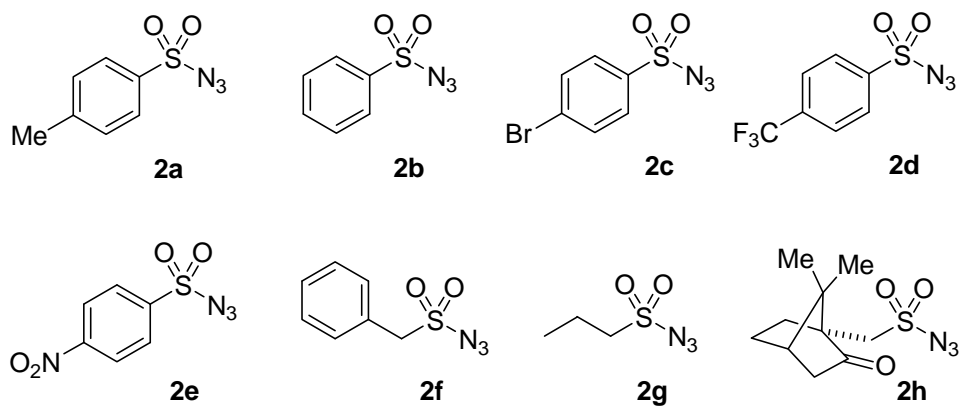

## Structures of Starting Materials 10a-10h

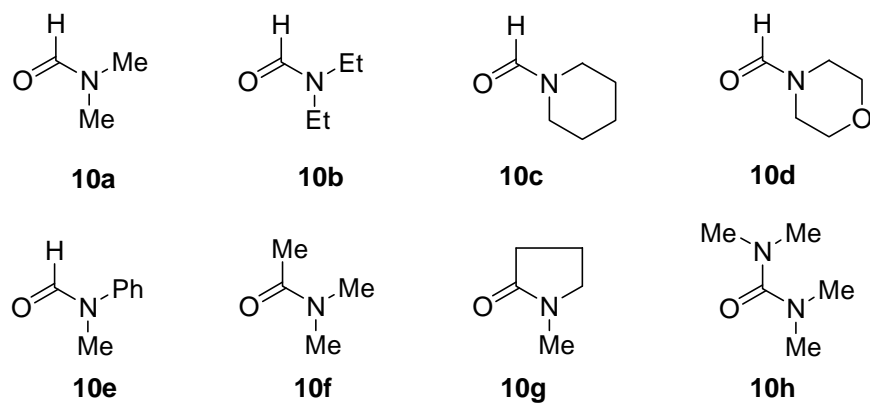

## Experimental Section

**General Methods:** All melting points were determined on a Yanaco melting point apparatus and are uncorrected. IR spectra were recorded as KBr pellets on a Nicolet FT-IR 5DX spectrometer. The  $^1\text{H}$  NMR (300 or 400 MHz) and  $^{13}\text{C}$  NMR (75 or 100 MHz) spectra were recorded on a JEOL JNM-ECA spectrometers 300 or 400 in  $\text{CDCl}_3$ . TMS was used as an internal reference and  $J$  values are given in Hz. HRMS were obtained on a Bruker micrOTOF-Q II spectrometer. PE is petroleum ether (60–90 °C). All starting materials **2a-2h** and **10a-10h** are known compounds. The compounds **2a-2c** and **10a-10h** were purchased directly and **2d-2h** were easily prepared according to the reported procedure (Pi, C; Cui, X.; Wu, Y. *J. Org. Chem.* **2015**, *80*, 7333.).

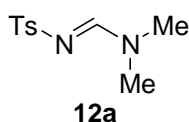

**A typical procedure for preparation of *N*-[(dimethylamino)methylene]-4-methylbenzenesulfonamide (**12a**).** To a stirred solution of 3-butyne-2-one (**9a**, 136 mg, 2 mmol) and CuI (19 mg, 0.1 mmol) in DMF (**10a**, 2 mL) was added  $\text{TsN}_3$  (**2a**, 197 mg, 1 mmol). After the mixture was heated under 60 °C for 15 min, it was cooled to room temperature. The system was extracted with EtOAc and washed with brine. After the organic layer was dried over  $\text{MgSO}_4$ , the solvent was evaporated on rotavapor. The residue was purified by a flash chromatography (silica gel, petroleum ether/ethyl acetate = 1:1) to give the pure product **12a** (219 mg, 97%) as white solid, mp 135–136 °C (lit.<sup>[1]</sup> mp 132–133 °C).  $^1\text{H}$  NMR (400 MHz,  $\text{CDCl}_3$ )  $\delta$  8.13 (s, 1H), 7.78 (d,  $J$  = 8.2 Hz, 2H), 7.26 (d,  $J$  = 8.2 Hz, 2H), 3.12 (s, 3H), 3.01 (s, 3H), 2.40 (s, 3H);  $^{13}\text{C}$  NMR (100 MHz,  $\text{CDCl}_3$ )  $\delta$  159.0, 142.4, 139.5, 129.3 (2C), 126.5 (2C), 41.4, 35.5, 21.5.

The products **12b-12t** were prepared by the similar procedure.

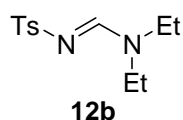

***N*-[(Diethylamino)methylene]-4-methylsulfonamide (12b).** 234 mg (92%), white solid, mp 76–77 °C (lit.<sup>[1]</sup> mp 77–78 °C); <sup>1</sup>H NMR (400 MHz, CDCl<sub>3</sub>) δ 8.14 (s, 1H), 7.76 (d, *J* = 8.2 Hz, 2H), 7.25 (d, *J* = 8.2 Hz, 2H), 3.47 (q, *J* = 7.3 Hz, 2H), 3.38 (d, *J* = 7.3 Hz, 2H), 2.40 (s, 3H), 1.25 (t, *J* = 7.3 Hz, 3H), 1.14 (t, *J* = 7.3 Hz, 3H); <sup>13</sup>C NMR (100 MHz, CDCl<sub>3</sub>) δ 158.0, 142.2, 139.7, 129.2 (2C), 126.3 (2C), 47.0, 40.8, 21.4, 14.5, 12.0.

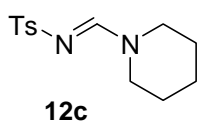

***N*-(1-Piperidinylmethylene)-4-methylsulfonamide (12c).** 253 mg (95%), white solid, mp 150–151 °C (lit.<sup>[1]</sup> mp 147–149 °C); <sup>1</sup>H NMR (400 MHz, CDCl<sub>3</sub>) δ 8.12 (s, 1H), 7.76 (d, *J* = 8.2 Hz, 2H), 7.25 (d, *J* = 8.2 Hz, 2H), 3.57 (t, *J* = 5.5 Hz, 2H), 3.40 (t, *J* = 5.5 Hz, 2H), 2.38 (s, 3H), 1.65–1.53 (m, 6H); <sup>13</sup>C NMR (100 MHz, CDCl<sub>3</sub>) δ 157.0, 142.0, 139.5, 129.0 (2C), 126.1 (2C), 51.6, 44.3, 26.1, 24.6, 23.6, 21.2.

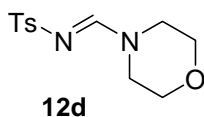

***N*-(4-Morpholinylmethylene)-4-methylsulfonamide (12d).** 188 mg (70%), white solid, mp 171–172 °C (lit.<sup>[1]</sup> mp 176–177 °C); <sup>1</sup>H NMR (400 MHz, CDCl<sub>3</sub>) δ 8.20 (s, 1H), 7.77 (d, *J* = 7.8 Hz, 2H), 7.27 (d, *J* = 7.8 Hz, 2H), 3.74 (t, *J* = 5.0 Hz, 2H), 3.67 (s, 4H), 3.49 (d, *J* = 5.0 Hz, 2H), 2.40 (s, 3H); <sup>13</sup>C NMR (100 MHz, CDCl<sub>3</sub>) δ 157.6, 142.7, 139.0, 129.4 (2C), 126.5 (2C), 66.8, 65.9, 50.3, 44.2, 21.5.

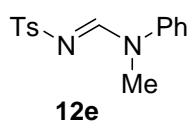

***N*-[(*N*-Methyl-*N*-phenylamino)methylene]-4-methylsulfonamide (12e).** 104

mg (36%), white solid, mp 117–118 °C (lit.<sup>[2]</sup> mp 108 °C); <sup>1</sup>H NMR (400 MHz, CDCl<sub>3</sub>) δ 8.56 (s, 1H), 7.82 (d, *J* = 8.3 Hz, 2H), 7.42 (t, *J* = 7.8 Hz, 2H), 7.33–7.28 (m, 3H), 7.19 (d, *J* = 8.2 Hz, 2H), 3.43 (s, 3H), 2.41 (s, 3H); <sup>13</sup>C NMR (100 MHz) δ 158.2, 143.0, 142.7, 138.8, 129.7 (2C), 129.3 (2C), 127.2, 126.6 (2C), 121.9 (2C), 35.9, 21.4.

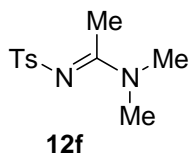

***N*-[(Dimethylamino)ethylidene]-4-methylsulfonamide (12f).** 125 mg (52%), white solid, mp 123–124 °C, (lit.<sup>[3]</sup> mp 122–123 °C); <sup>1</sup>H NMR (400 MHz, CDCl<sub>3</sub>) δ 7.82 (d, *J* = 8.2 Hz, 2H), 7.25 (d, *J* = 8.2 Hz, 2H), 3.08 (s, 3H), 3.07 (s, 3H), 2.48 (s, 3H), 2.39 (s, 3H); <sup>13</sup>C NMR (100 MHz, CDCl<sub>3</sub>) δ 165.8, 141.7, 141.1, 129.0 (2C), 126.1 (2C), 38.8, 38.7, 21.3, 17.8.

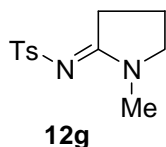

***N*-(1-Methylpyrrolidin-2-ylidene)-4-methylsulfonamide (12g).** 174 mg (69%), white solid, mp 127–128 °C (lit.<sup>[4]</sup> mp 145 °C); <sup>1</sup>H NMR (400 MHz, CDCl<sub>3</sub>) δ 7.81 (d, *J* = 8.3 Hz, 2H), 7.25 (d, *J* = 8.3 Hz, 2H), 3.45 (t, *J* = 7.3 Hz, 2H), 3.03 (t, *J* = 8.2 Hz, 2H), 2.97 (s, 3H), 2.40 (s, 3H), 2.08–2.01 (m, 2H); <sup>13</sup>C NMR (100 MHz, CDCl<sub>3</sub>) δ 169.8, 141.9, 140.5, 129.0 (2C), 126.4 (2C), 51.6, 31.9, 30.6, 21.3, 18.9.

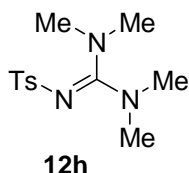

***N*-[Bis(dimethylamino)methylene]-4-methylsulfonamide (12h).** 204 mg (76%), yellow solid, mp 139–140 °C (lit.<sup>[5]</sup> mp 142–144 °C); <sup>1</sup>H NMR (400 MHz, CDCl<sub>3</sub>) δ 7.81 (d, *J* = 8.2 Hz, 2H), 7.22 (d, *J* = 7.8 Hz, 2H), 2.93 (s, 12H), 2.38 (s, 3H); <sup>13</sup>C

NMR (100 MHz, CDCl<sub>3</sub>)  $\delta$  161.8, 143.1, 140.9, 128.9 (2C), 125.5 (2C), 40.4 (4C), 21.3.

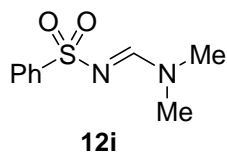

***N*-[(Dimethylamino)methylene]benzenesulfonamide (12i).** 197 mg (93%), white solid, mp 130–131 °C (lit.<sup>[6]</sup> mp 128–129 °C); <sup>1</sup>H NMR (400 MHz, CDCl<sub>3</sub>)  $\delta$  8.15 (s, 1H), 7.89 (d, *J* = 7.6 Hz, 2H), 7.50–7.44 (m, 3H), 3.12 (s, 3H), 3.01 (s, 3H); <sup>13</sup>C NMR (100 MHz, CDCl<sub>3</sub>)  $\delta$  159.1, 142.3, 131.7, 128.6 (2C), 126.2 (2C), 41.4, 35.4.

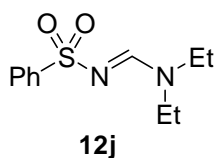

***N*-[(Diethylamino)methylene]-benzenesulfonamide (12j).** 199 mg (83%), white solid, mp 75–76 °C (lit.<sup>[11]</sup> mp 73–75 °C); <sup>1</sup>H NMR (400 MHz, CDCl<sub>3</sub>)  $\delta$  8.16 (s, 1H), 7.88 (d, *J* = 7.2 Hz, 2H), 7.52–7.31 (m, 3H), 3.47 (q, *J* = 7.3 Hz, 2H), 3.38 (q, *J* = 6.9 Hz, 2H), 1.24 (t, *J* = 7.3 Hz, 3H), 1.13 (t, *J* = 6.9 Hz, 3H); <sup>13</sup>C NMR (100 MHz, CDCl<sub>3</sub>)  $\delta$  158.0, 142.5, 131.5, 128.5 (2C), 126.1 (2C), 46.9, 40.8, 14.3, 11.9.

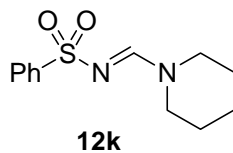

***N*-(1-Piperidinylmethylene)-benzenesulfonamide (12k).** 229 mg (91%), white solid, mp 149–150 °C (lit.<sup>[7]</sup> no mp was reported); <sup>1</sup>H NMR (400 MHz, CDCl<sub>3</sub>)  $\delta$  8.14 (s, 1H), 7.89 (d, *J* = 7.6 Hz, 2H), 7.51–7.44 (m, 3H), 3.60 (t, *J* = 5.5 Hz, 2H), 3.42 (d, *J* = 5.0 Hz, 2H), 1.67–1.66 (m, 4H), 1.59–1.57 (m, 2H); <sup>13</sup>C NMR (100 MHz, CDCl<sub>3</sub>)  $\delta$  157.3, 142.5, 131.6, 128.6 (2C), 126.3 (2C), 51.8, 44.6, 26.3, 24.7, 23.8.

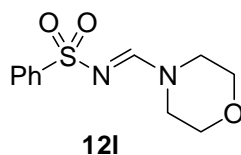

***N*-(4-Morpholinylmethylene)benzenesulfonamide (12l).** 191 mg (75%), white solid, mp 137–138 °C (lit.<sup>[7]</sup> no mp was reported); <sup>1</sup>H NMR (400 MHz, CDCl<sub>3</sub>) δ 8.24 (s, 1H), 7.89 (d, *J* = 7.4 Hz, 2H), 7.55–7.46 (m, 3H), 3.74 (t, *J* = 4.6 Hz, 2H), 3.67 (s, 4H), 3.52 (t, *J* = 5.0 Hz, 2H); <sup>13</sup>C NMR (100 MHz, CDCl<sub>3</sub>) δ 157.7, 141.9, 131.9, 128.7 (2C), 126.4 (2C), 66.7, 65.8, 50.2, 44.1.

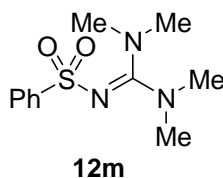

***N*-[Bis(dimethylamino)methylene]benzenesulfonamide (12m).** 163 mg (64%), white solid, mp 130–131 °C (lit.<sup>[8]</sup> no mp); <sup>1</sup>H NMR (400 MHz, CDCl<sub>3</sub>) δ 7.93–7.91 (m, 2H), 7.44–7.42 (m, 3H), 2.92 (s, 12H); <sup>13</sup>C NMR (100 MHz, CDCl<sub>3</sub>) δ 161.7, 145.7, 130.5, 128.2 (2C), 125.3 (2C), 40.3 (4C).

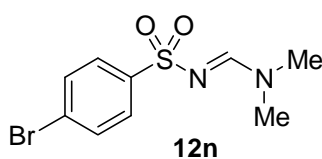

***N*-[Bis(dimethylamino)methylene]-4-bromobenzenesulfonamide (12n).** 253 mg (87%), white solid, mp 139–141 °C (lit.<sup>[9]</sup> mp 139–140 °C); <sup>1</sup>H NMR (400 MHz, CDCl<sub>3</sub>) δ 8.14 (s, 1H), 7.75 (d, *J* = 8.7 Hz, 2H), 7.59 (d, *J* = 8.2 Hz, 2H), 3.15 (s, 3H), 3.02 (s, 3H); <sup>13</sup>C NMR (100 MHz, CDCl<sub>3</sub>) δ 159.1, 141.4, 131.7 (2C), 127.9 (2C), 126.4, 41.4, 35.4.

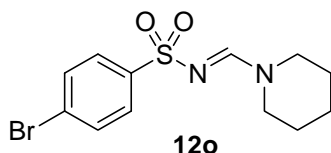

***N*-(1-Piperidinylmethylene)-4-bromobenzenesulfonamide (12o).** 298 mg (90%), white solid, mp 132–133 °C; IR (KBr)  $\nu$  2983, 2868, 1624, 1311, 1140  $\text{cm}^{-1}$ ;  $^1\text{H}$  NMR (400 MHz,  $\text{CDCl}_3$ )  $\delta$  8.12 (s, 1H), 7.75 (d,  $J = 8.2$  Hz, 2H), 7.59 (d,  $J = 7.8$  Hz, 2H), 3.59 (t,  $J = 6.0$  Hz, 2H), 3.44 (t,  $J = 5.0$  Hz, 2H), 1.68–1.67 (m, 4H), 1.60–1.55 (m, 2H);  $^{13}\text{C}$  NMR (100 MHz,  $\text{CDCl}_3$ )  $\delta$  157.2, 141.5, 131.7 (2C), 127.9 (2C), 126.2, 51.8, 44.5, 26.2, 24.7, 23.7. HRMS (ESI-TOF) ( $m/z$ ): calcd for  $\text{C}_{12}\text{H}_{15}\text{BrN}_2\text{O}_2\text{S}$ ,  $[\text{M}+\text{Na}]^+$  352.9930; found 352.9934.

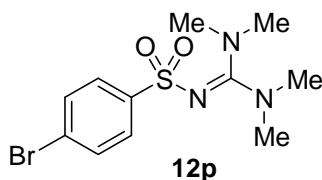

***N*-[Bis(dimethylamino)methylene]-4-bromo-benzenesulfonamide (12p).** 250 mg (75%), white solid, mp 153–154 °C (lit.<sup>[10]</sup> no mp); IR (KBr)  $\nu$  2952, 2864, 1611, 1463, 1158  $\text{cm}^{-1}$ ;  $^1\text{H}$  NMR (400 MHz,  $\text{CDCl}_3$ )  $\delta$  7.80 (d,  $J = 8.7$  Hz, 2H), 7.58–7.56 (m, 2H), 2.92 (s, 12H);  $^{13}\text{C}$  NMR (100 MHz,  $\text{CDCl}_3$ )  $\delta$  161.6, 144.8, 131.3 (2C), 127.1 (2C), 124.9, 40.3 (4C). HRMS (ESI-TOF) ( $m/z$ ): calcd for  $\text{C}_{11}\text{H}_{16}\text{BrN}_3\text{O}_2\text{S}$ ,  $[\text{M}+\text{Na}]^+$  356.0039; found 356.0036.

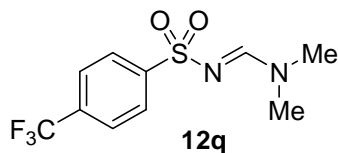

***N,N*-dimethyl-*N'*-((4-(trifluoromethyl)phenyl)sulfonyl)formimidamide (12q).** 207 mg (74%), White solid, mp 167–168 °C (lit.<sup>[11]</sup> no report);  $^1\text{H}$  NMR (400 MHz,  $\text{DMSO}-d_6$ )  $\delta$  8.27 (s, 1H), 8.00 (d,  $J = 8.2$  Hz, 2H), 7.89 (d,  $J = 8.7$  Hz, 2H), 3.16 (s, 3H), 2.92 (s, 3H);  $^{13}\text{C}$  NMR (100 MHz,  $\text{DMSO}-d_6$ )  $\delta$  160.2, 146.9, 131.6 (q,  $J = 31.5$



Hz, 1C), 126.9 (2C), 126.2 (q,  $J = 2.9$  Hz, 2C), 122.6 (q,  $J = 271.7$  Hz, 1C), 41.0, 35.2.

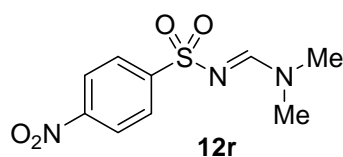

***N*-[(Dimethylamino)methylene]-4-nitrobenzenesulfonamide (12r).** 141 mg (55%), white solid, mp 197–199 °C (lit.<sup>[11]</sup> mp 197–201 °C); <sup>1</sup>H NMR (400 MHz, CDCl<sub>3</sub>)  $\delta$  8.31 (d,  $J = 8.7$  Hz, 2H), 8.17 (s, 1H), 8.08 (d,  $J = 8.7$  Hz, 2H), 3.19 (s, 3H), 3.06 (s, 3H); <sup>13</sup>C NMR (100 MHz, CDCl<sub>3</sub>)  $\delta$  159.4, 149.5, 148.1, 127.8 (2C), 124.0 (2C), 41.7, 35.7.

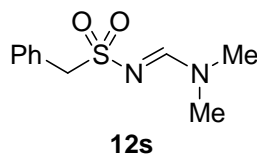

***N*-[(Dimethylamino)methylene]-benzylsulfonamide (12s).** 99 mg (44%), white solid, mp 117–118 °C (lit.<sup>[12]</sup> 135–137 °C); <sup>1</sup>H NMR (300 MHz, CDCl<sub>3</sub>)  $\delta$  7.50 (s, 1H), 7.36–7.28 (m, 5H), 4.26 (s, 2H), 2.99 (s, 3H), 2.93 (s, 3H); <sup>13</sup>C NMR (75 MHz, CDCl<sub>3</sub>)  $\delta$  160.2, 130.9 (2C), 130.2, 128.3 (2C), 128.2, 59.6, 41.0, 35.2.

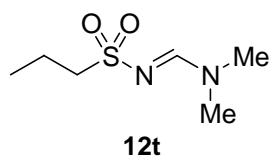

***N*-[(Dimethylamino)methylene]propylsulfonamide (12t).** 75 mg (42%), colorless oil; IR (KBr)  $\nu$  2968, 2822, 1633, 1281, 1120 cm<sup>-1</sup>; <sup>1</sup>H NMR (300 MHz, CDCl<sub>3</sub>)  $\delta$  8.04 (s, 1H), 3.13 (s, 3H), 3.04 (s, 3H), 3.01–2.96 (m, 2H), 1.86–1.78 (m, 2H), 1.04 (t,  $J = 7.2$  Hz, 3H); <sup>13</sup>C NMR (75 MHz, CDCl<sub>3</sub>)  $\delta$  159.3, 55.5, 41.2, 35.2, 17.3, 12.9. HRMS (ESI-TOF) ( $m/z$ ): calcd for C<sub>6</sub>H<sub>14</sub>N<sub>2</sub>O<sub>2</sub>S, [M+Na]<sup>+</sup> 201.0668; found 201.0665.

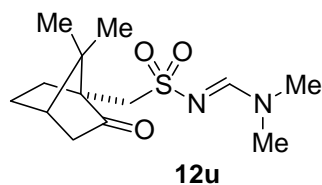

**(1R)-N-[(Dimethylamino)methylene]camphorsulfonamide (12u).** 212 mg (74%), white solid, mp 108–109 °C; IR (KBr)  $\nu$  3452, 2961, 2889, 1734, 1627, 1297, 1137  $\text{cm}^{-1}$ ;  $^1\text{H}$  NMR (300 MHz,  $\text{CDCl}_3$ )  $\delta$  8.04 (s, 1H), 3.46 (d,  $J = 1.4$  Hz, 1H), 3.16 (s, 3H), 3.02 (s, 3H), 2.96 (d,  $J = 1.4$  Hz, 1H), 2.67–2.68 (m, 1H), 2.35 (d,  $J = 1.9$  Hz, 1H), 2.09–2.00 (m, 2H), 1.91 (d,  $J = 1.8$  Hz, 1H), 1.78–1.71 (m, 1H), 1.45–1.38 (m, 1H), 1.12 (s, 3H), 0.86 (s, 3H);  $^{13}\text{C}$  NMR (75 MHz,  $\text{CDCl}_3$ )  $\delta$  215.1, 159.6, 58.3, 50.6, 47.8, 42.5, 42.4, 41.2, 35.2, 26.8, 24.6, 19.8, 19.6. HRMS (ESI-TOF) ( $m/z$ ): calcd for  $\text{C}_{13}\text{H}_{22}\text{N}_2\text{O}_3\text{S}$ ,  $[\text{M}+\text{Na}]^+$  309.1243; found 309.1246.

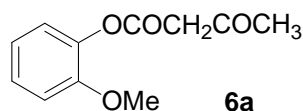

**Preparation of 2-methoxyphenylacetoacetate (14).** To a stirred solution of 3-butyne-2-one (68 mg, 1 mmol), 2-methoxyphenol (124 mg, 1 mmol) and  $\text{CuI}$  (19 mg, 0.1 mmol) in DMF (2 mL) was added methanesulfonyl azide (171 mg, 1.4 mmol). The mixture was heated under 50 °C for 1 h and then cooled to room temperature. The system was extracted with ethyl acetate and brine. After the organic layer was dried over  $\text{MgSO}_4$ , removal of the solvent under vacuum gave the crude product as a residue, which was purified by a flash chromatography (silica gel, PE : EtOAc = 2 : 1) to give 139 mg of the product **14** (67%) as a colorless oil. It was a mixture with enol structure (6:1) (lit.<sup>[13]</sup> mp 62–63 °C);  $^1\text{H}$  NMR (300 MHz,  $\text{CDCl}_3$ )  $\delta$  11.83 (s, 0.18H), 7.26–7.19 (m, 1.6H), 7.08–7.05 (m, 1.16H), 6.98–6.95 (m, 2.41H), 5.29 (s, 0.19H), 3.83 (s, 0.5H), 3.82 (s, 3H), 3.68 (s, 2H), 2.38 (s, 3H), 2.03 (s, 0.5H) [peaks for the major product: 7.26–7.19 (m, 1H), 7.08–7.05 (m, 1H), 6.98–6.92 (m, 2H), 3.83 (s, 3H), 3.68 (s, 2H), 2.38 (s, 3H)].  $^{13}\text{C}$  NMR (75 MHz,  $\text{CDCl}_3$ )  $\delta$  199.9, 165.1, 150.8, 139.3, 127.2, 122.6, 120.7, 112.4, 55.7, 49.8, 29.9.

## References:

1. Xu, X.; Ma, L.; Ye, N.; Weng, B. *J. Am. Chem. Soc.* **2008**, *130*, 14048–14049.
2. Jakobsen, P.; Treppendahl, S. *Tetrahedron* **1977**, *33*, 3137–3140.
3. Sevast'yanov, V. N.; Abrazhanova, E. A.; Skripets, V. I. *Voprosy Khimii i Khimicheskoi Tekhnologii*. **1983**, *72*, 82–84.
4. Ahuja, P.; Singh, J.; Asthana, M. B.; Sardana, V.; Anand, N. *Indian J. Chem., Sect. B: Org. Chem. Incl. Med. Chem.* **1989**, *28*, 1034–1038.
5. Qi, Y.; Gao, H.; Yang, M.; Xia, C.-G.; Suo, J. *Synth. Commun.* **2003**, *33*, 1073–1079.
6. Derkach, N. Y.; Barashenkov, G. G.; Slyusarenko, E. I. *Zhurnal Organicheskoi Khimii*, **1982**, *18*, 70–78.
7. Krasnov, V. L.; Vasyanina, G. I.; Bodrikov, I. V. *Zhurnal Organicheskoi Khimii*, **1991**, *27*, 1552–1556.
8. Kessler, H.; Leibfritz, D.; Burk, C. *Tetrahedron* **1970**, 1805–1820.
9. Dudutiene, V.; Asta, Z.; Alexey, S.; Joana, G.; David, T. *Bioorg. Med. Chem.* **2013**, *21*, 2093–2106.
10. Munakata, T.; Hasegawa, H.; Furuta, T. *Jpn. Tokkyo Koho*. **1970**, JP 45017680 B4 19700618.
11. Chen, S.; Wan, X. *Org. Lett.* **2011**, *13*, 6152–6155.
12. Kresze, G.; Albrecht, R. *Angew. Chem.* **1962**, *74*, 781–782; *Angew. Chem. Int. Ed.* **1962**, *1*, 595–596.
13. Rall, K. B.; Perekalin, V. V. *Zhurnal Obshchei Khimii*. **1955**, *25*, 276–281.

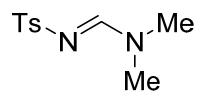

**12a**,  $^1\text{H}$  NMR (400 MHz,  $\text{CDCl}_3$ )

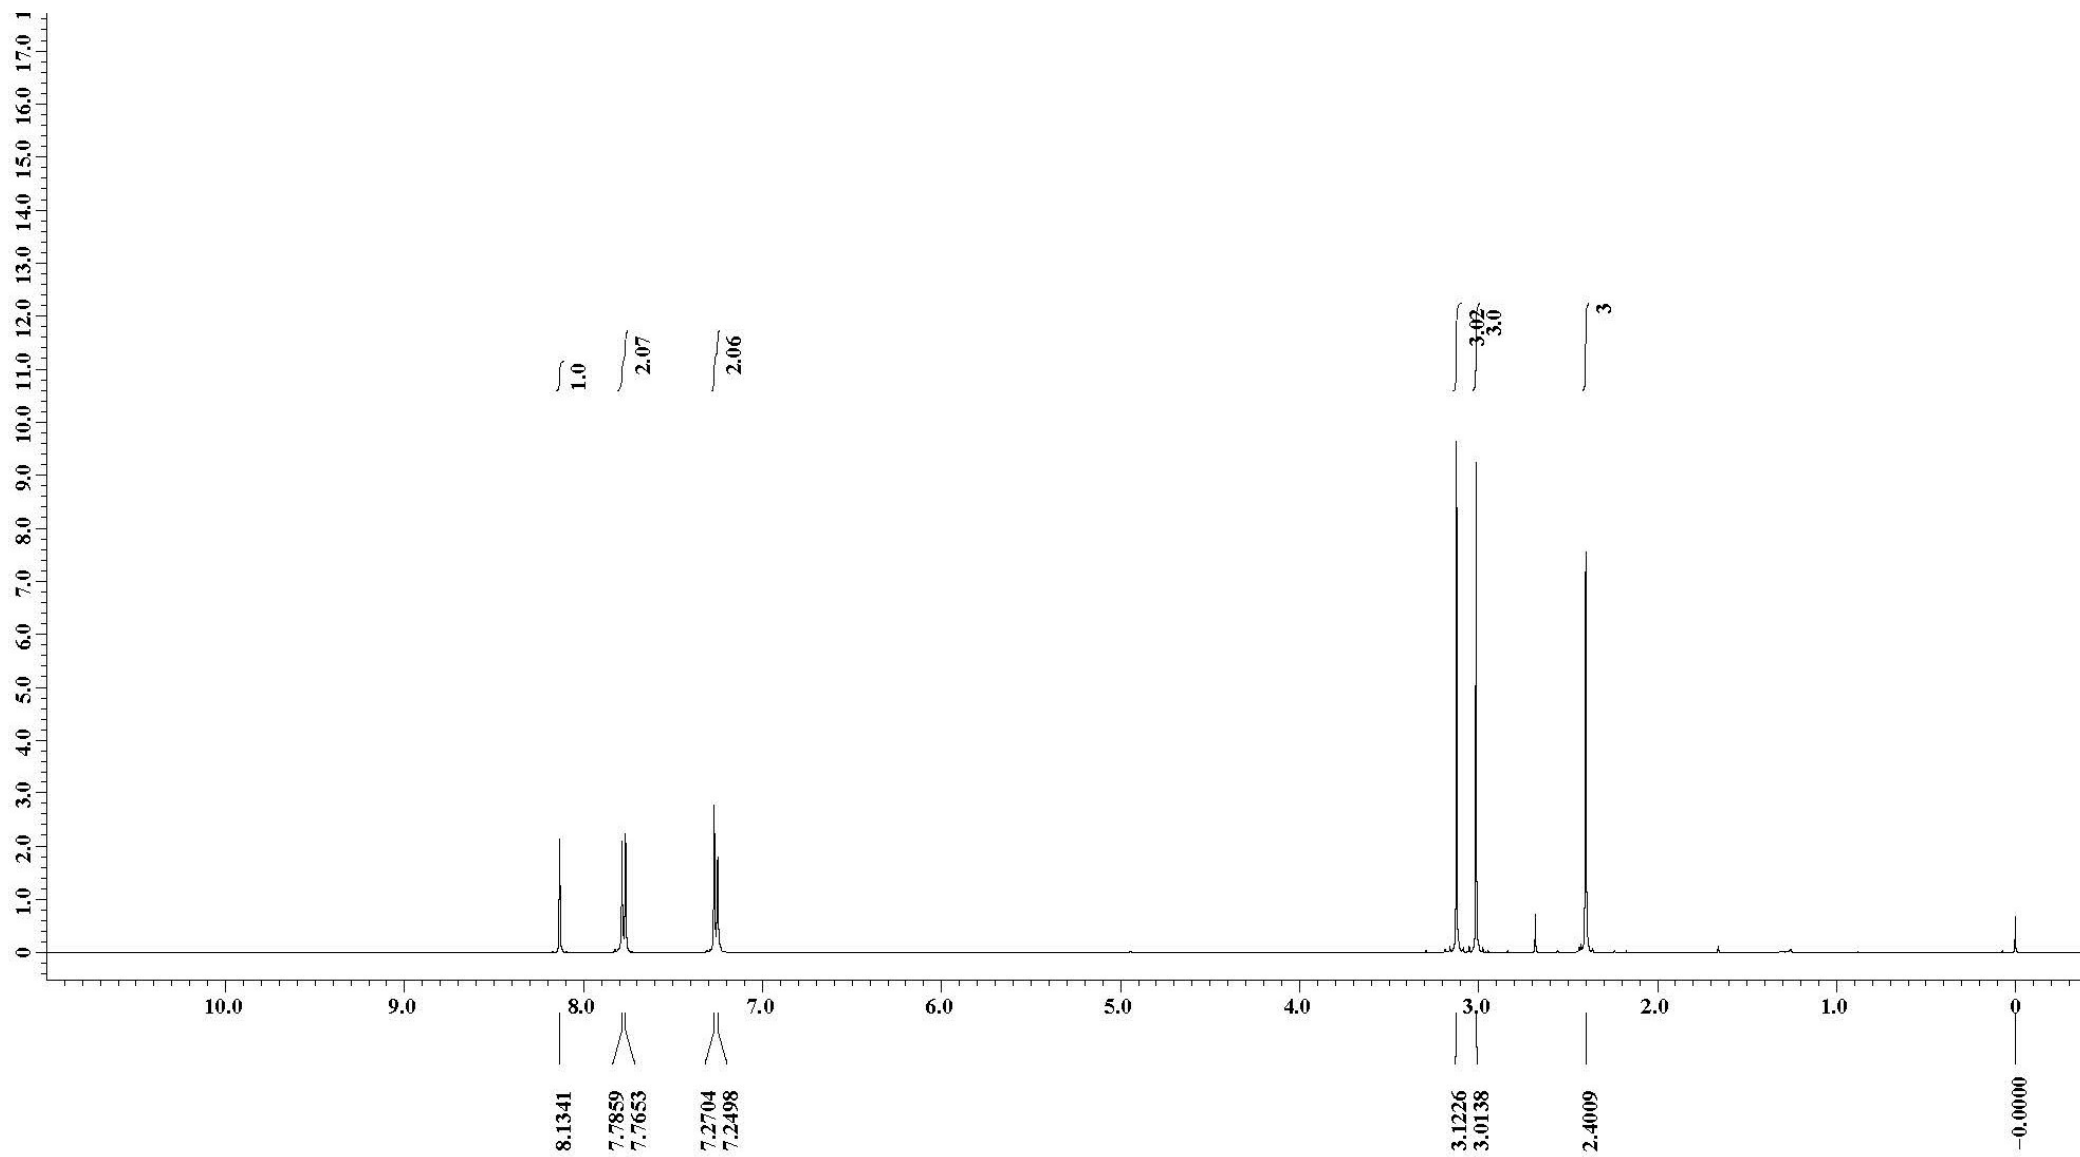

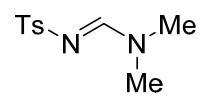

**12a**,  $^{13}\text{C}$  NMR (100 MHz,  $\text{CDCl}_3$ )

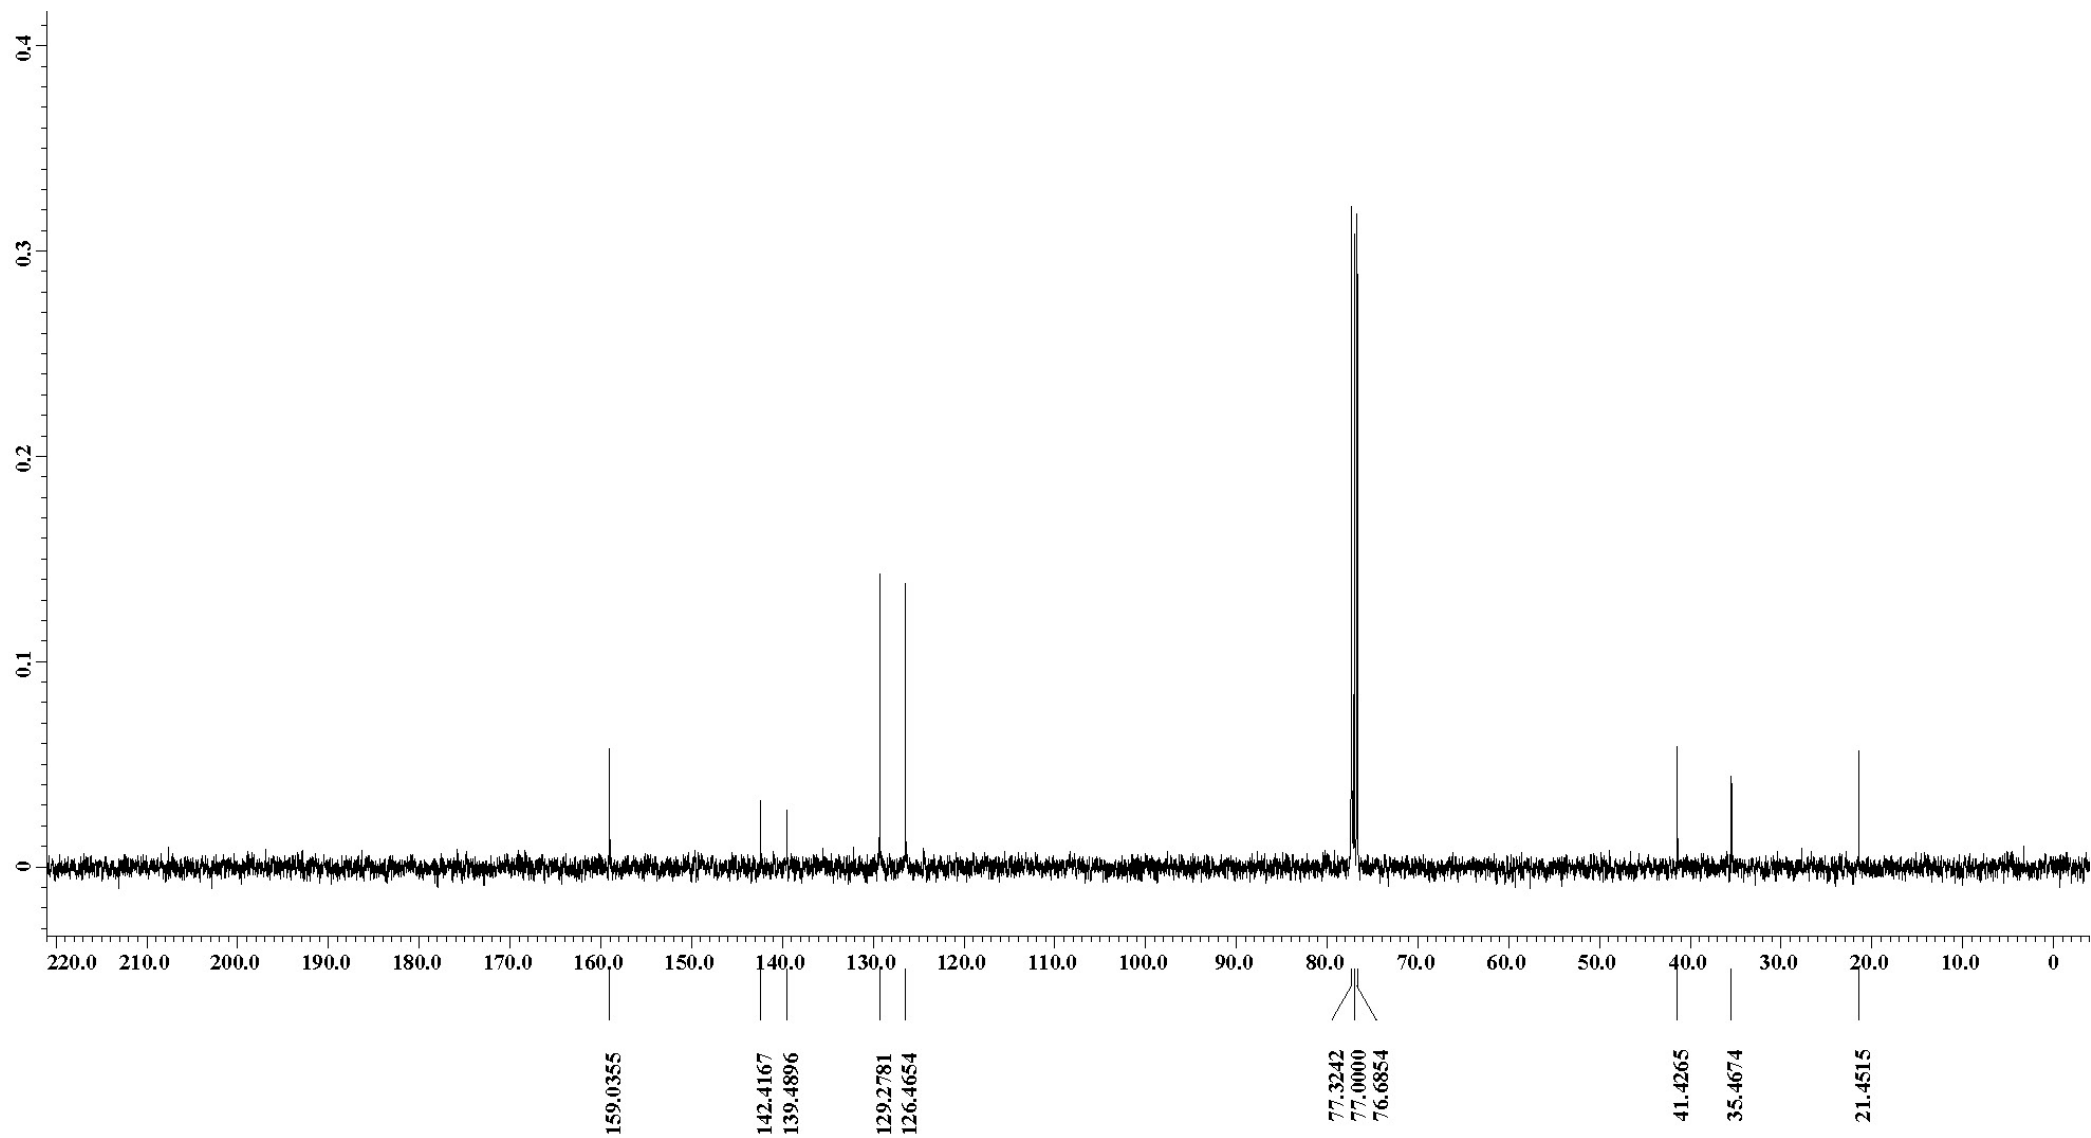

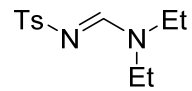

**12b**,  $^1\text{H}$  NMR (400 MHz,  $\text{CDCl}_3$ )

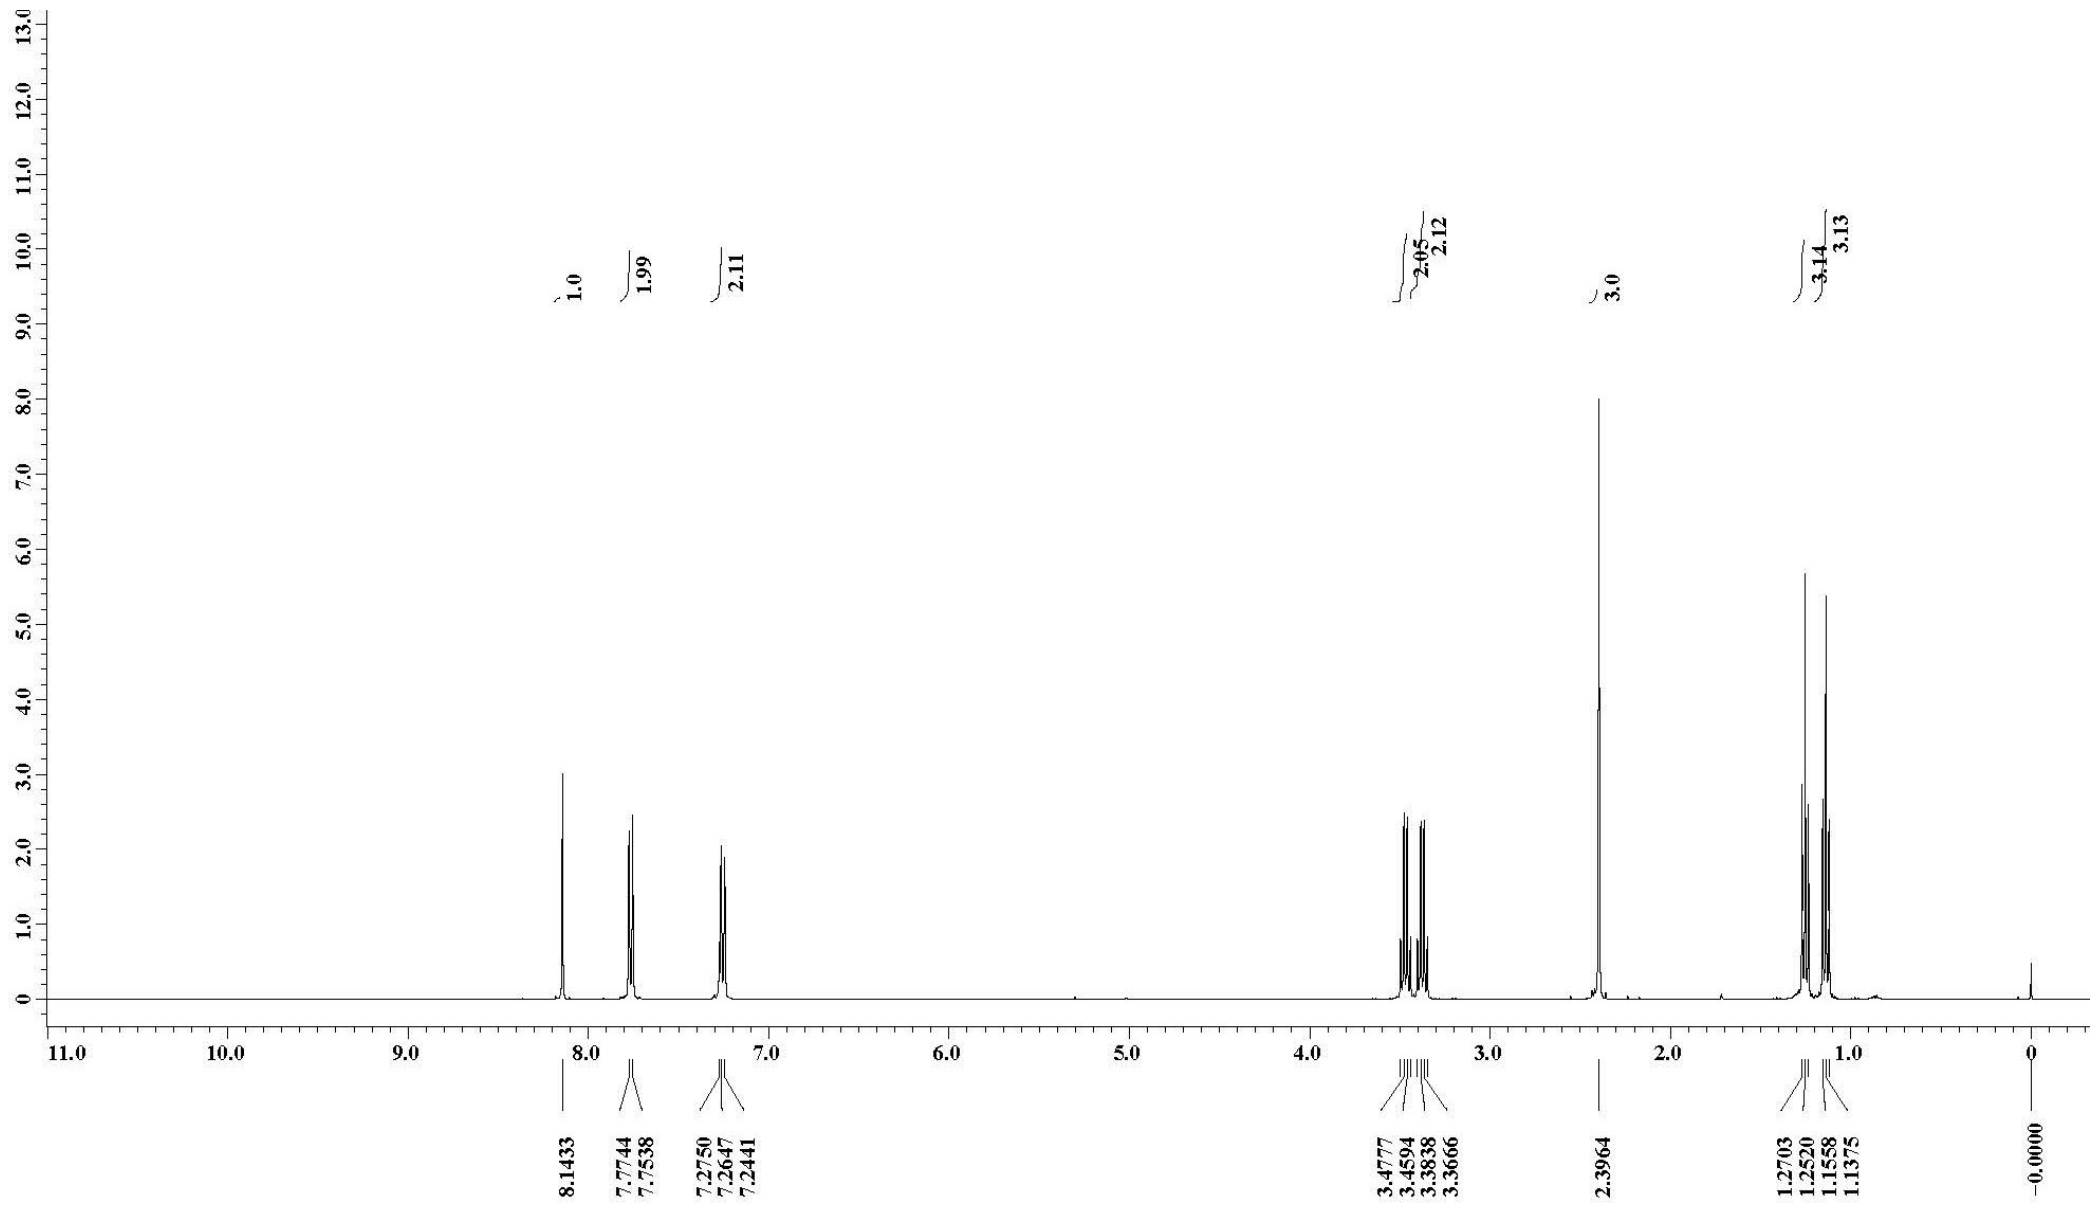

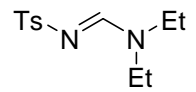

**12b**,  $^{13}\text{C}$  NMR (100 MHz,  $\text{CDCl}_3$ )

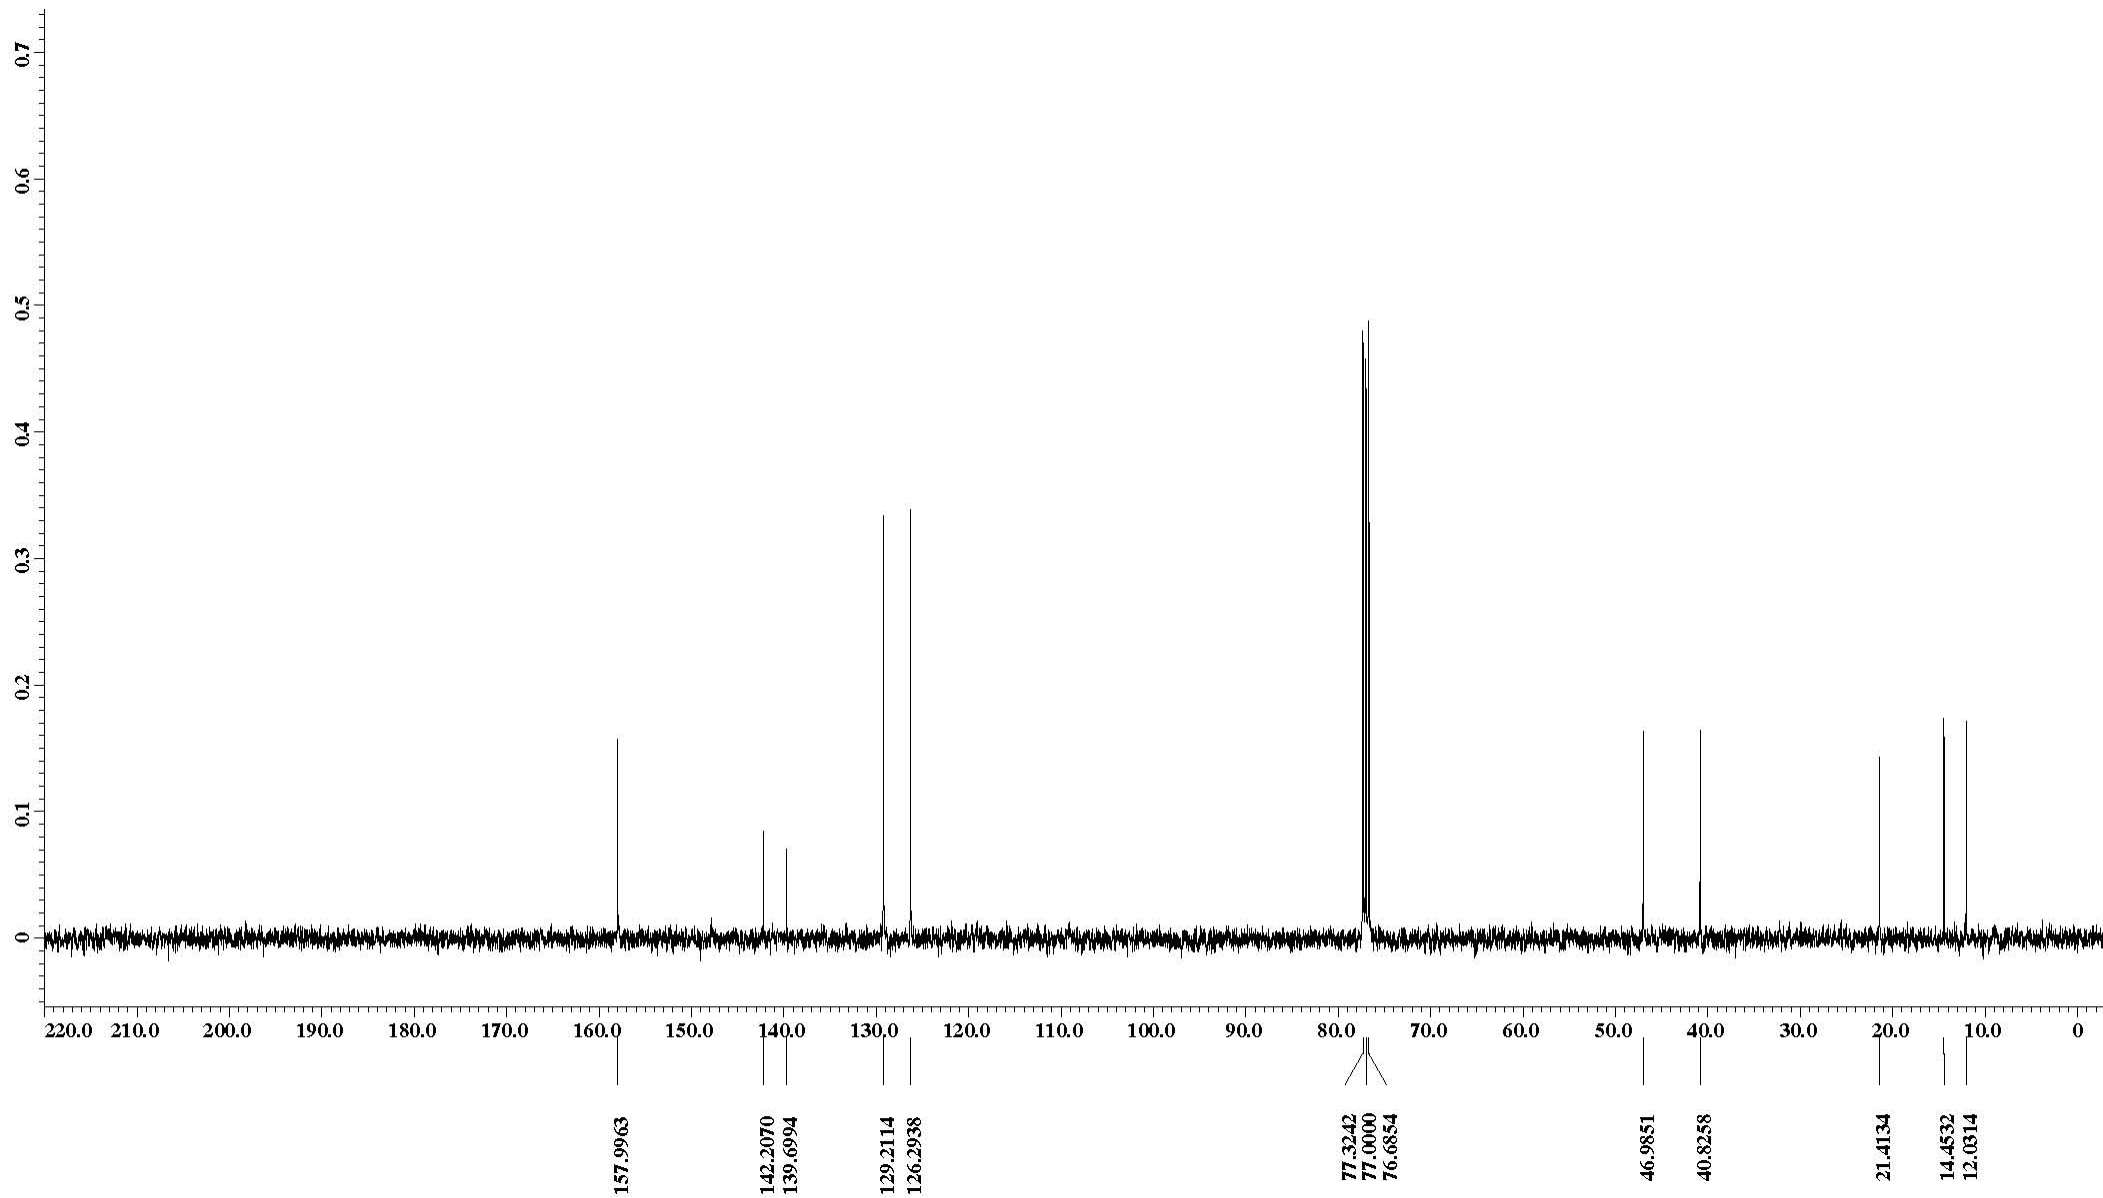

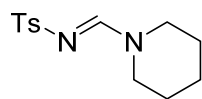

**12c**,  $^1\text{H}$  NMR (400 MHz,  $\text{CDCl}_3$ )

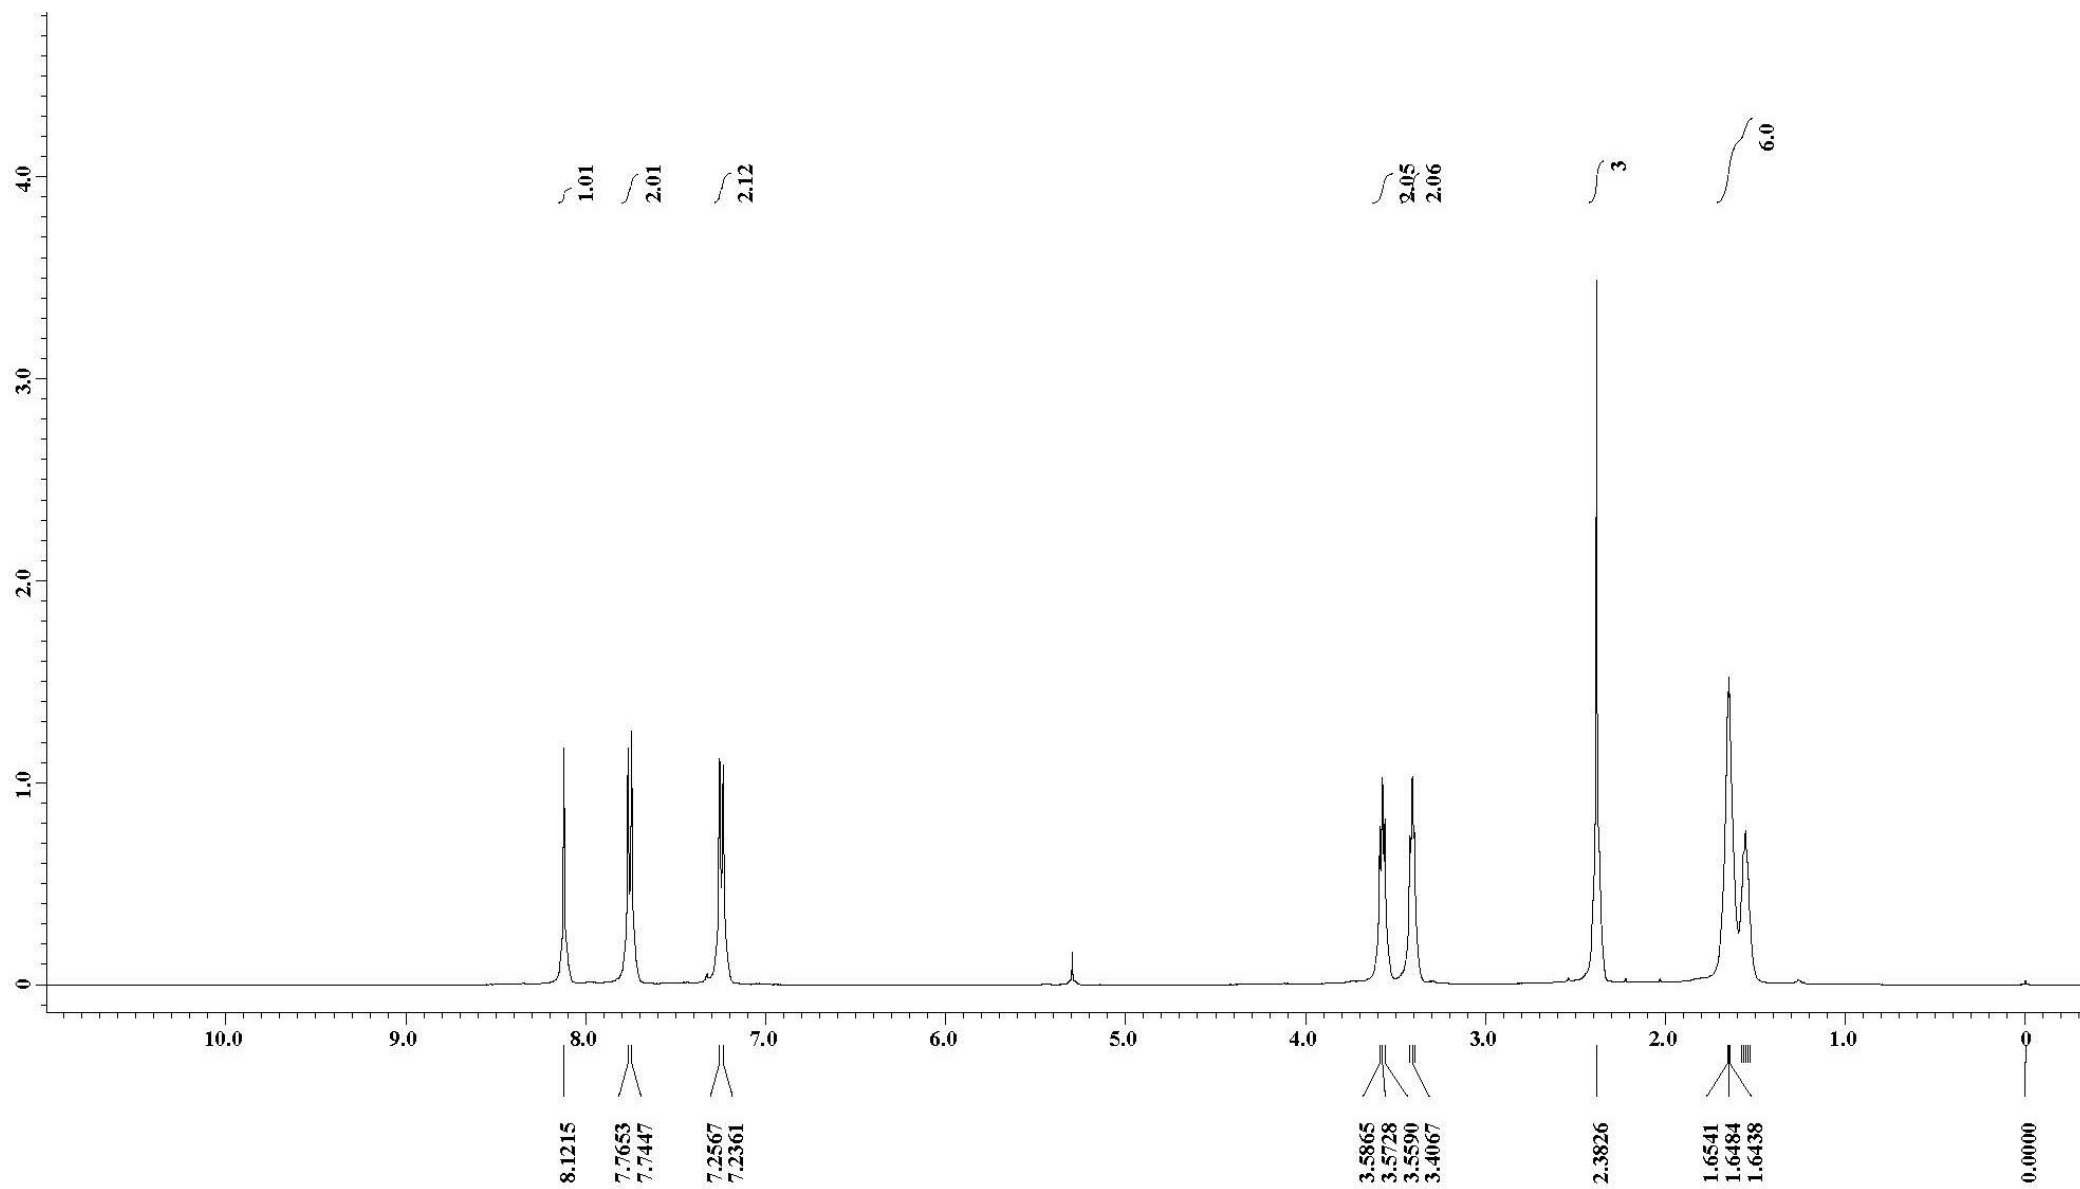



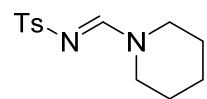

**12c**,  $^{13}\text{C}$  NMR (100 MHz,  $\text{CDCl}_3$ )

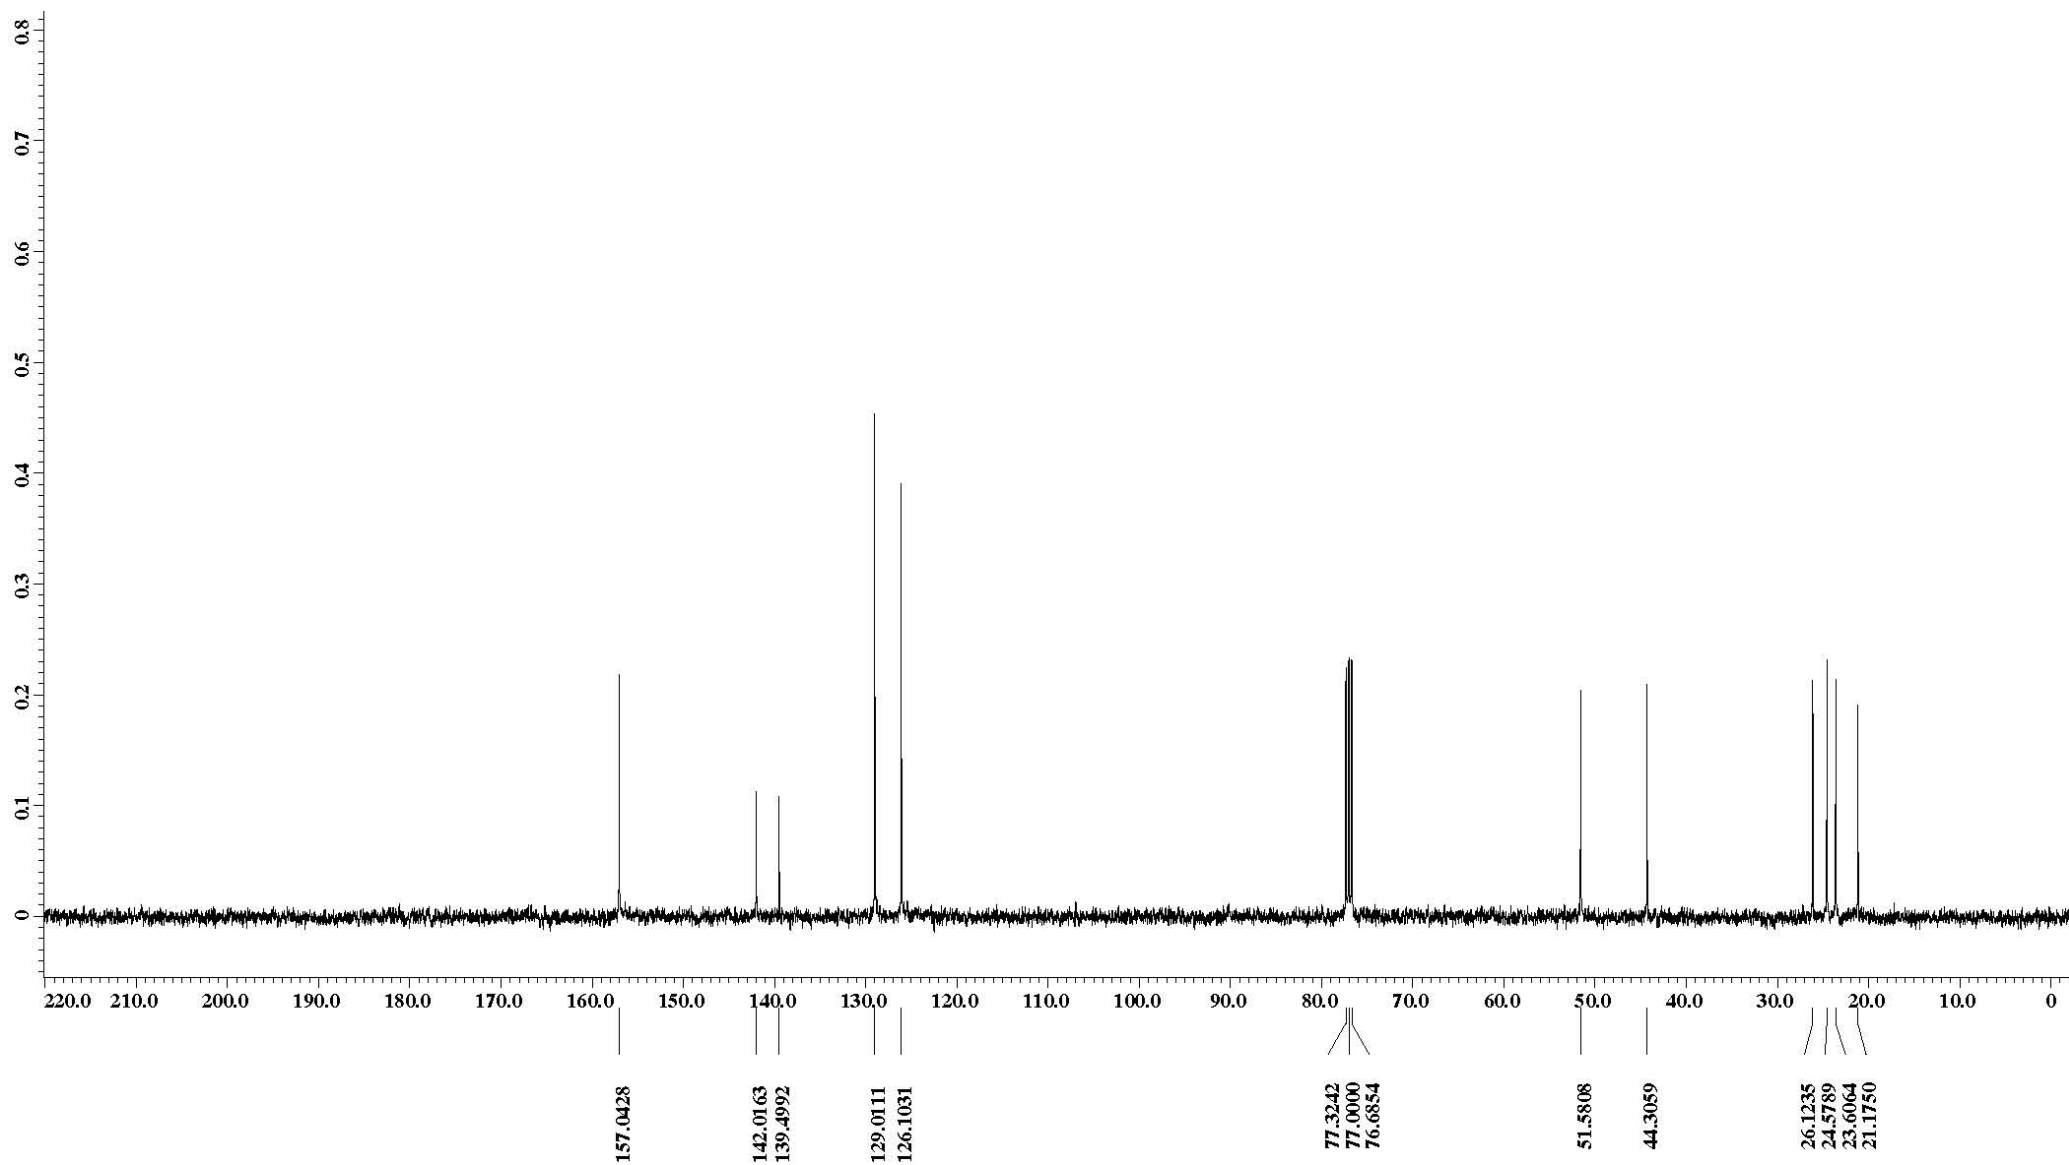

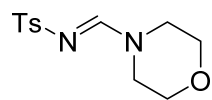

**12d**,  $^1\text{H}$  NMR (400 MHz,  $\text{CDCl}_3$ )

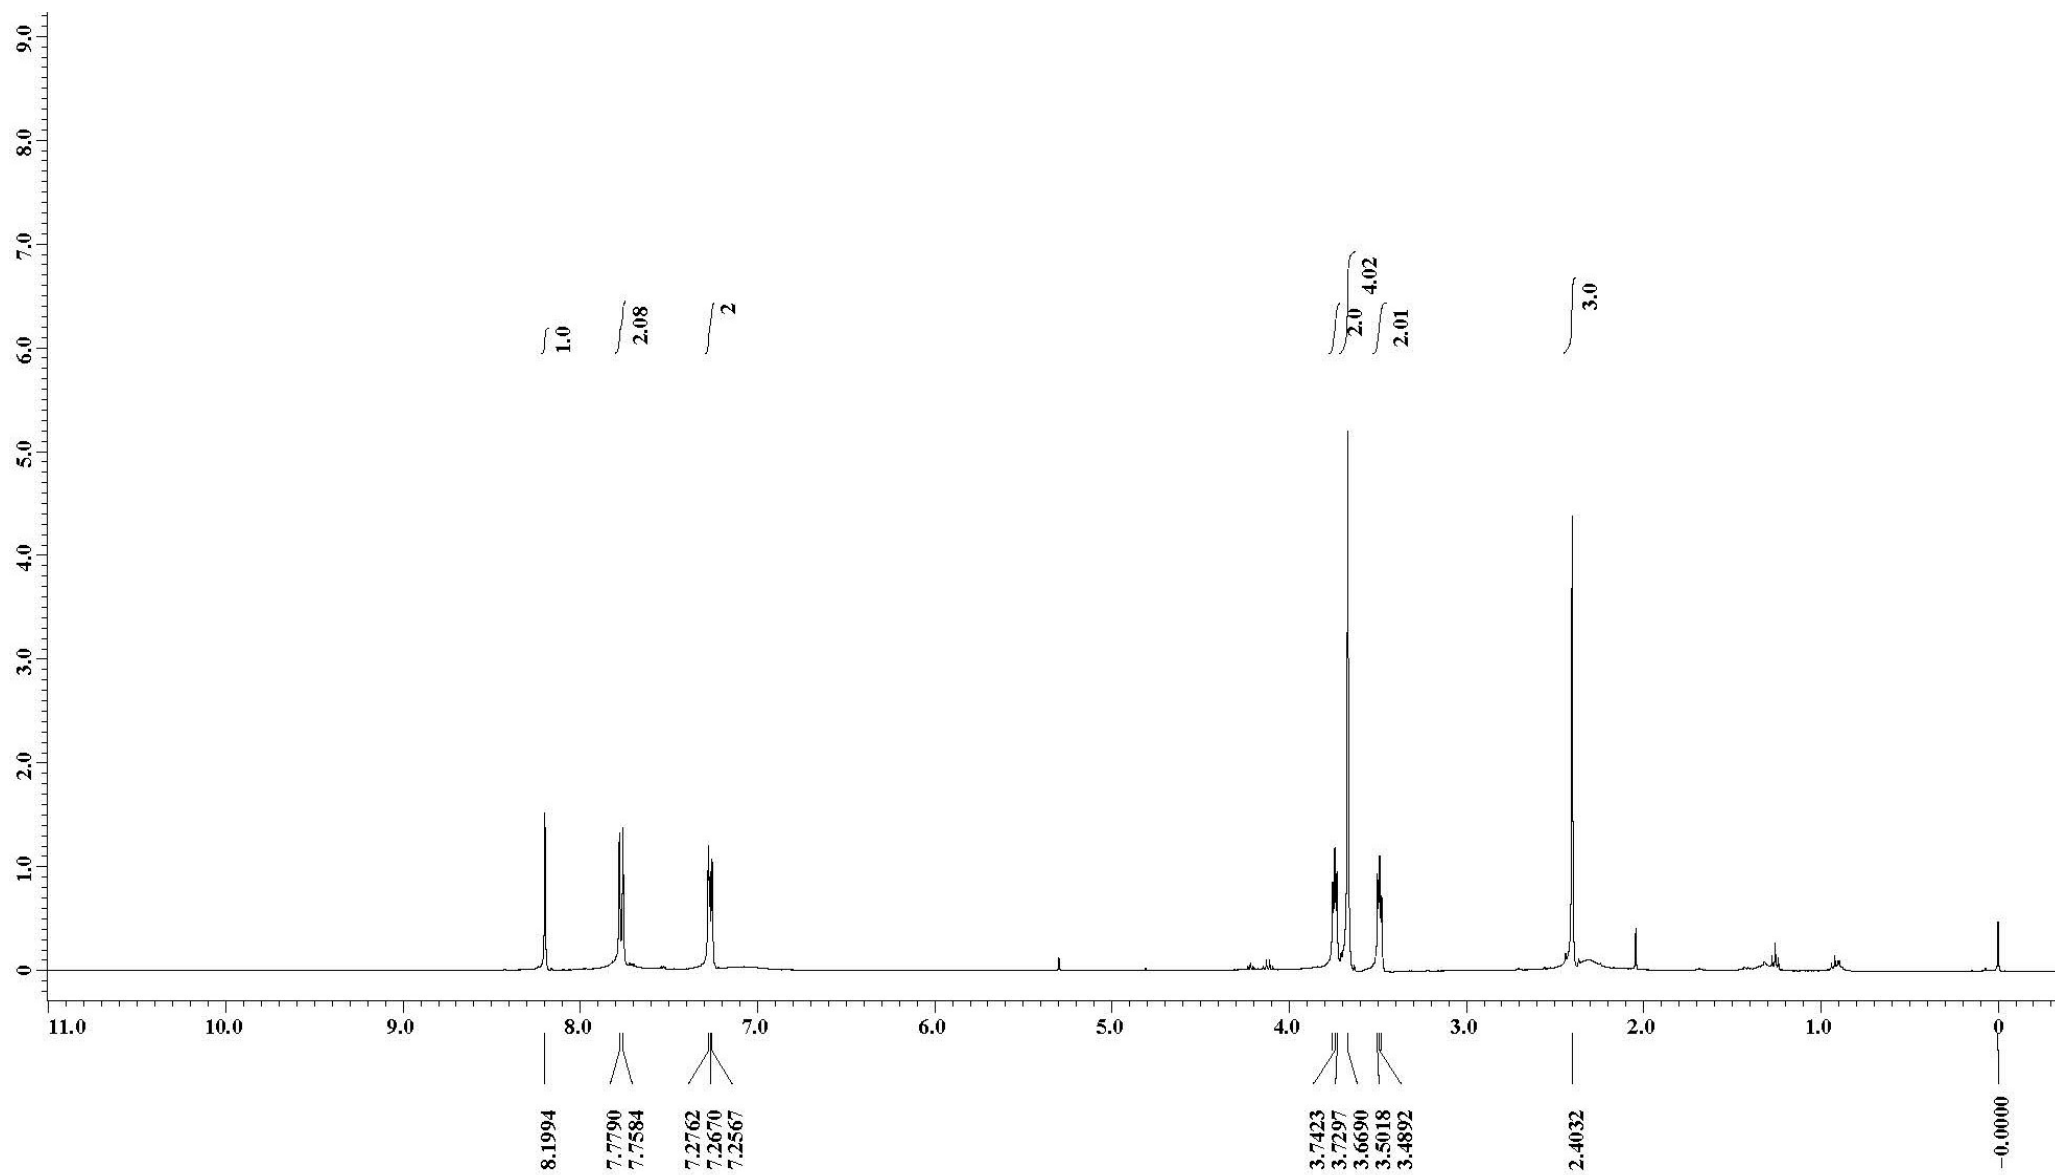

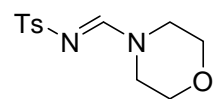

**12d**,  $^{13}\text{C}$  NMR (100 MHz,  $\text{CDCl}_3$ )

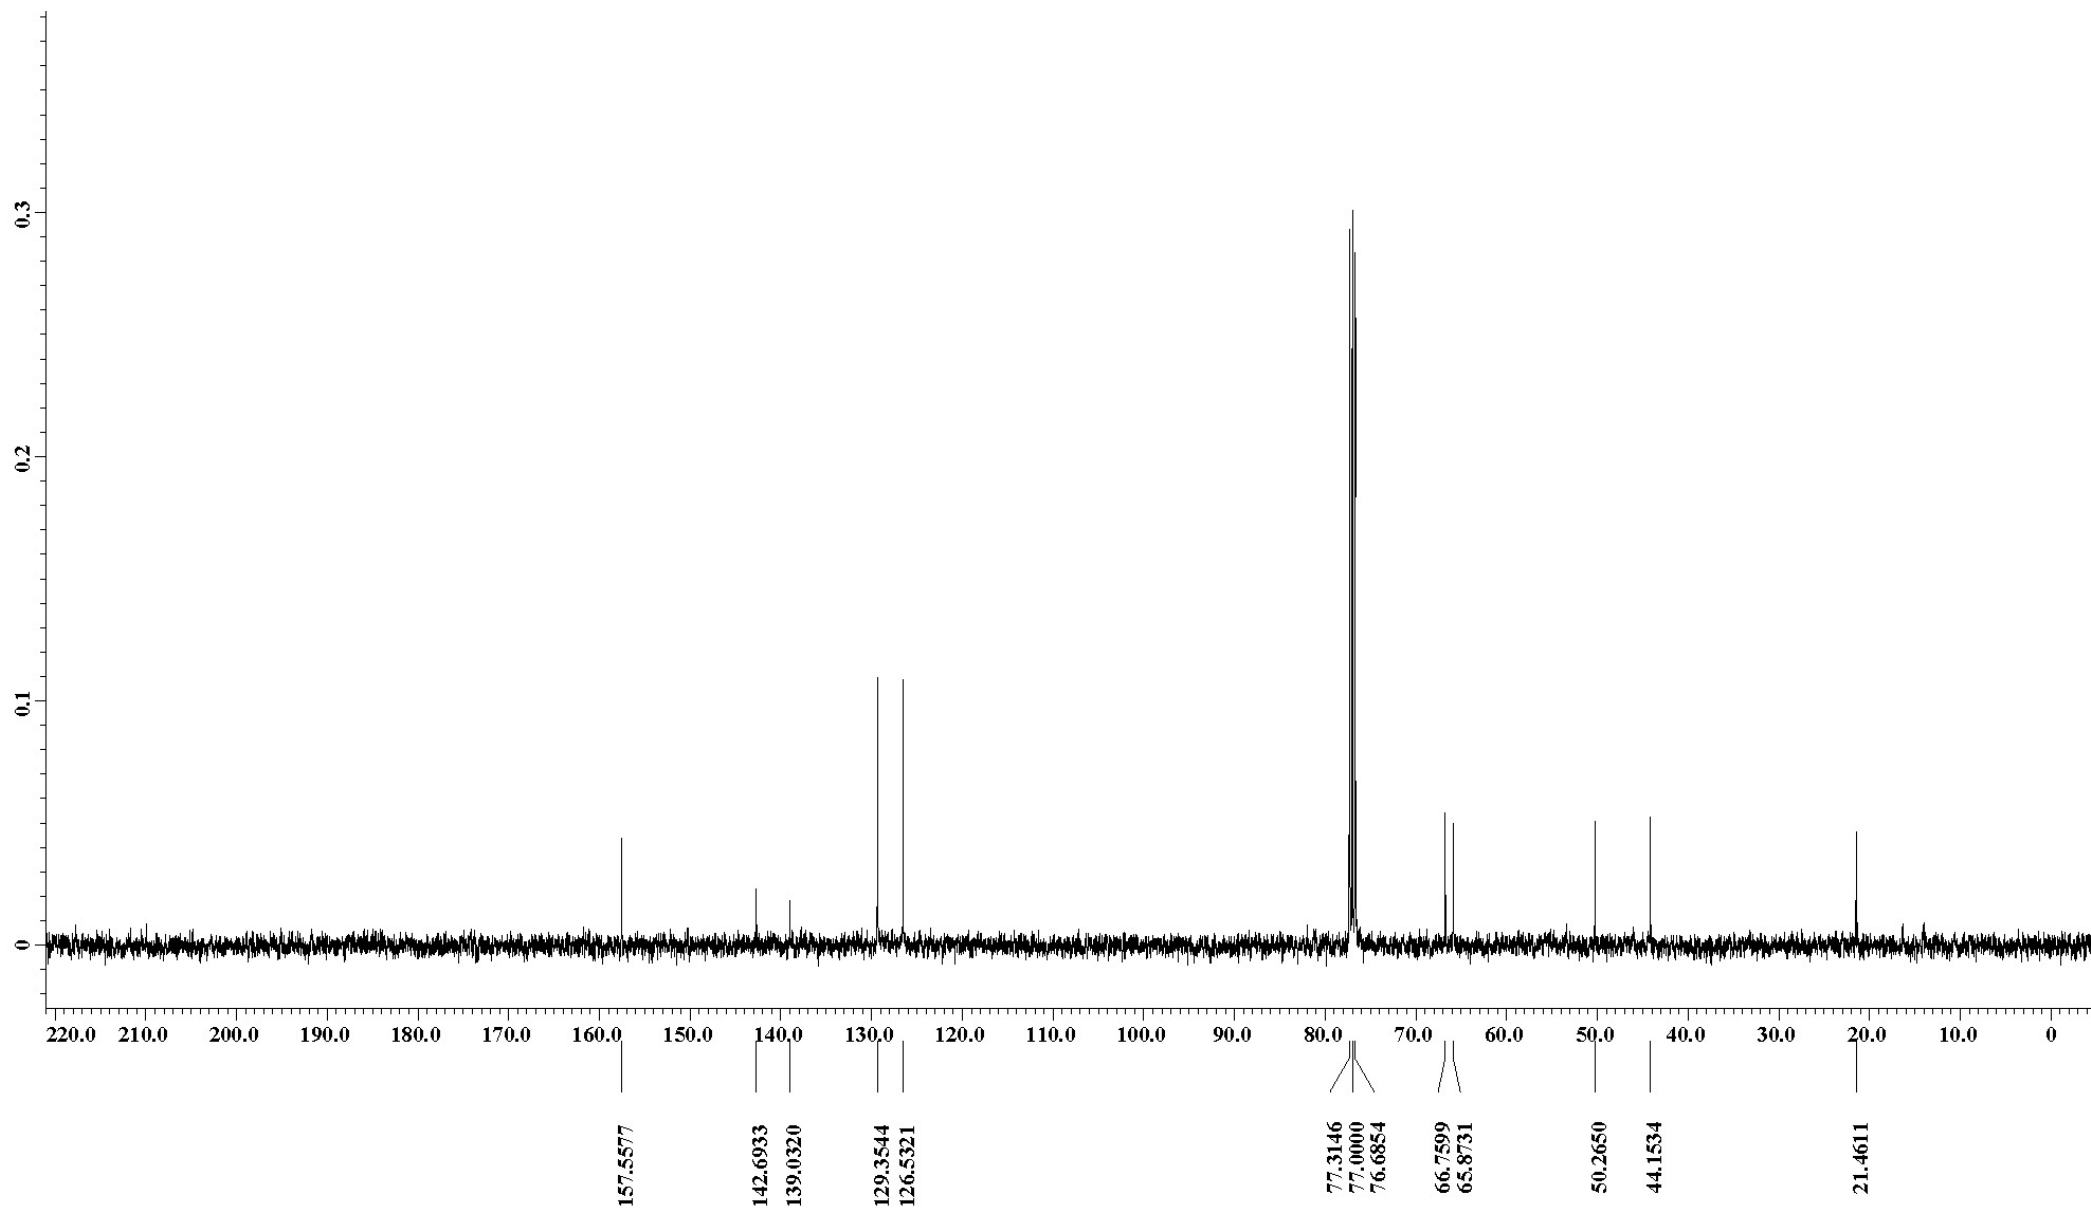

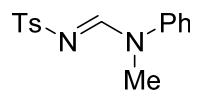

**12e**,  $^1\text{H}$  NMR (400 MHz,  $\text{CDCl}_3$ )

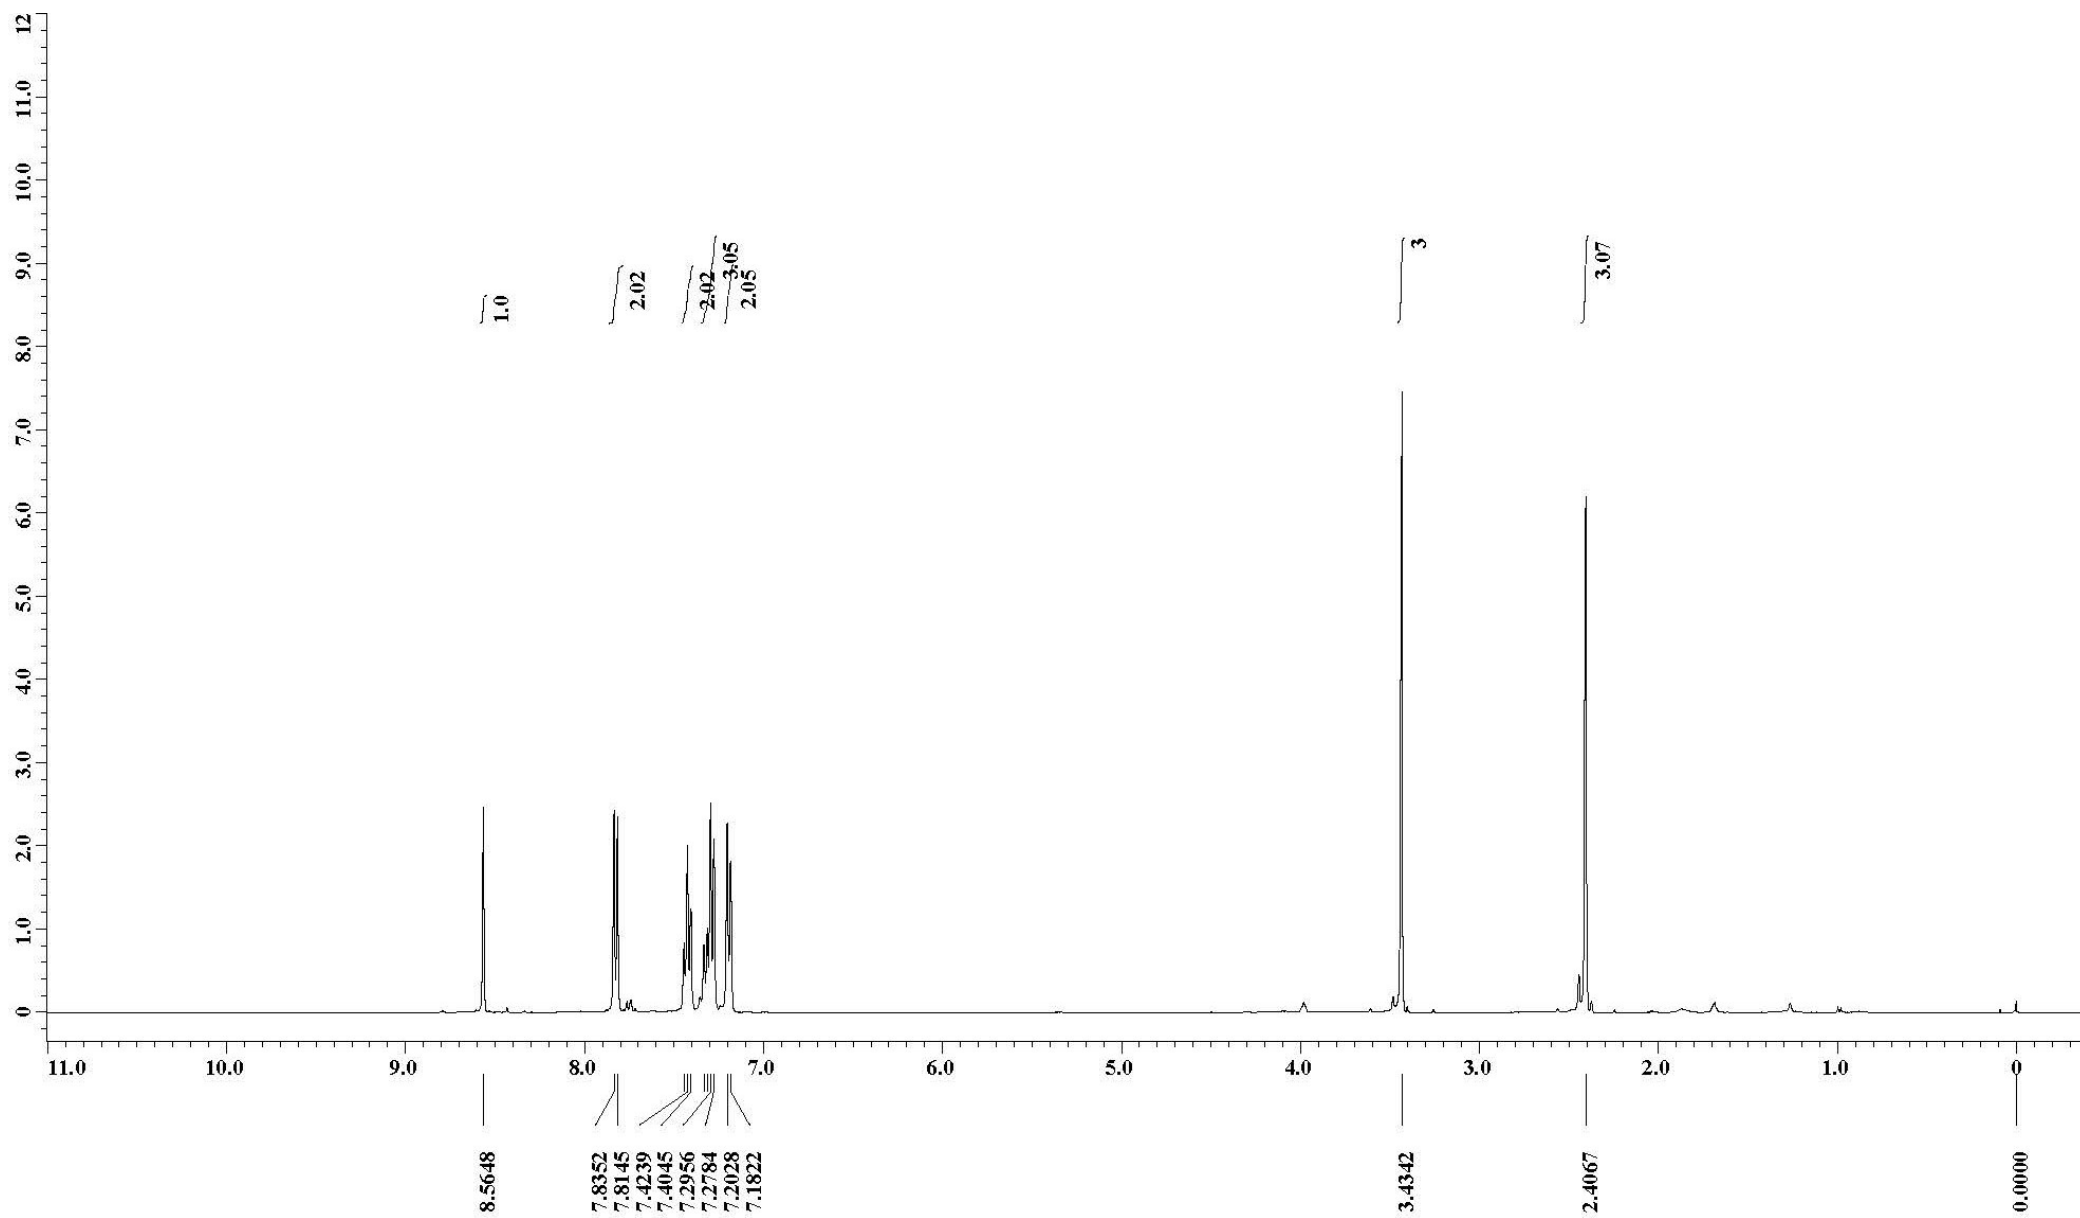

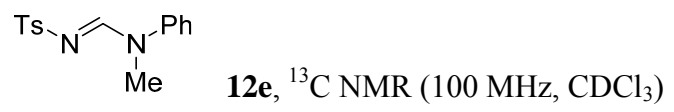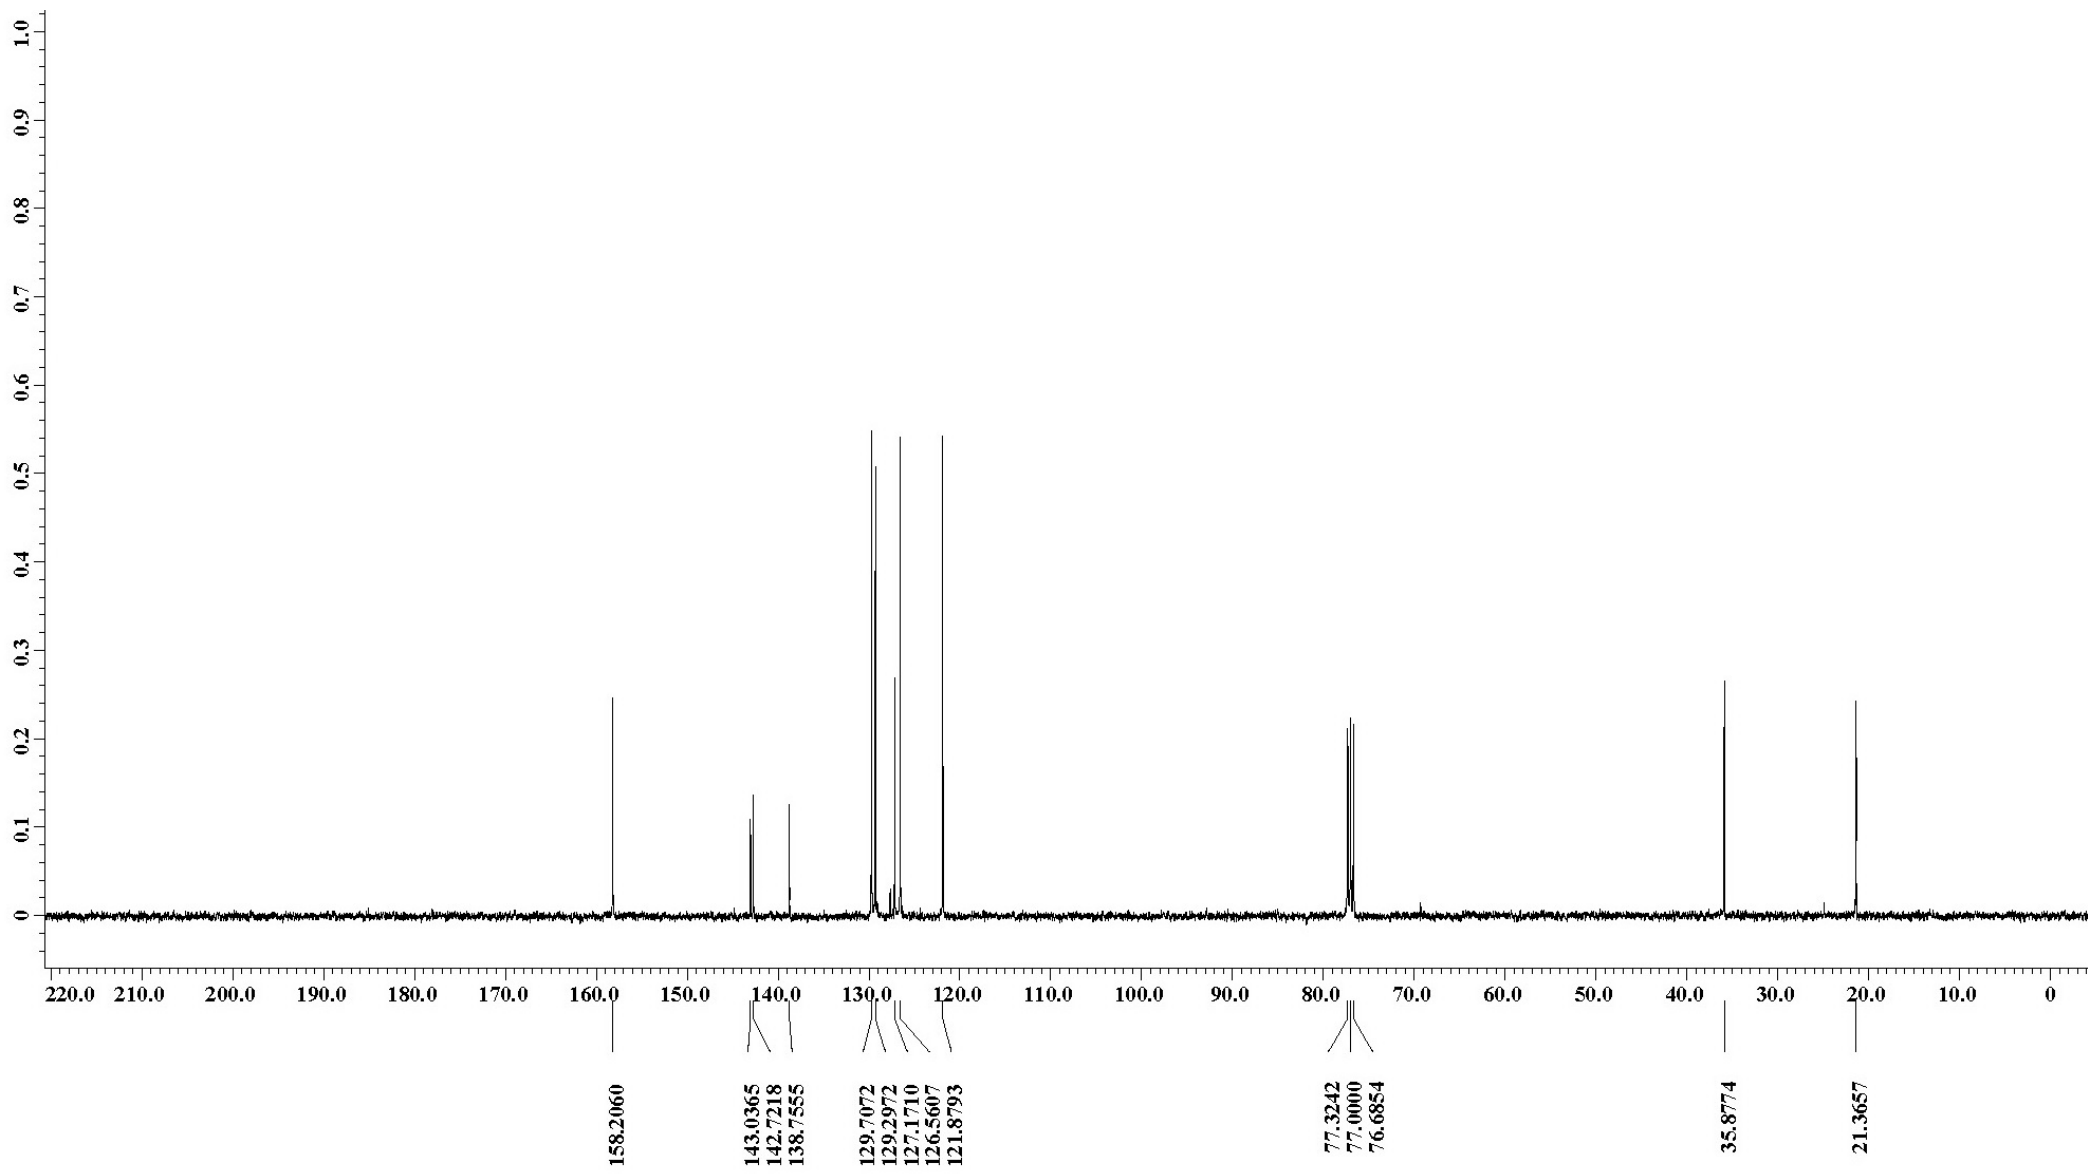

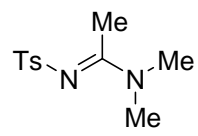

**12f**,  $^1\text{H}$  NMR (400 MHz,  $\text{CDCl}_3$ )

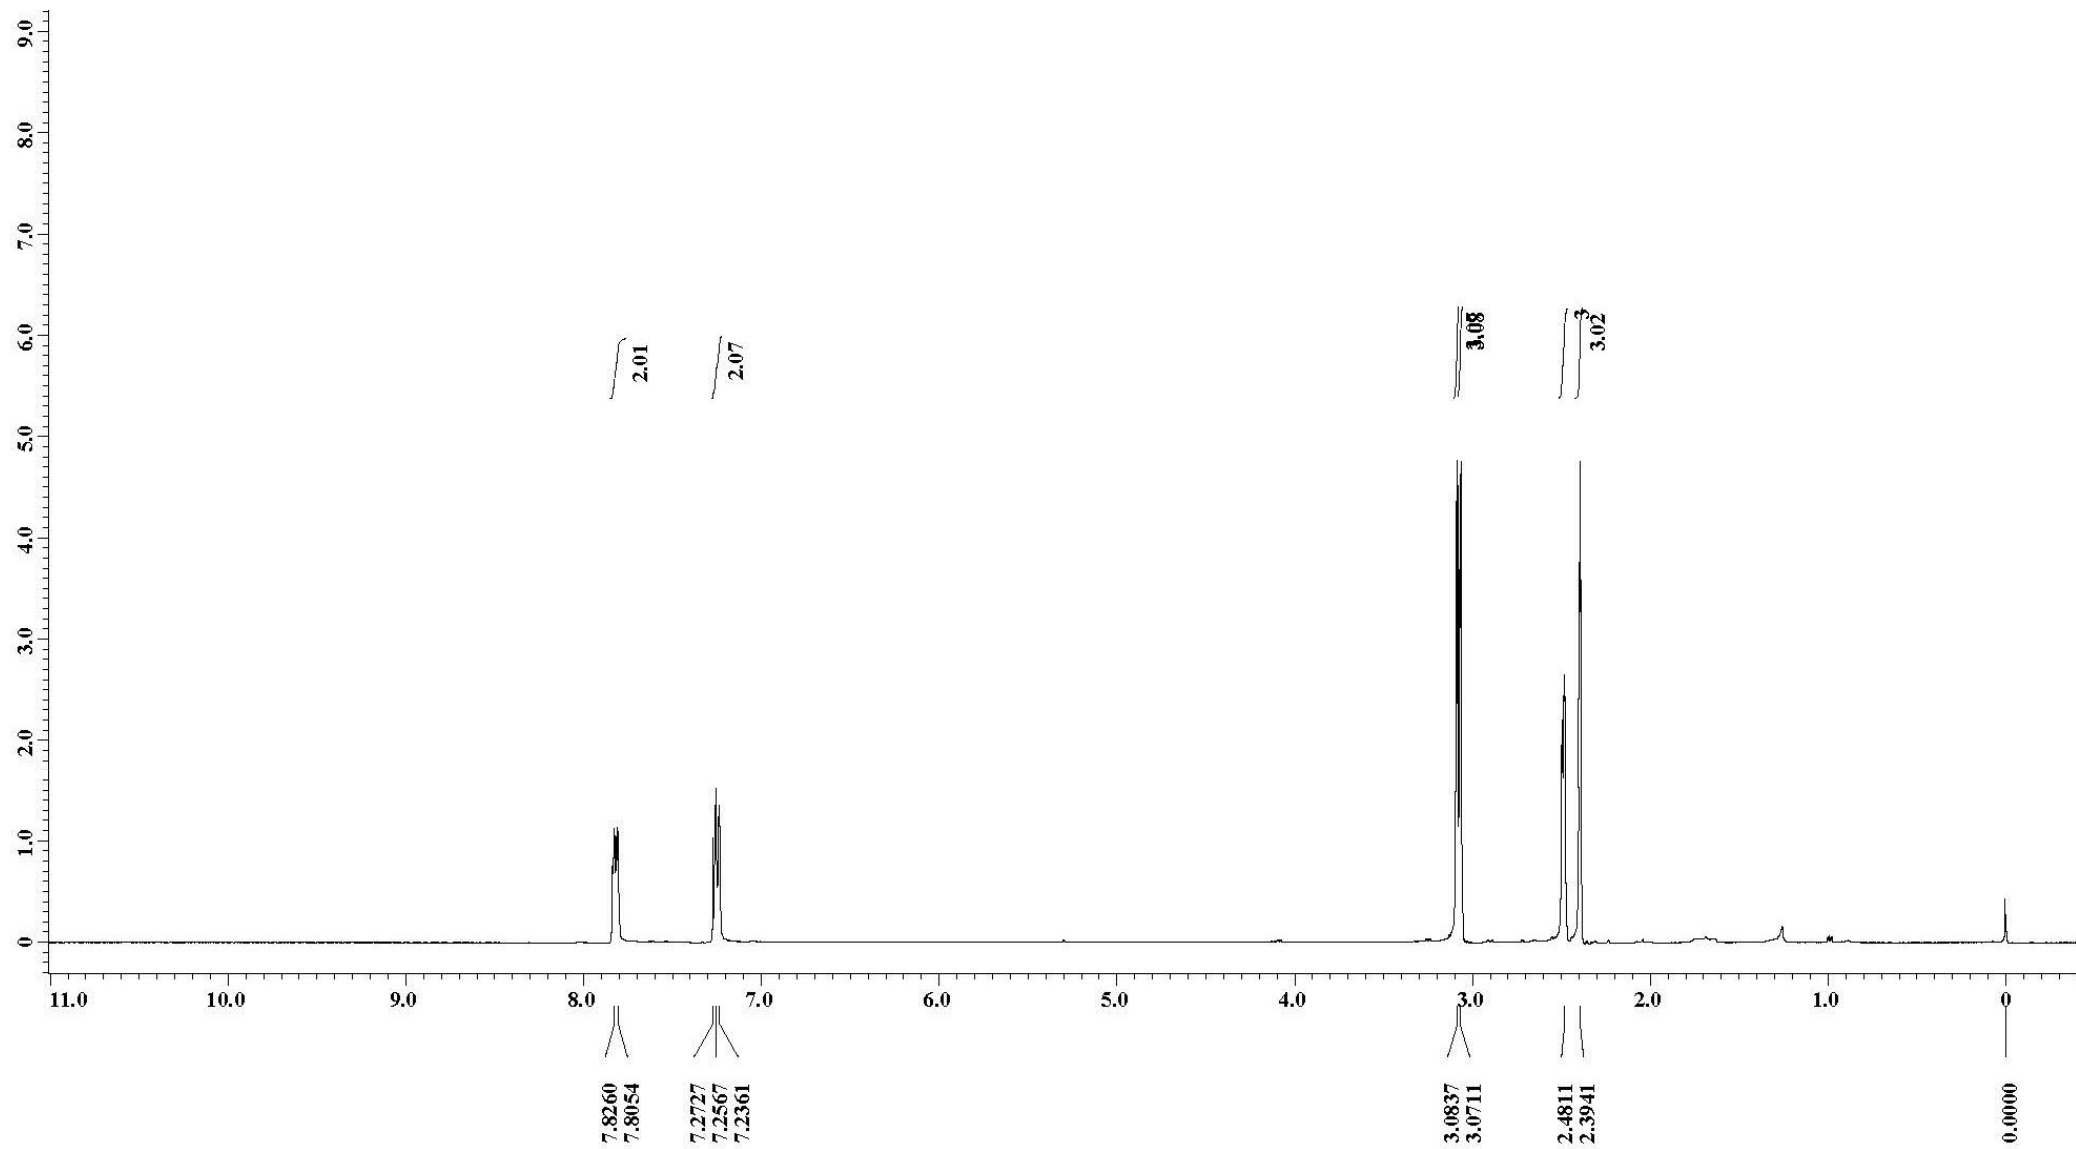

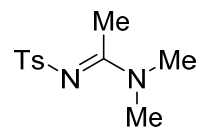

**12f**,  $^{13}\text{C}$  NMR (100 MHz,  $\text{CDCl}_3$ )

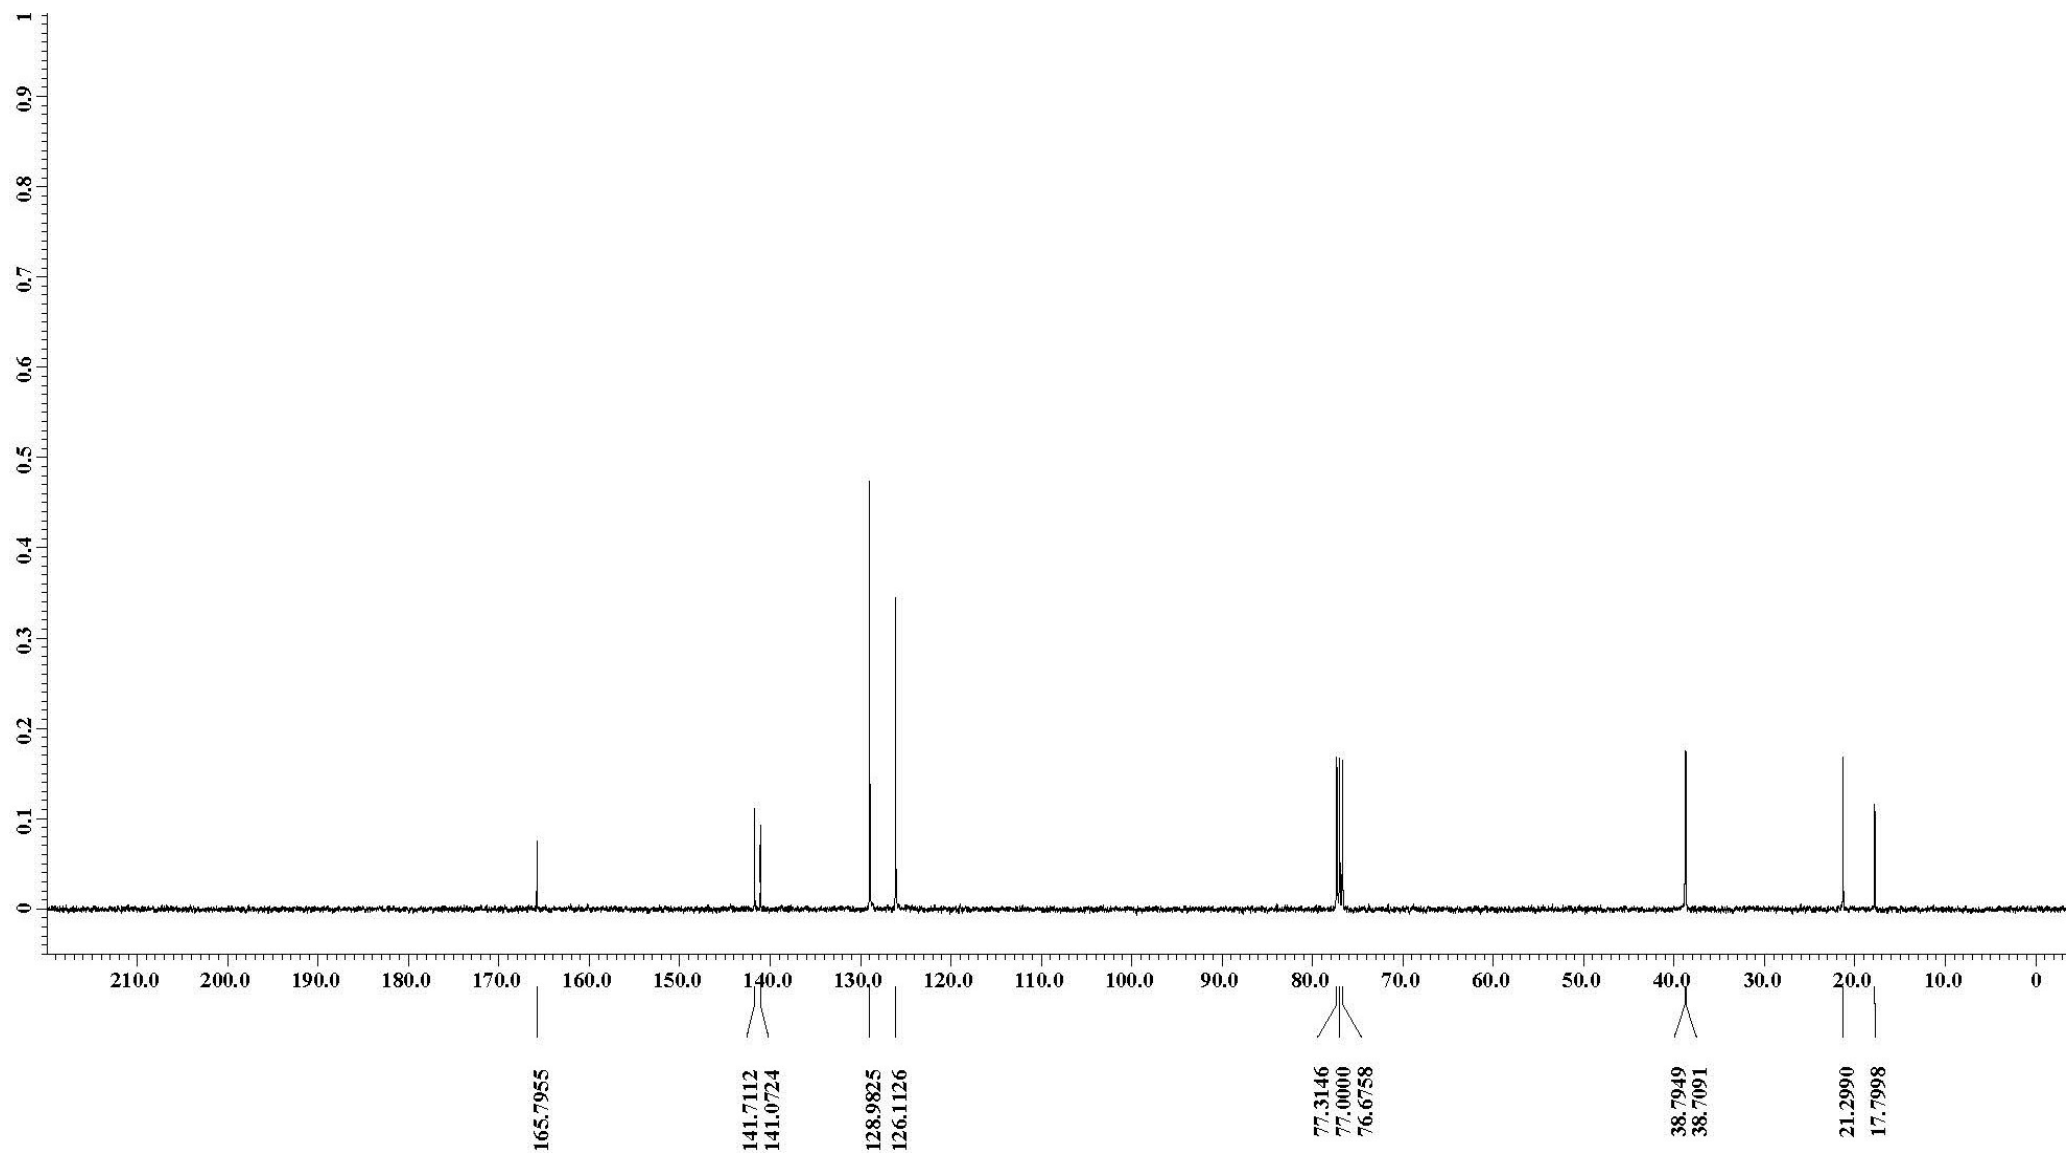

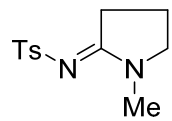

**12g**,  $^1\text{H}$  NMR (400 MHz,  $\text{CDCl}_3$ )

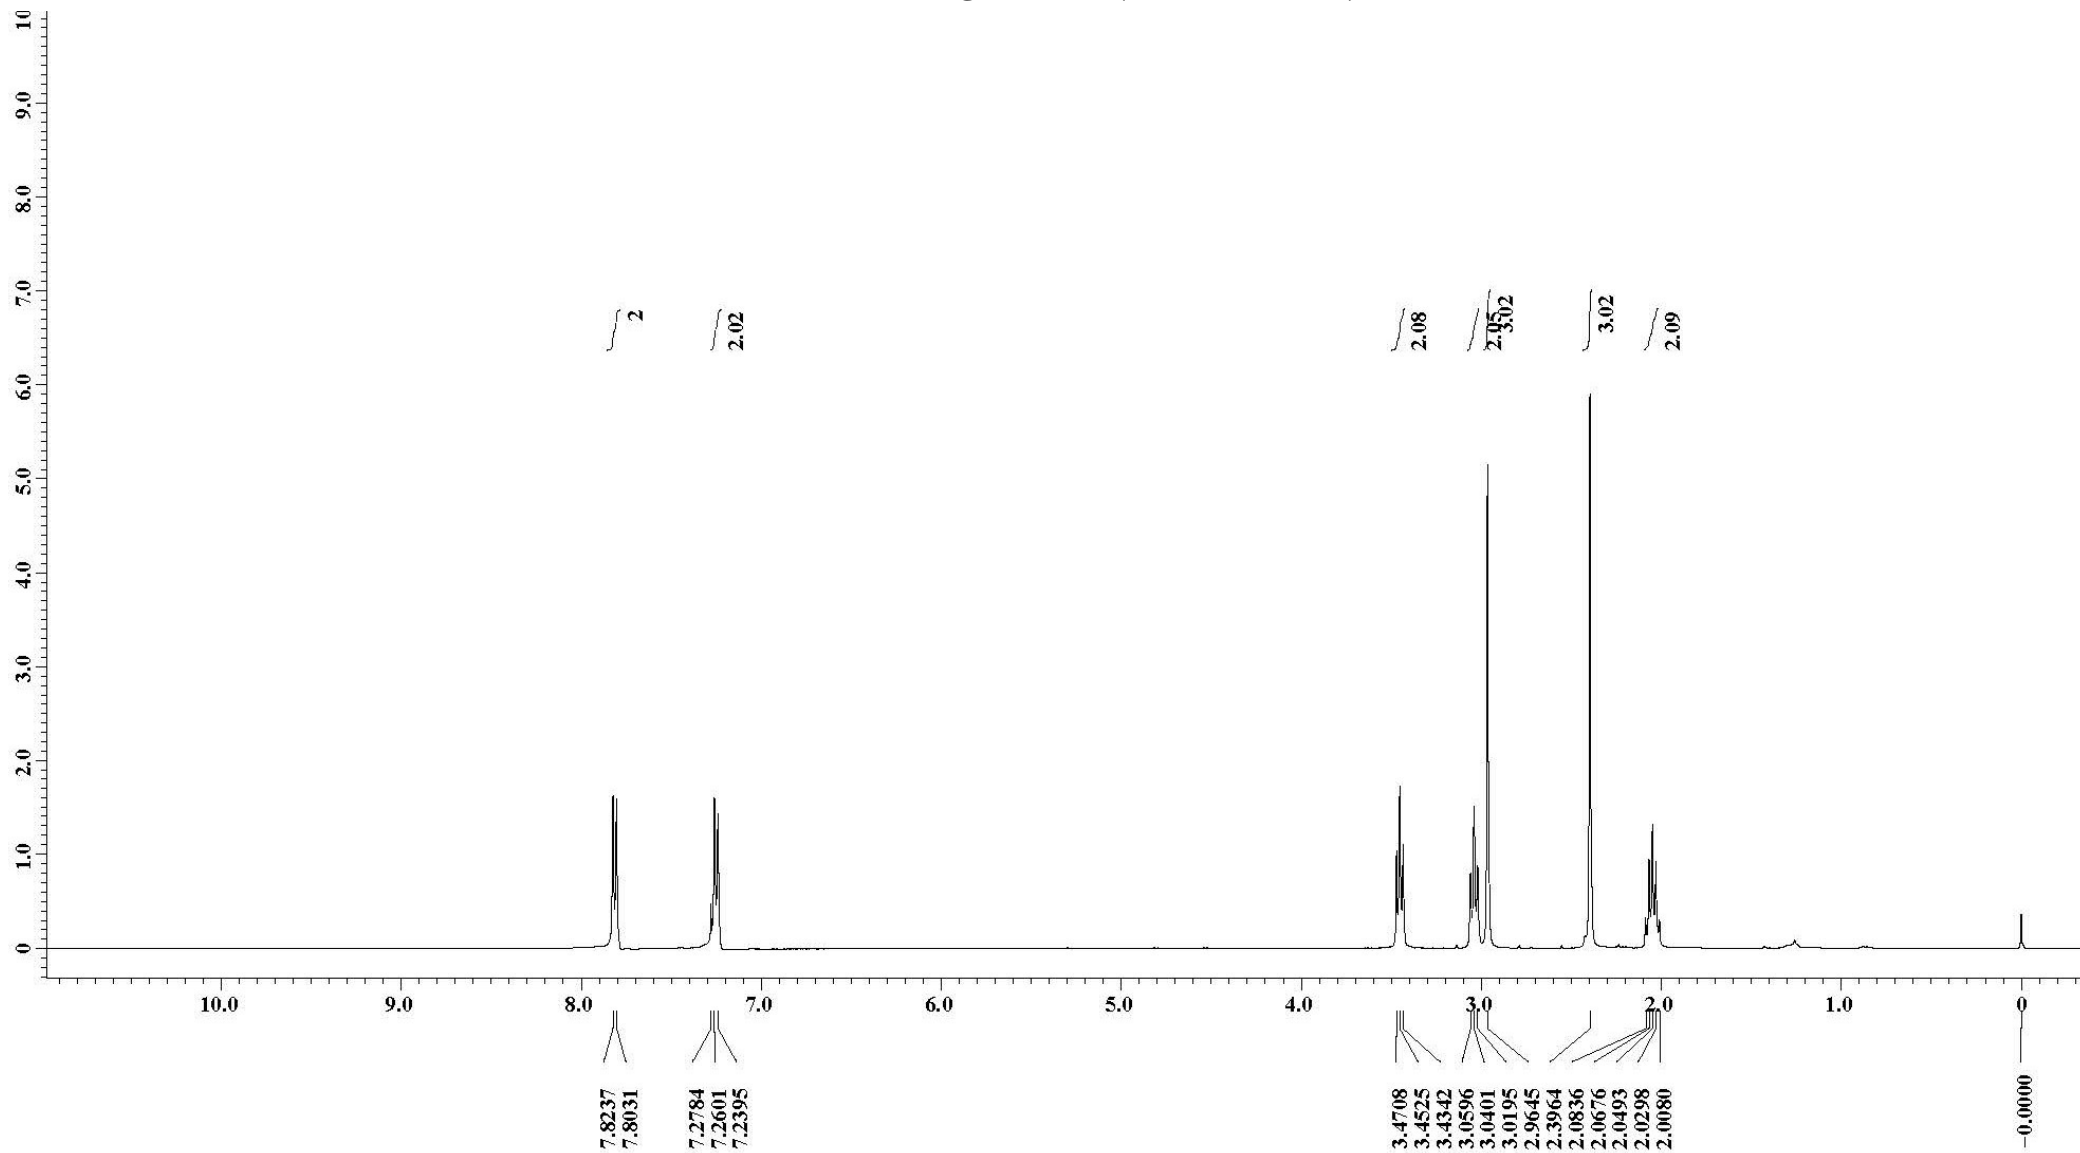



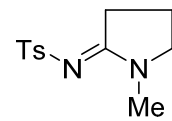

**12g**,  $^{13}\text{C}$  NMR (100 MHz,  $\text{CDCl}_3$ )

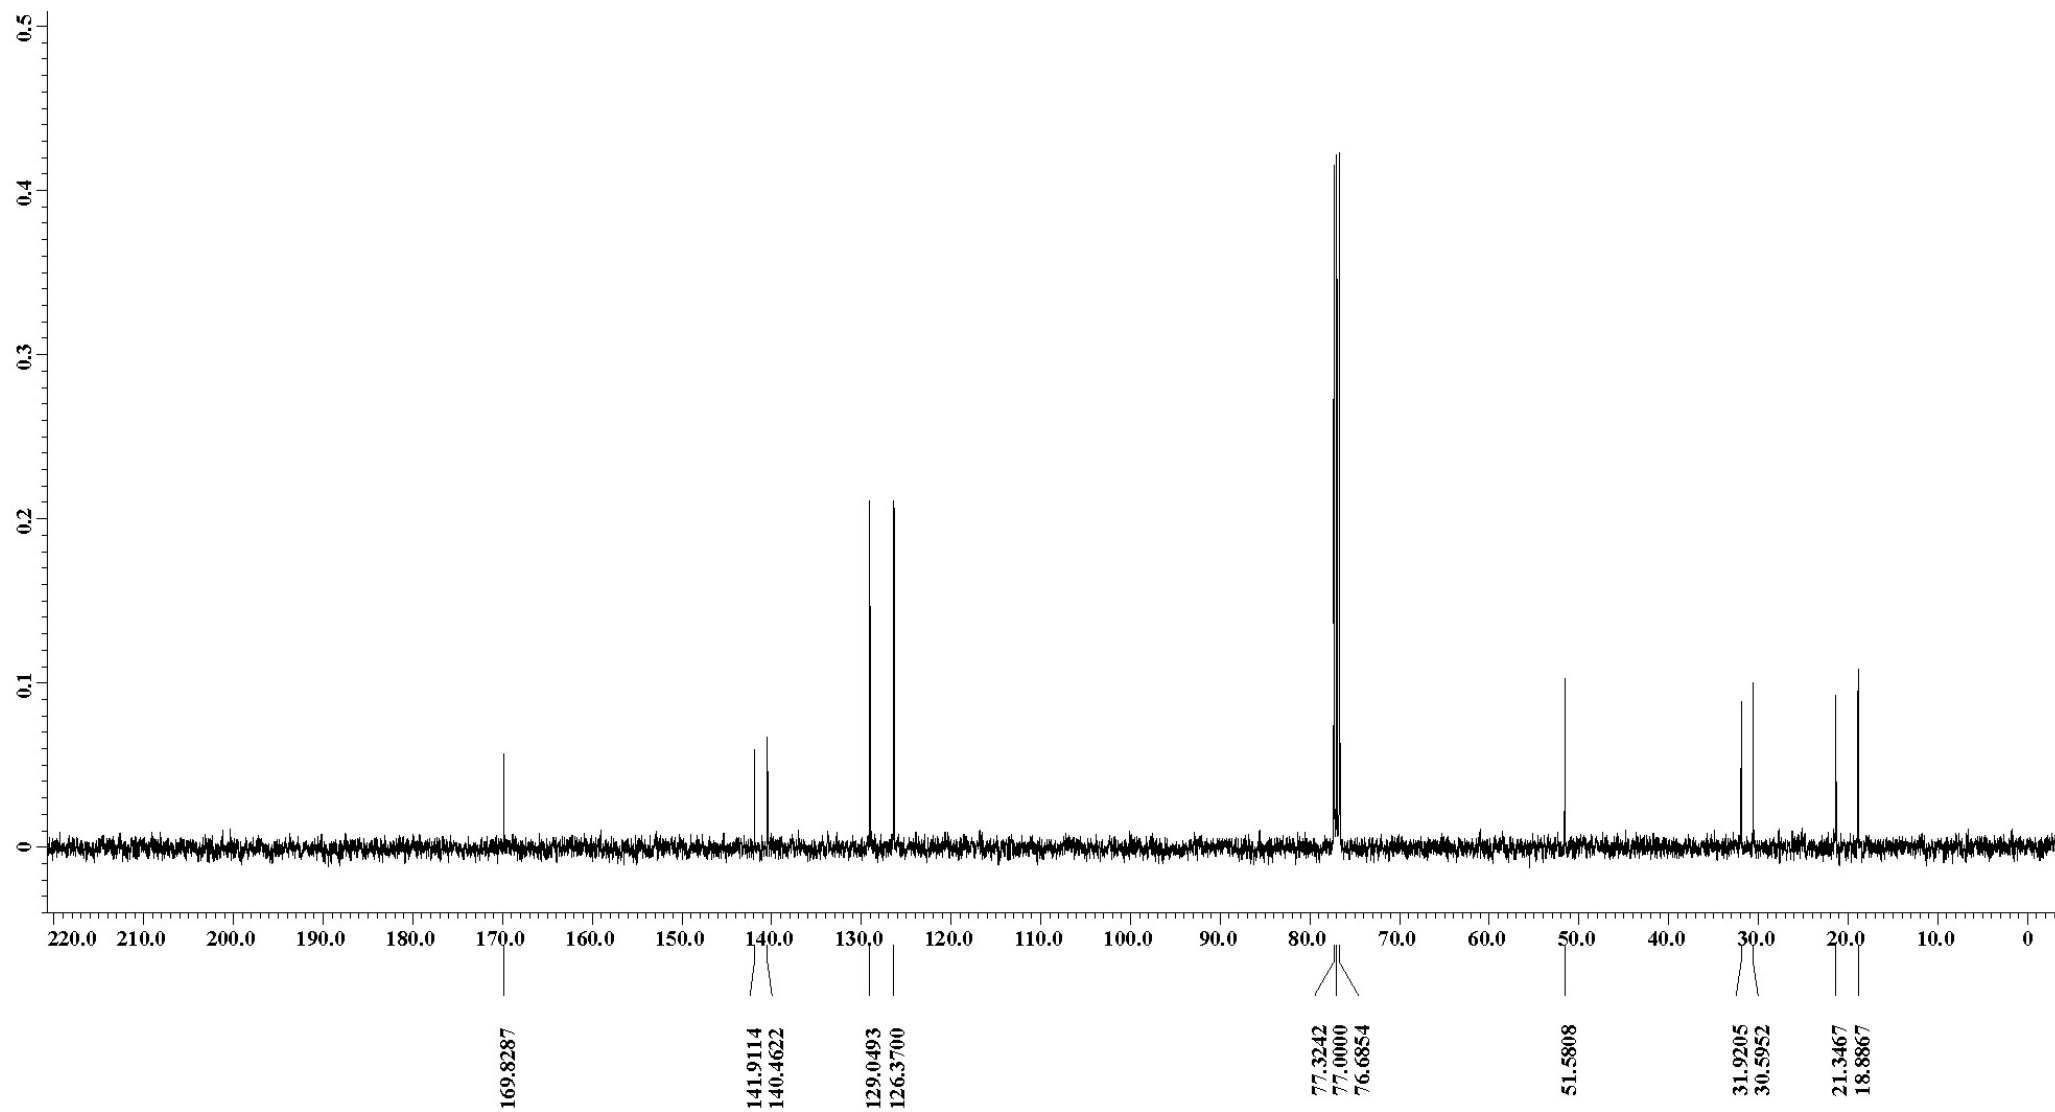

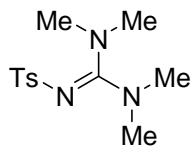

**12h**,  $^1\text{H}$  NMR (400 MHz,  $\text{CDCl}_3$ )

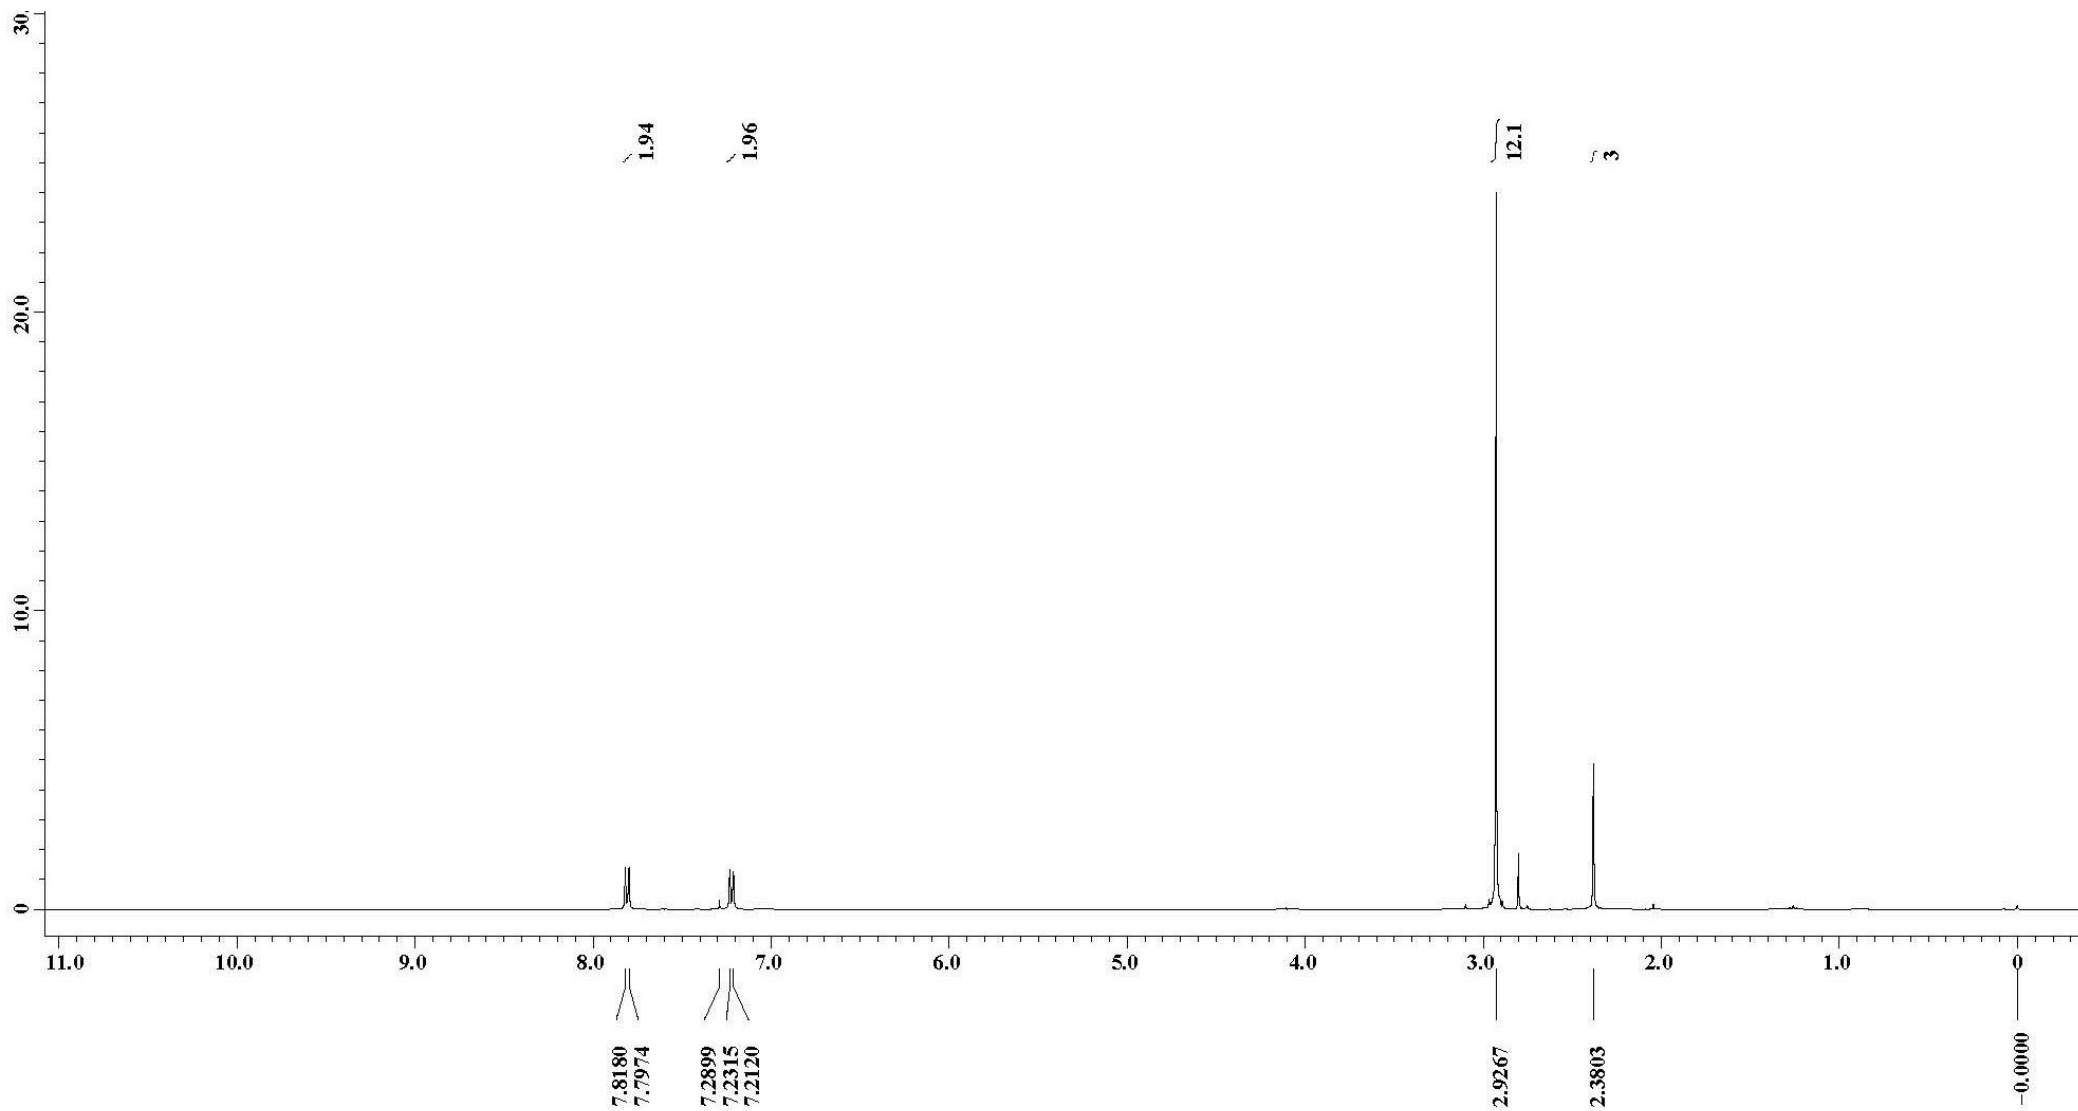

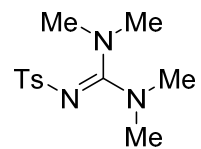

**12h**,  $^{13}\text{C}$  NMR (100 MHz,  $\text{CDCl}_3$ )

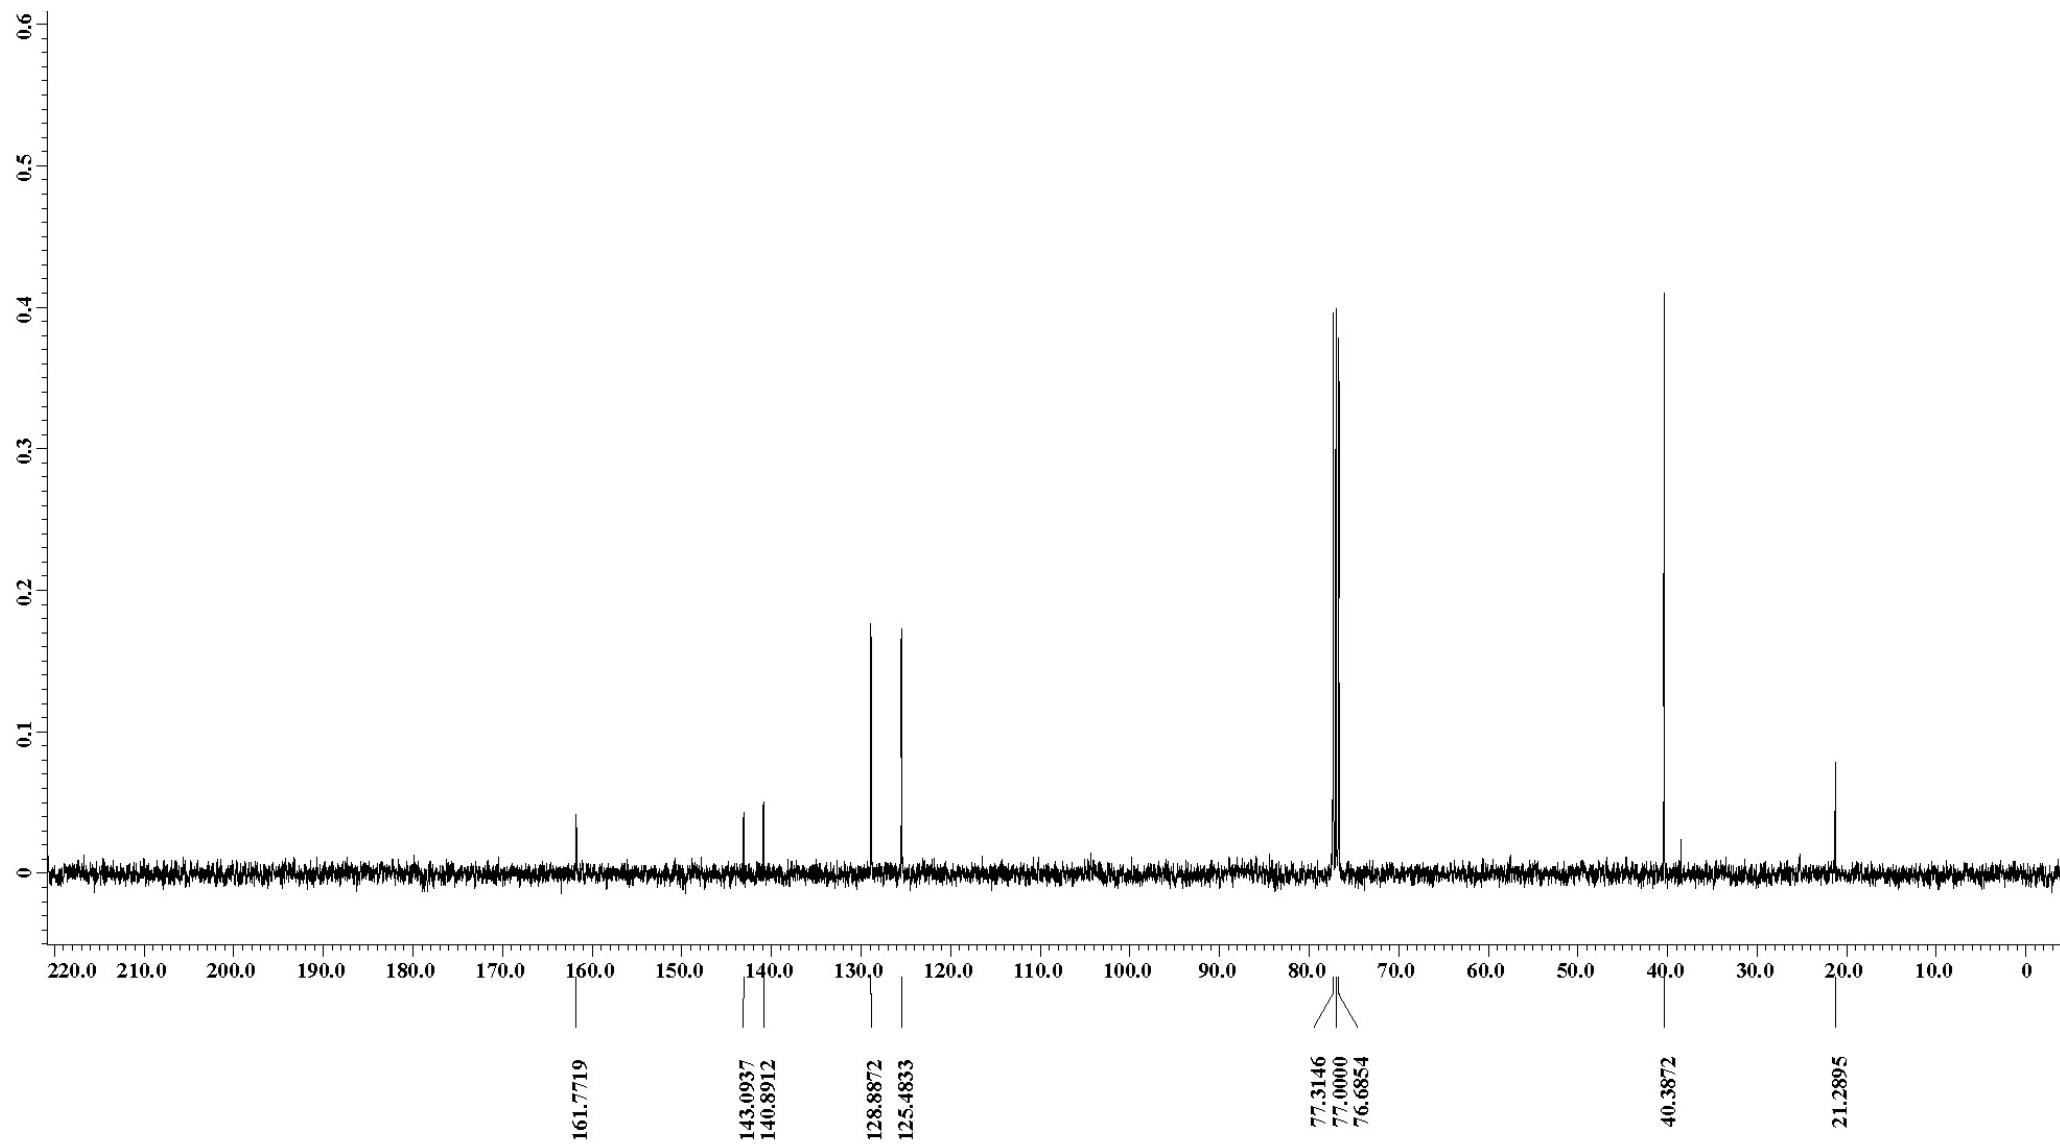

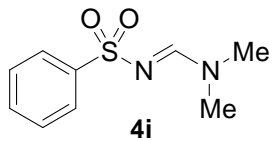

12i, <sup>1</sup>H NMR (400 MHz, CDCl<sub>3</sub>)

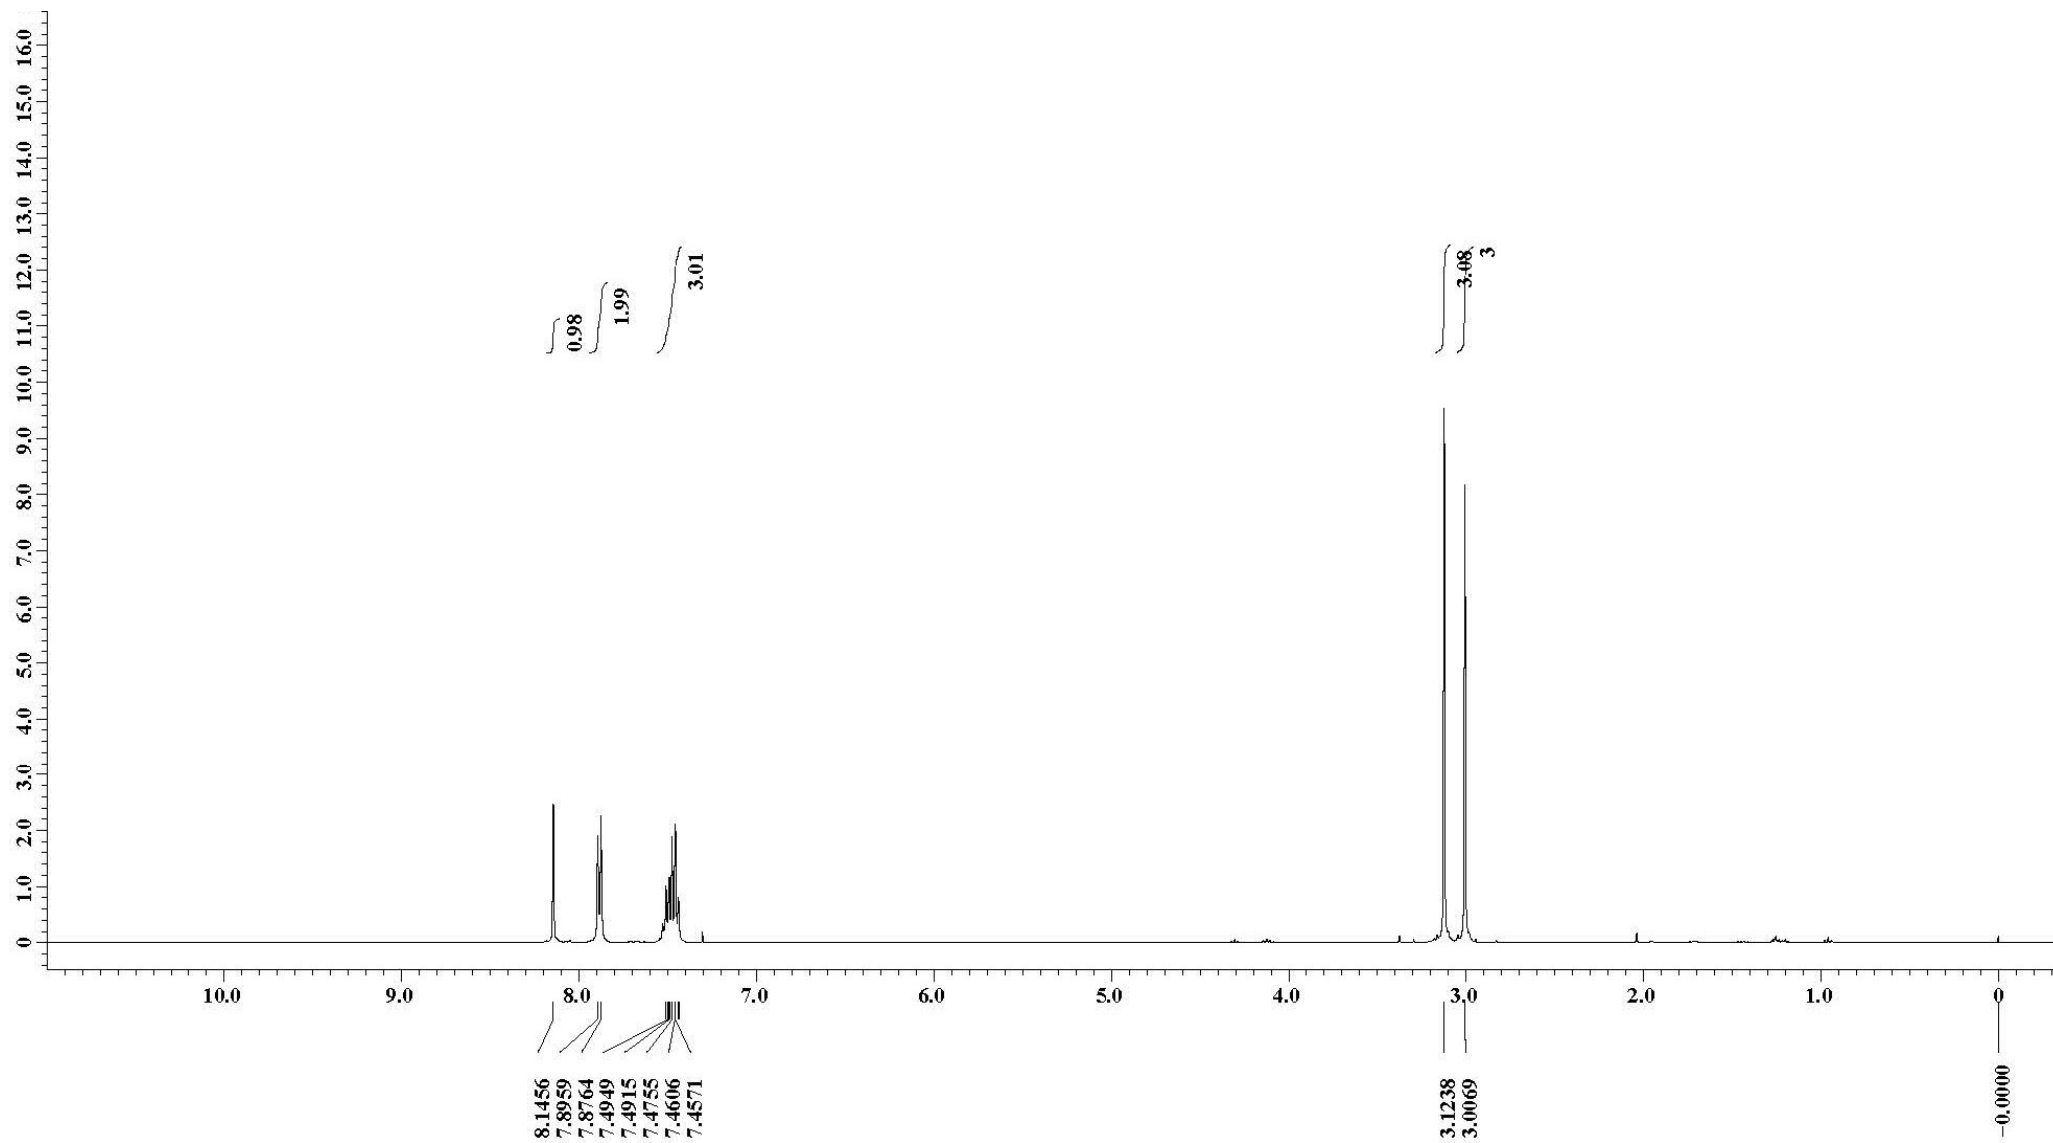

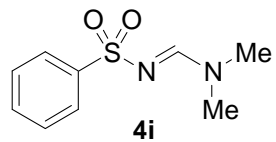

**12i**,  $^{13}\text{C}$  NMR (100 MHz,  $\text{CDCl}_3$ )

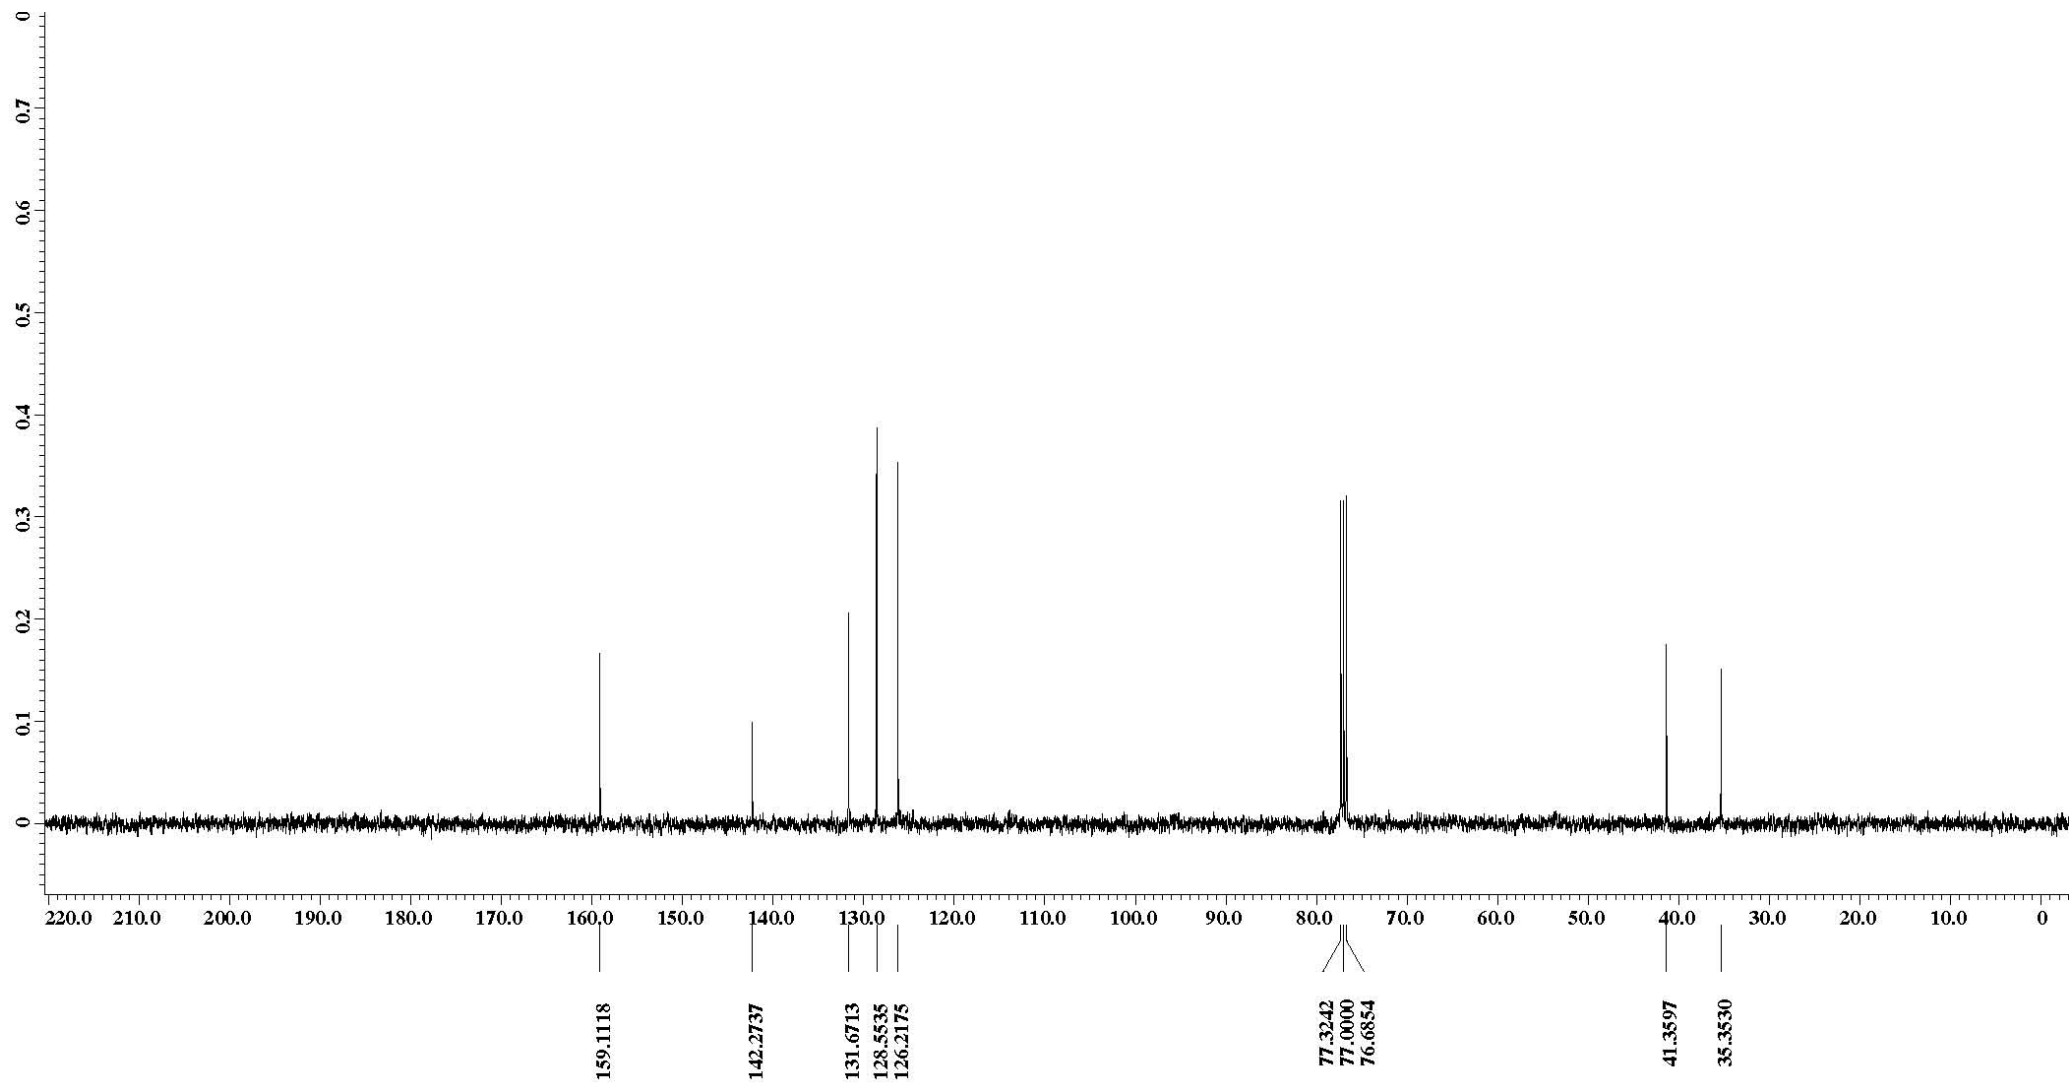

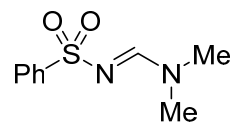

**12j**, <sup>1</sup>H NMR (400 MHz, CDCl<sub>3</sub>)

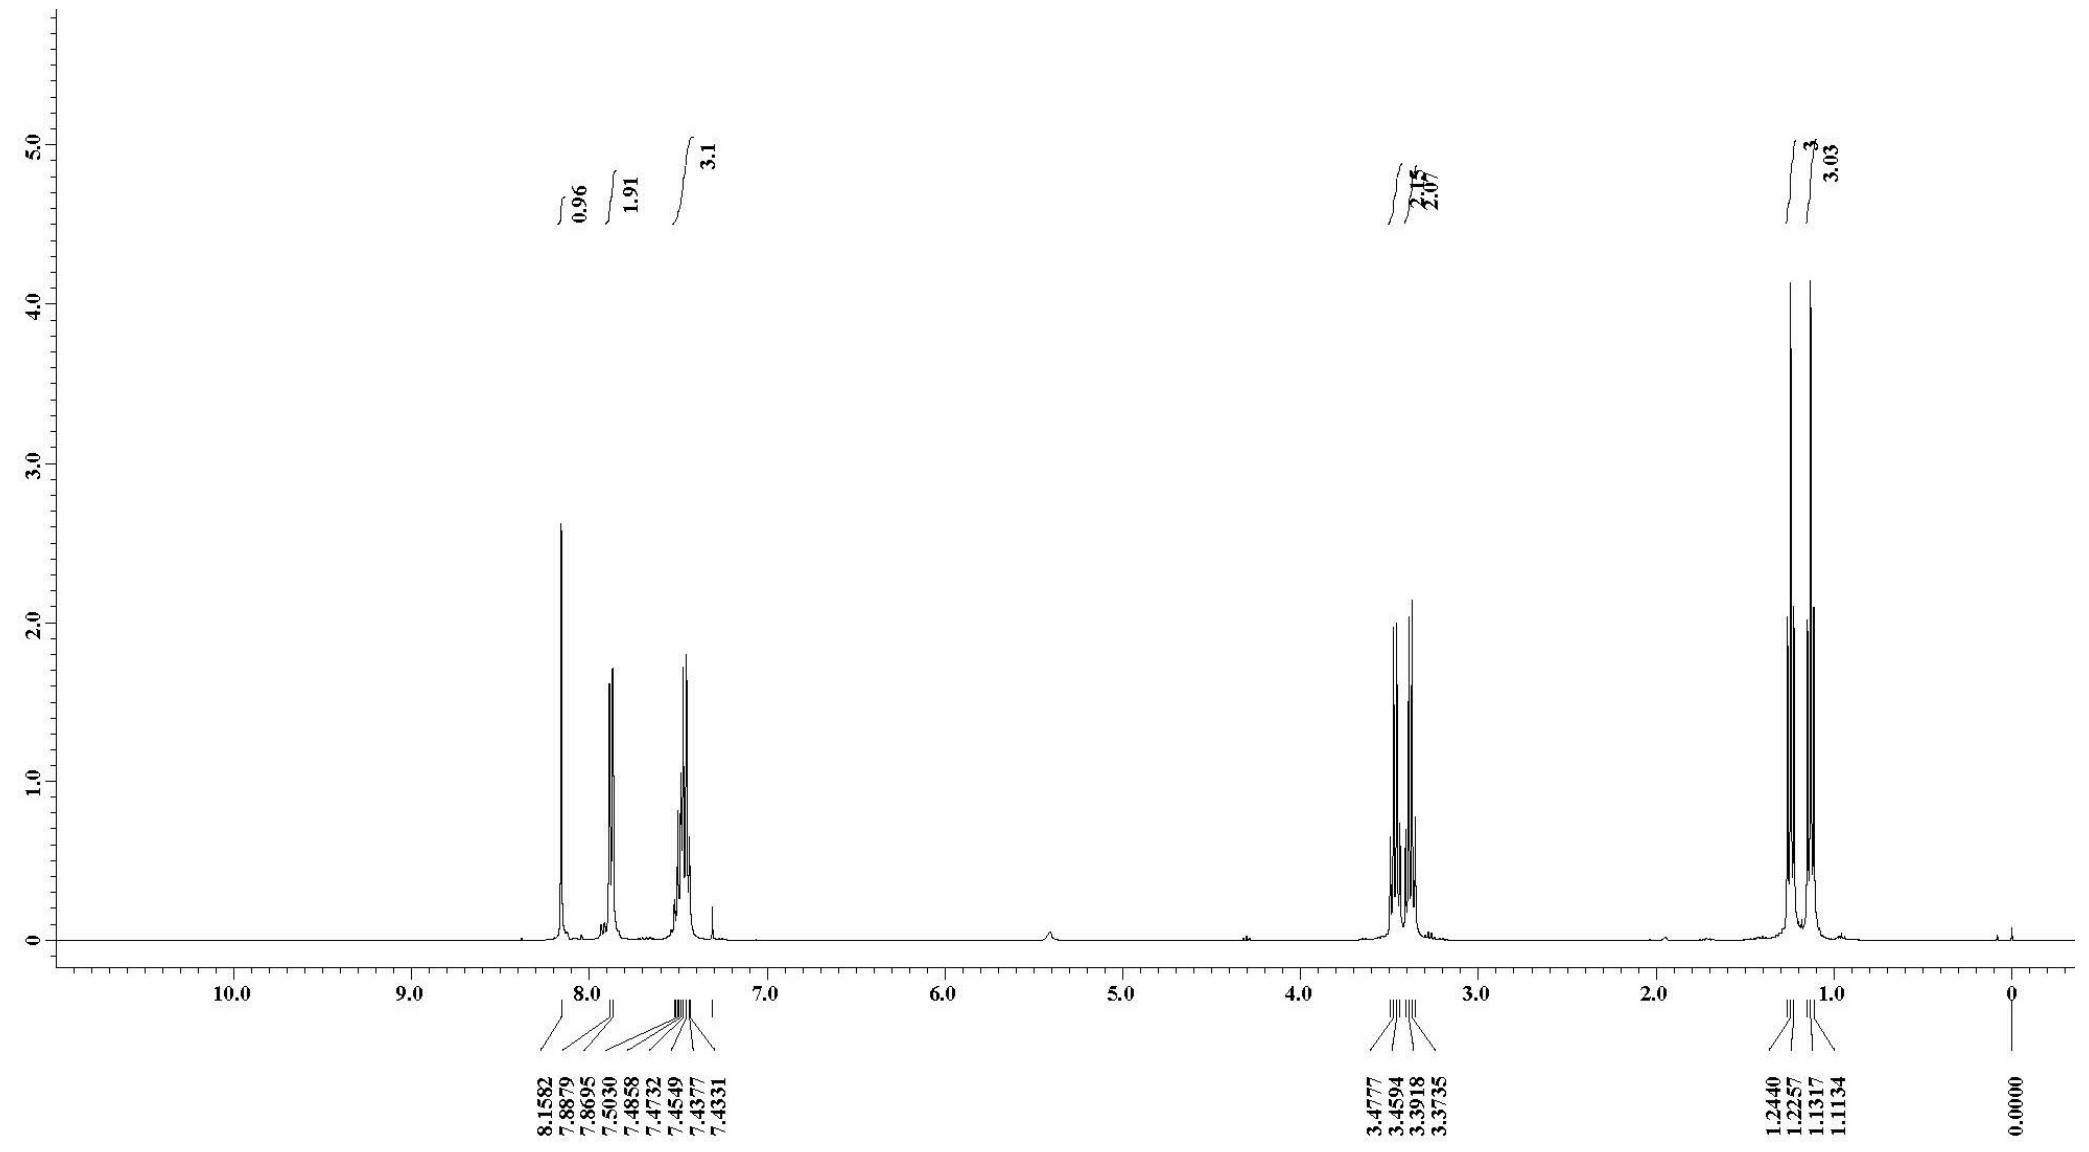

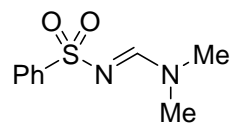

**12j**,  $^{13}\text{C}$  NMR (100 MHz,  $\text{CDCl}_3$ )

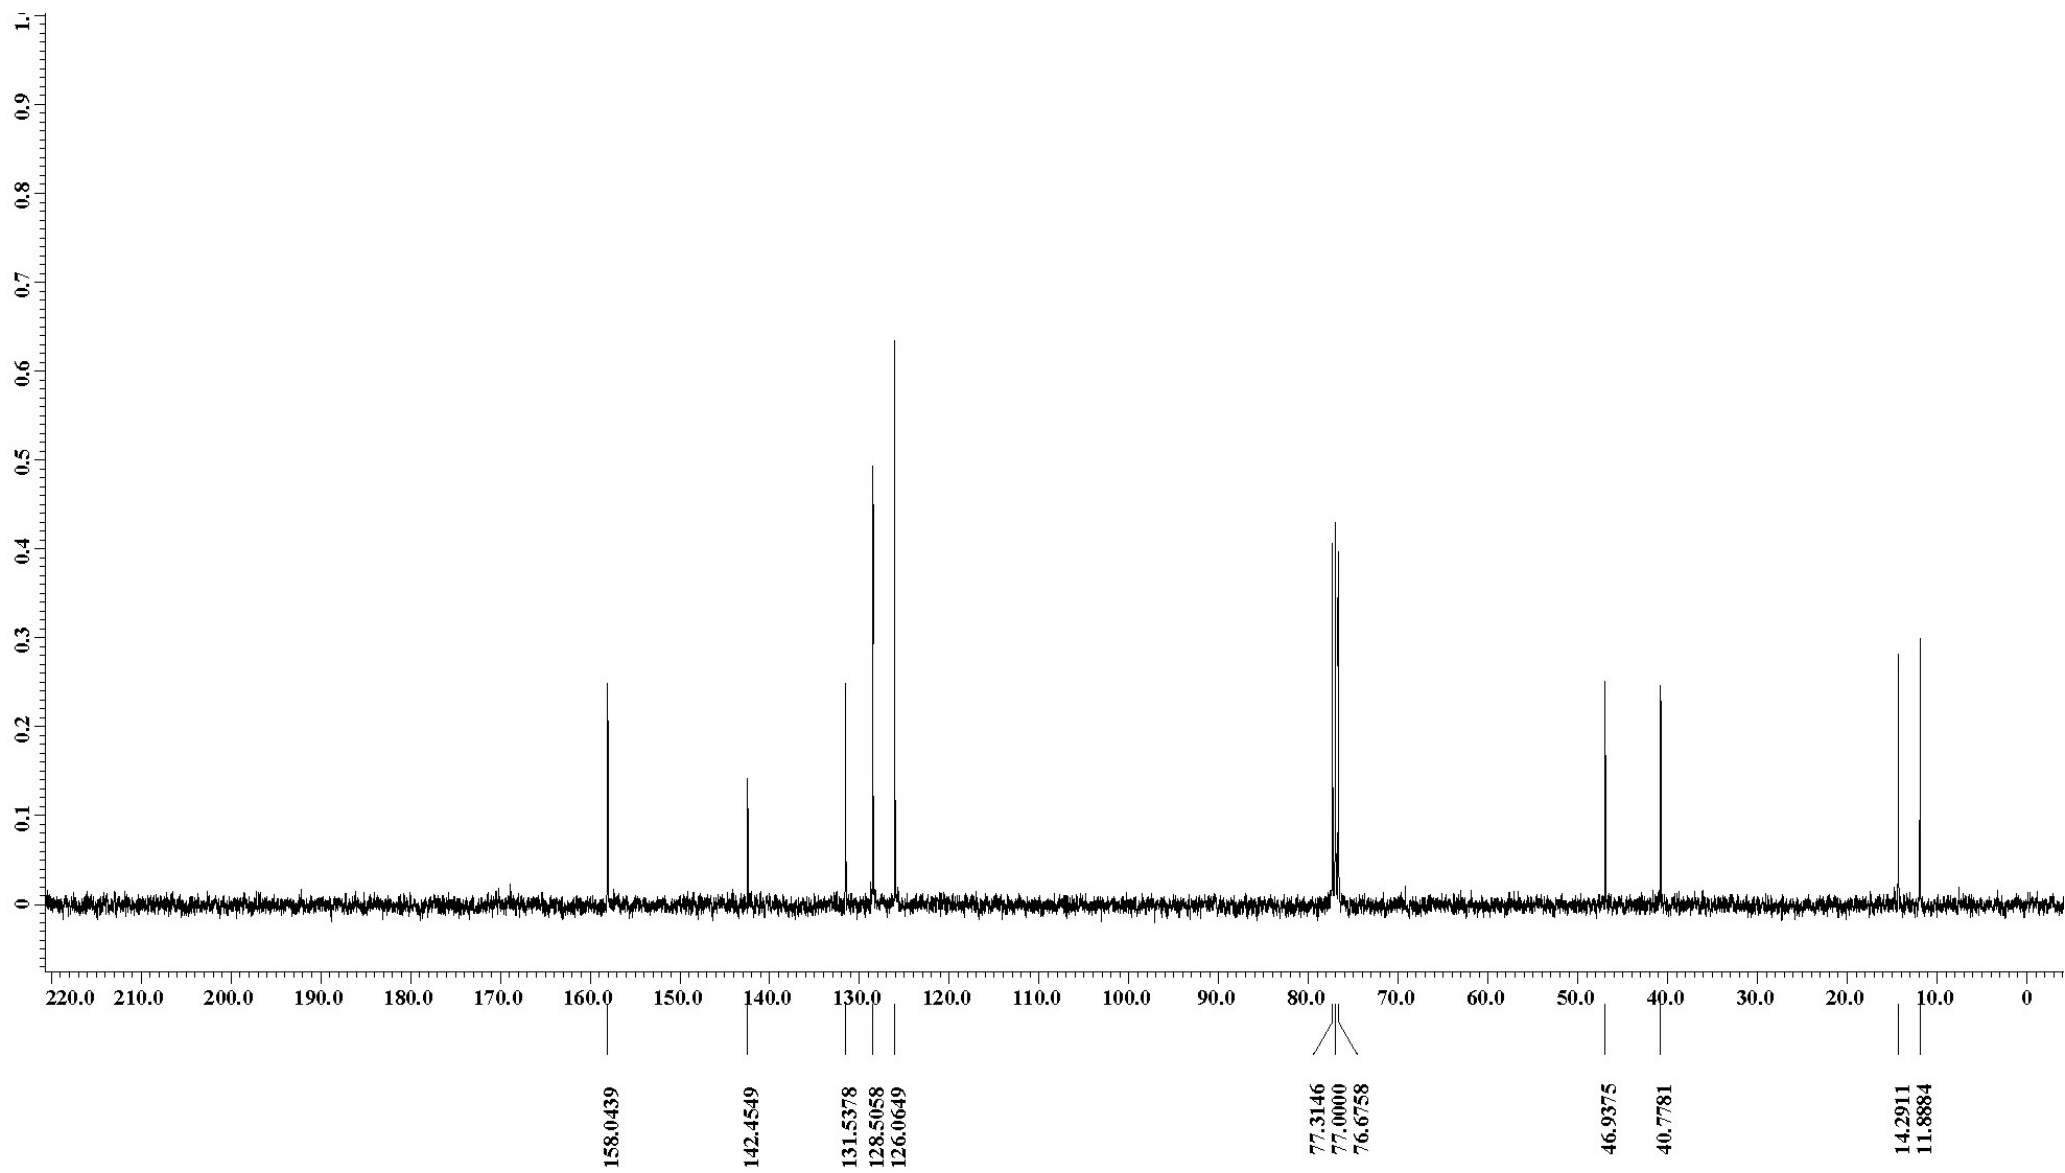

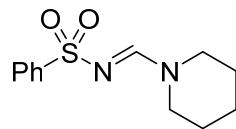

**12k**,  $^1\text{H}$  NMR (400 MHz,  $\text{CDCl}_3$ )

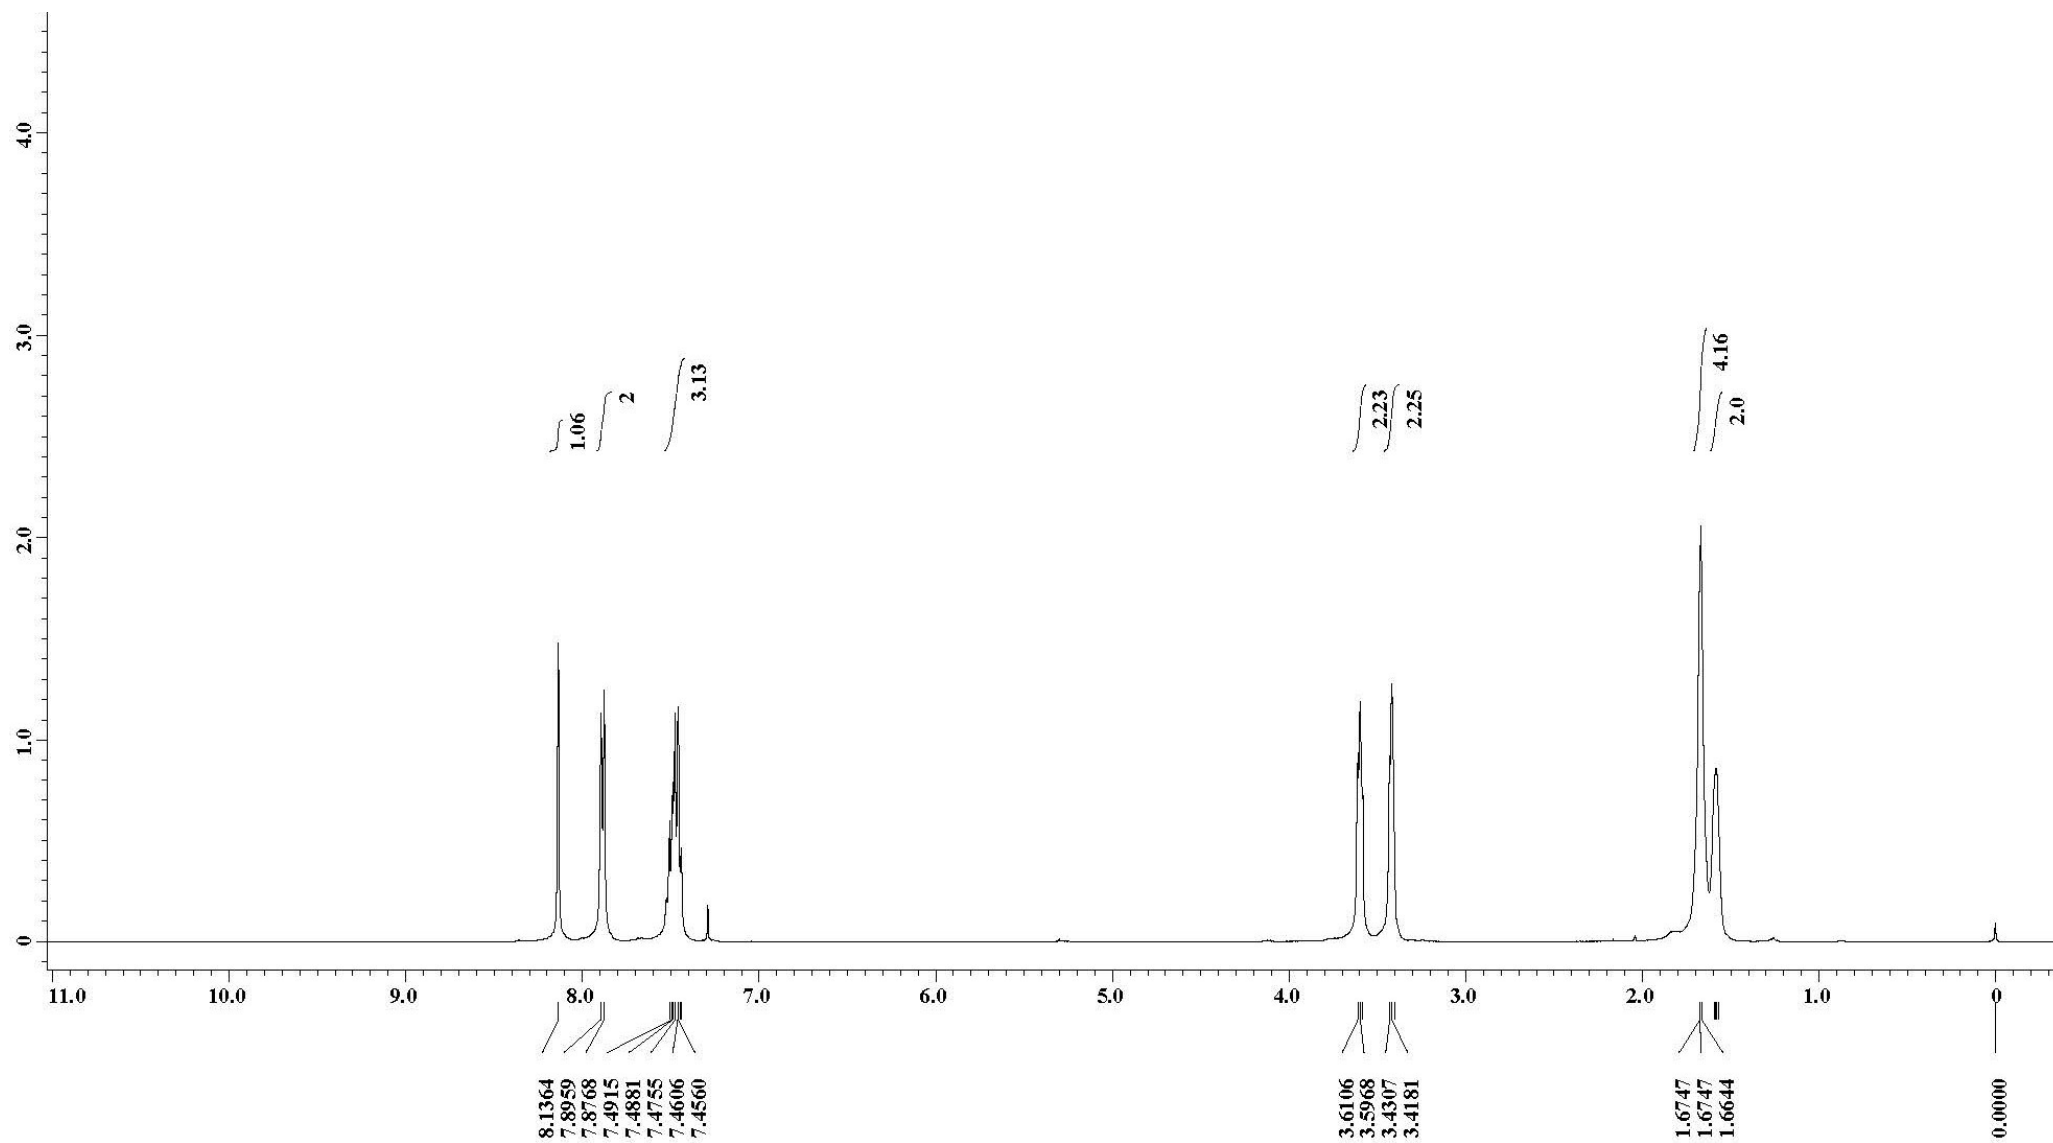



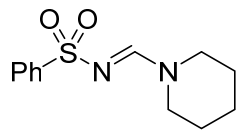

**12k**,  $^{13}\text{C}$  NMR (100 MHz,  $\text{CDCl}_3$ )

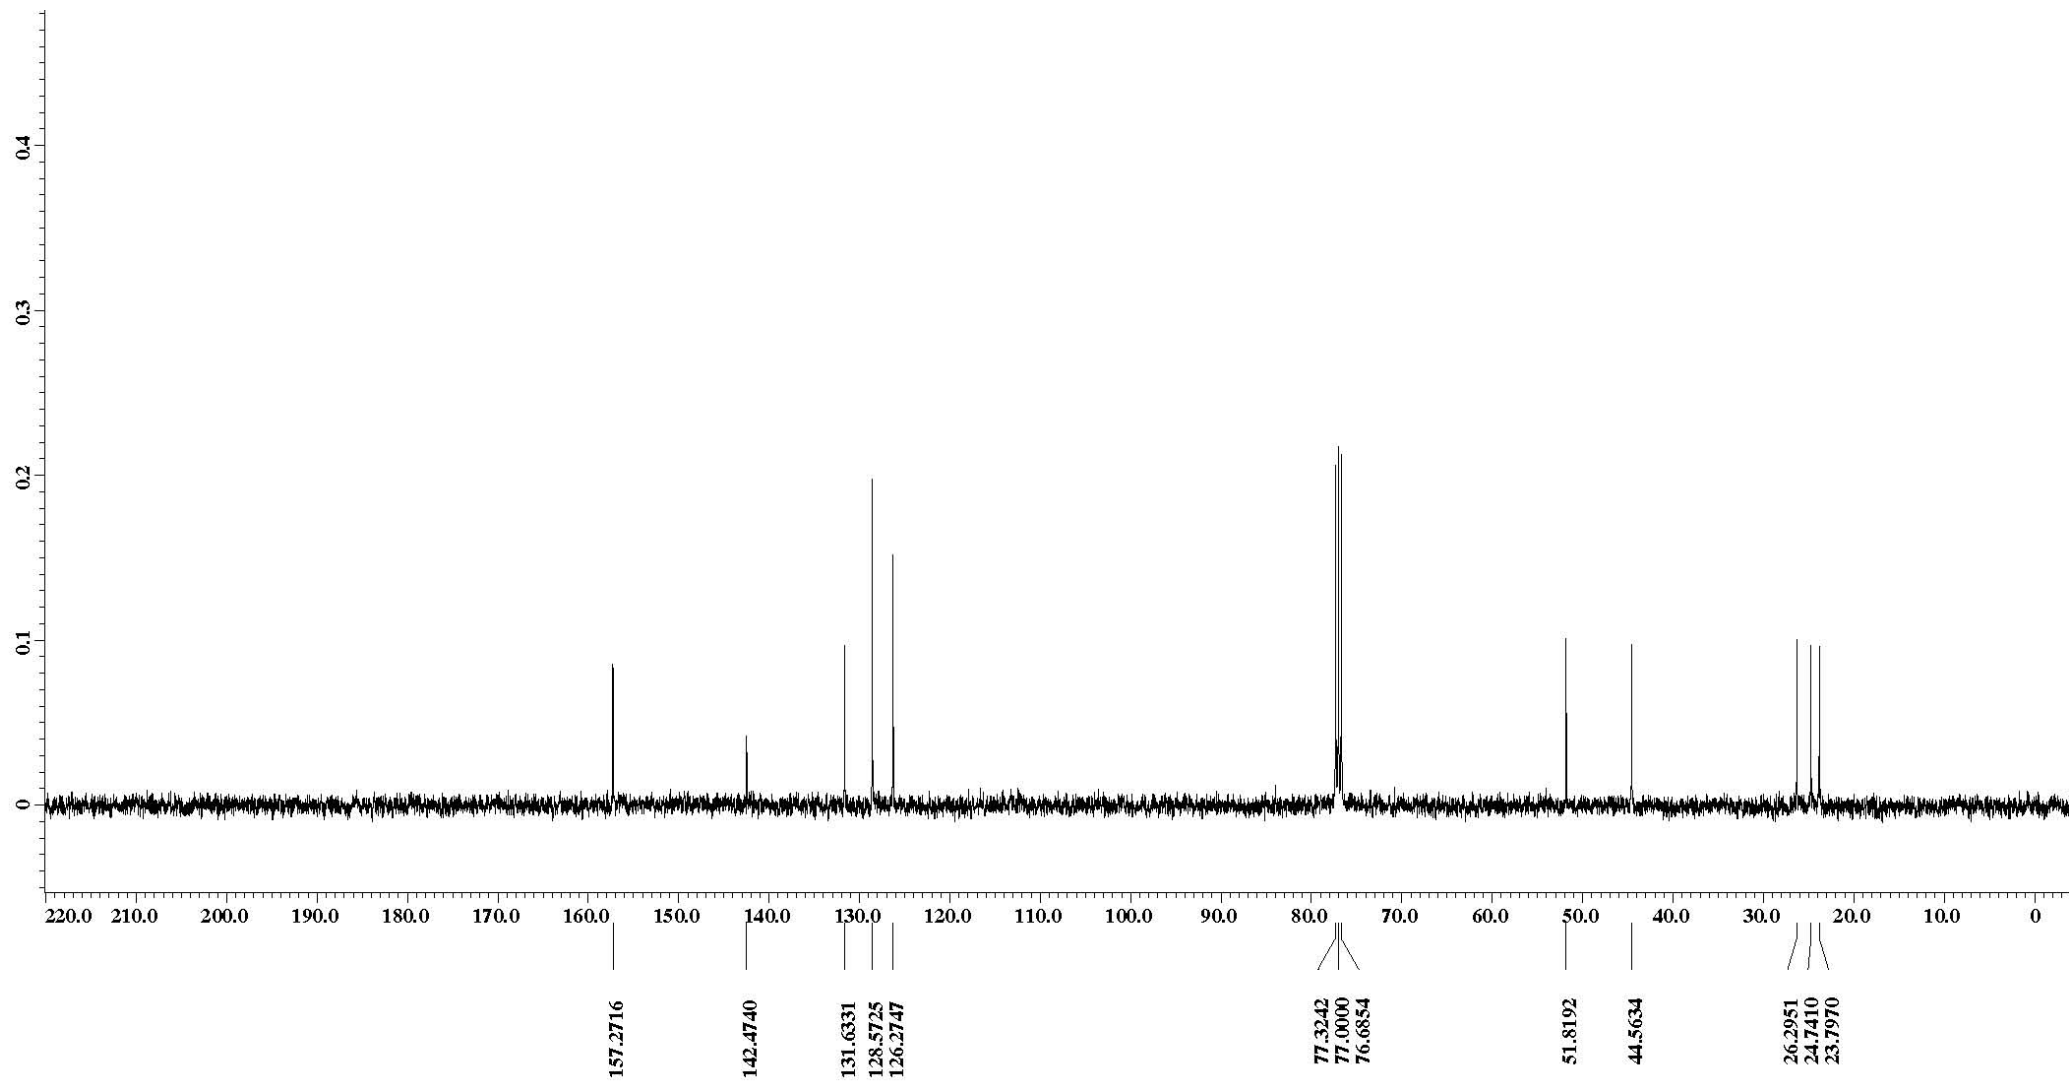

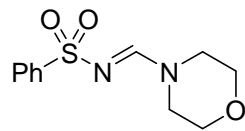

**12l**,  $^1\text{H}$  NMR (400 MHz,  $\text{CDCl}_3$ )

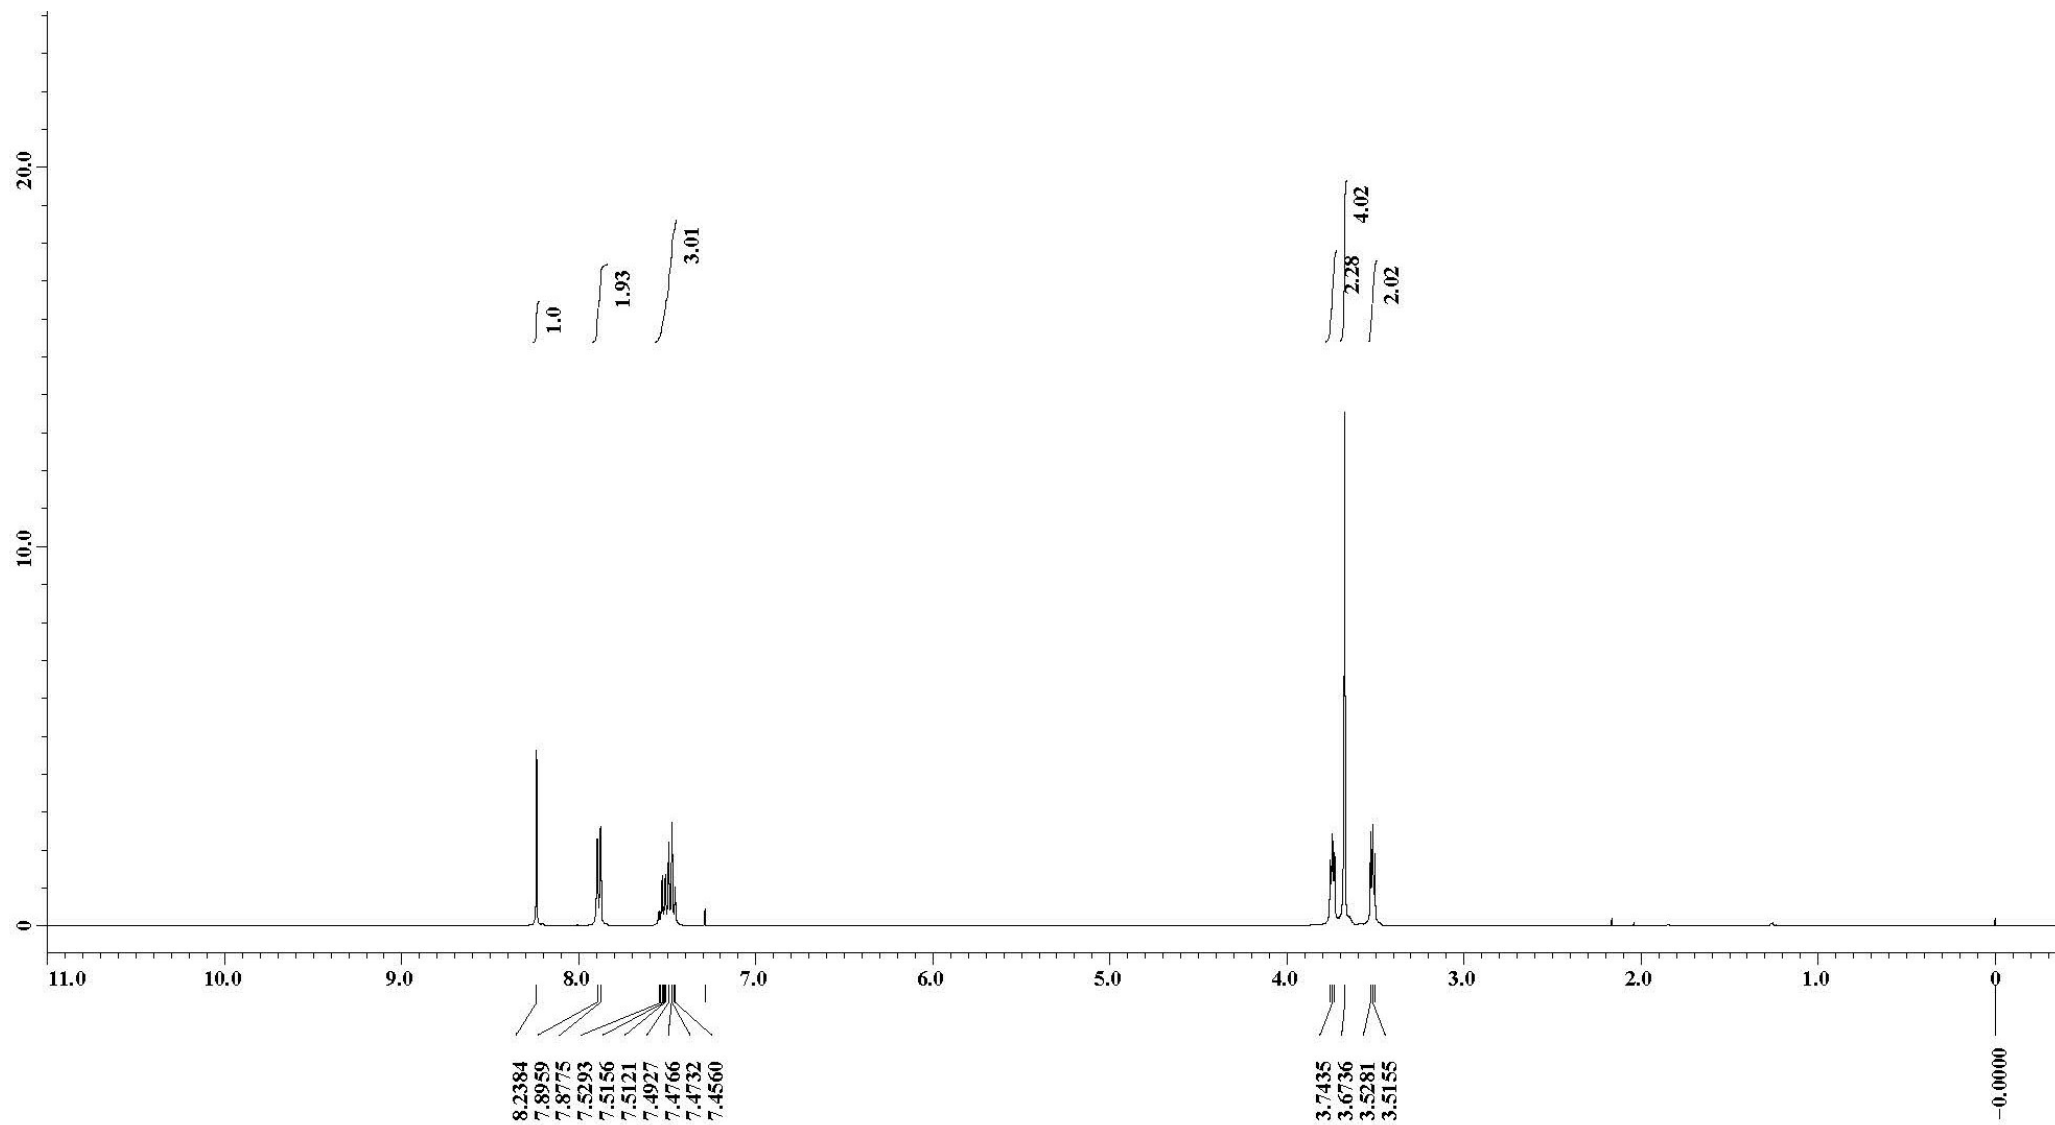

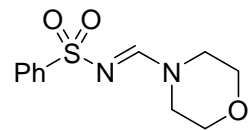

**121**,  $^{13}\text{C}$  NMR (100 MHz,  $\text{CDCl}_3$ )

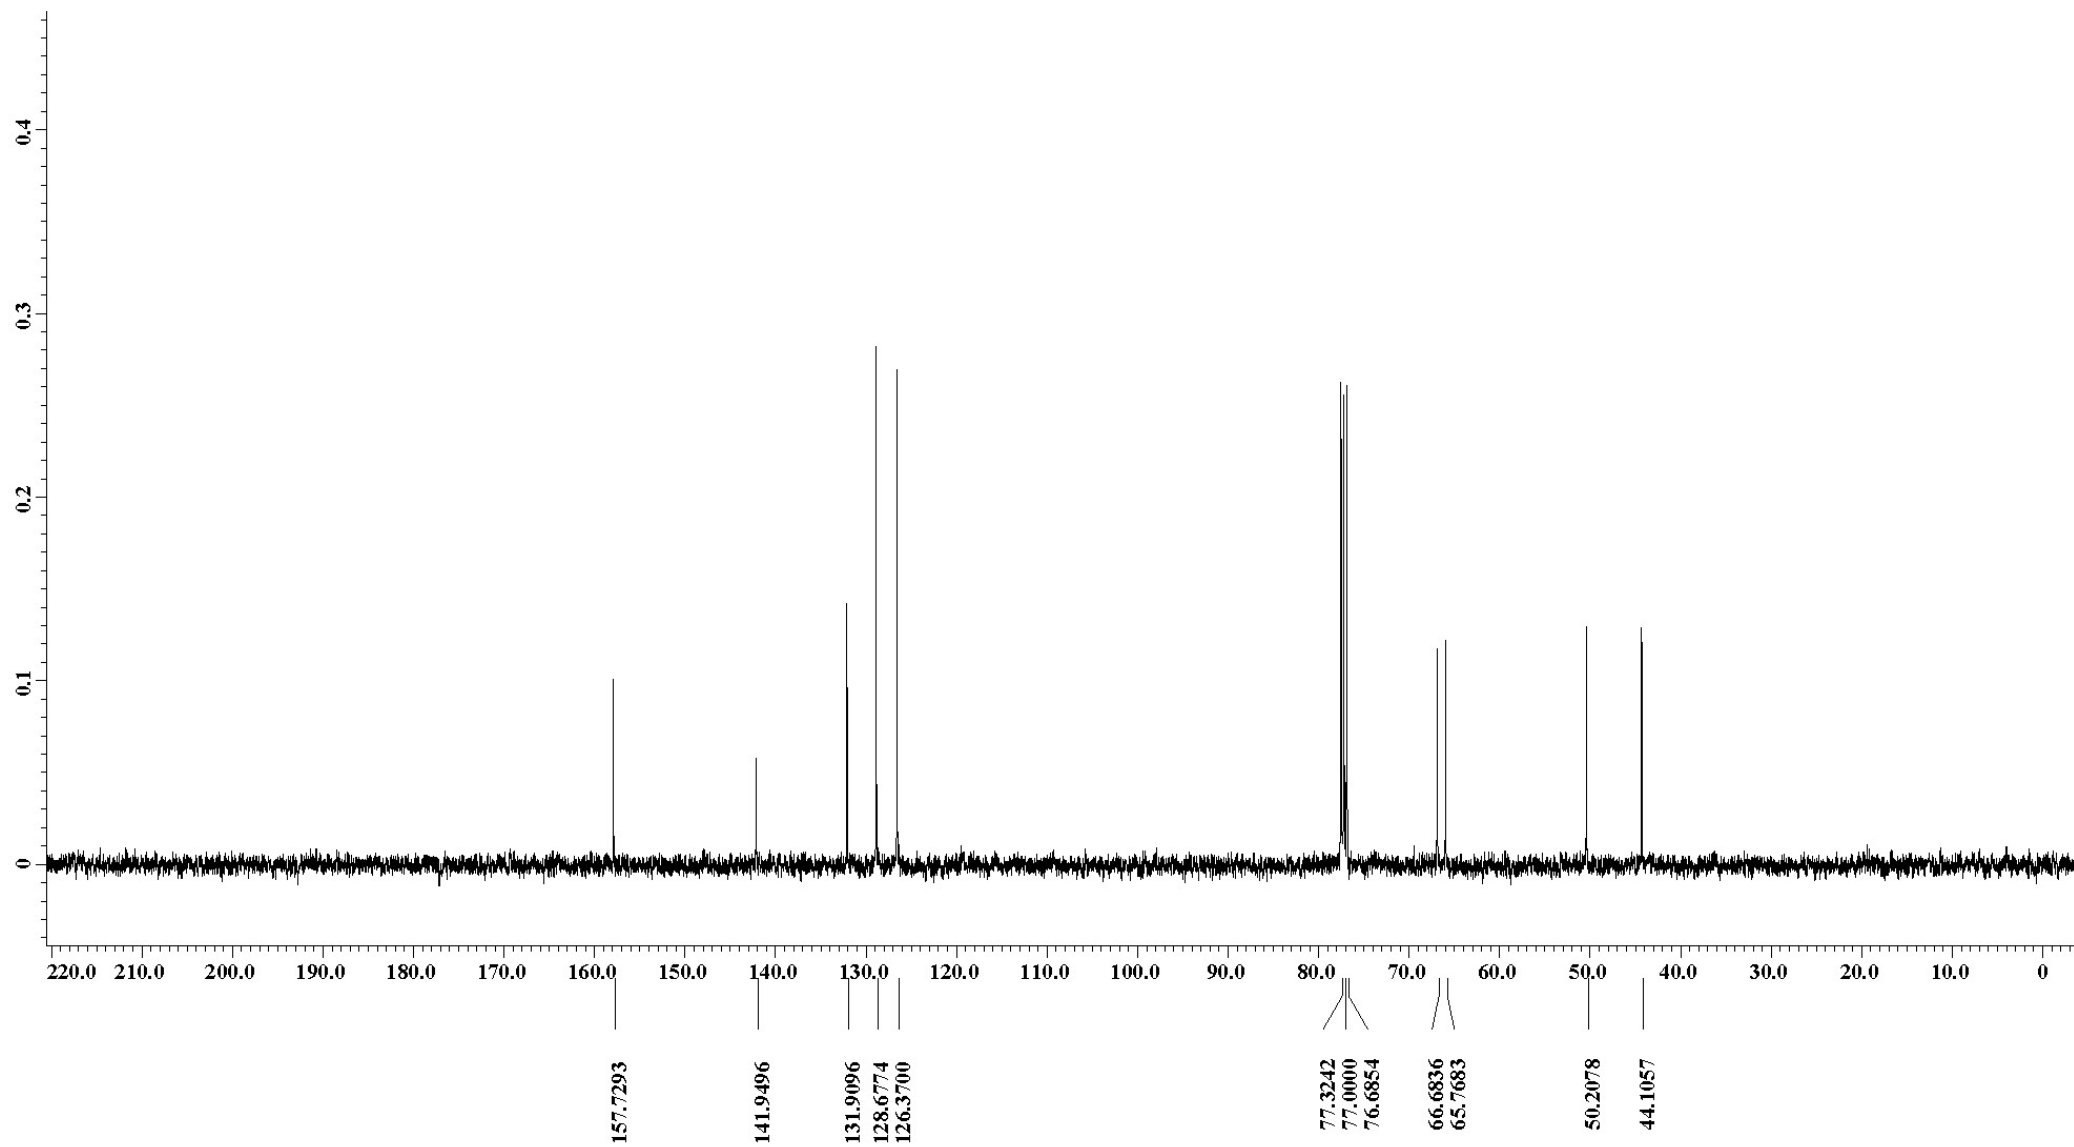

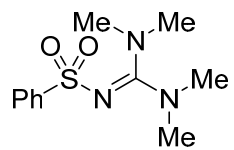

**12m**,  $^1\text{H}$  NMR (400 MHz,  $\text{CDCl}_3$ )

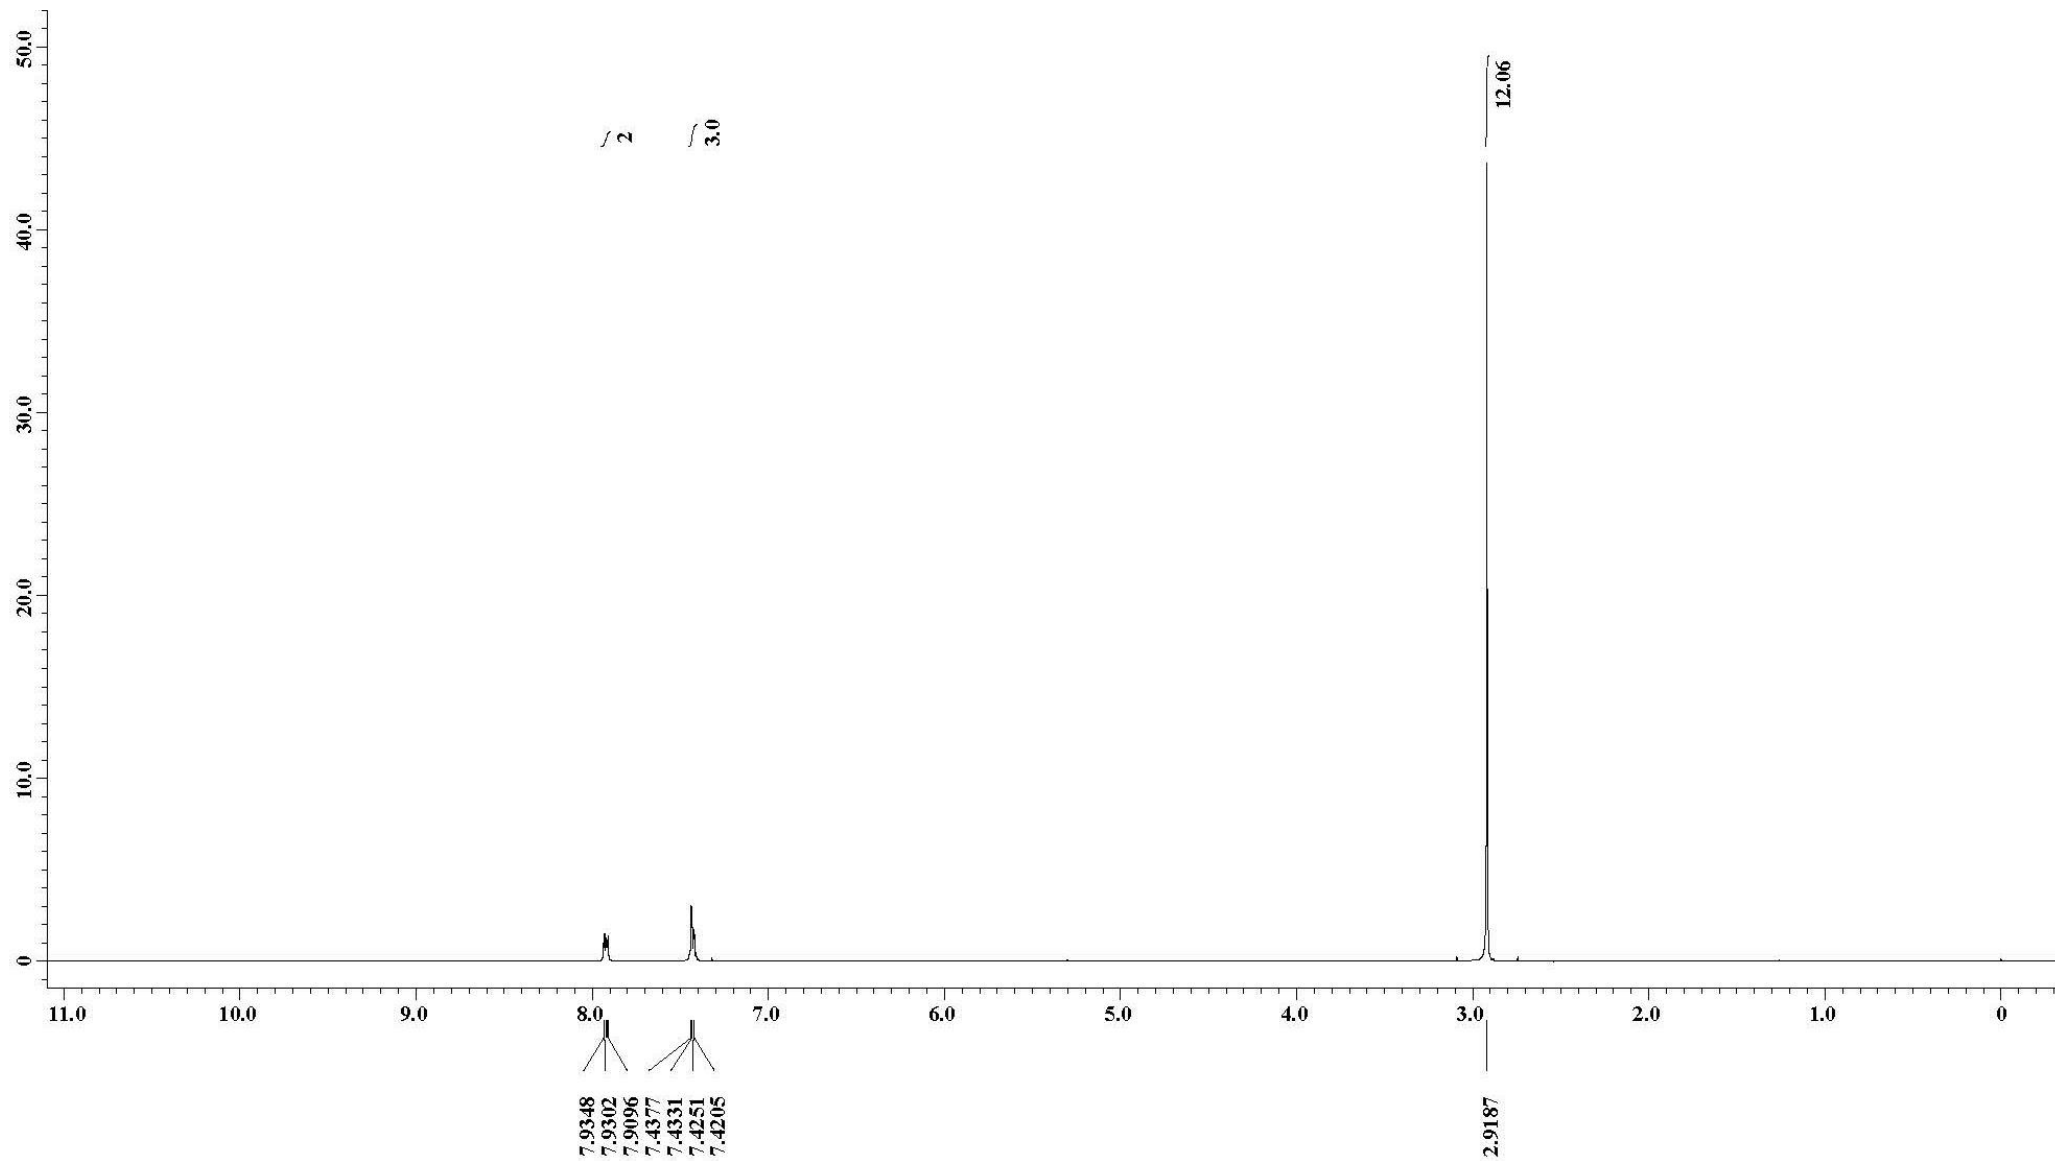

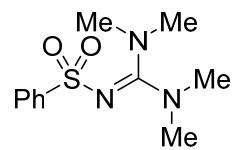

**12m**,  $^{13}\text{C}$  NMR (100 MHz,  $\text{CDCl}_3$ )

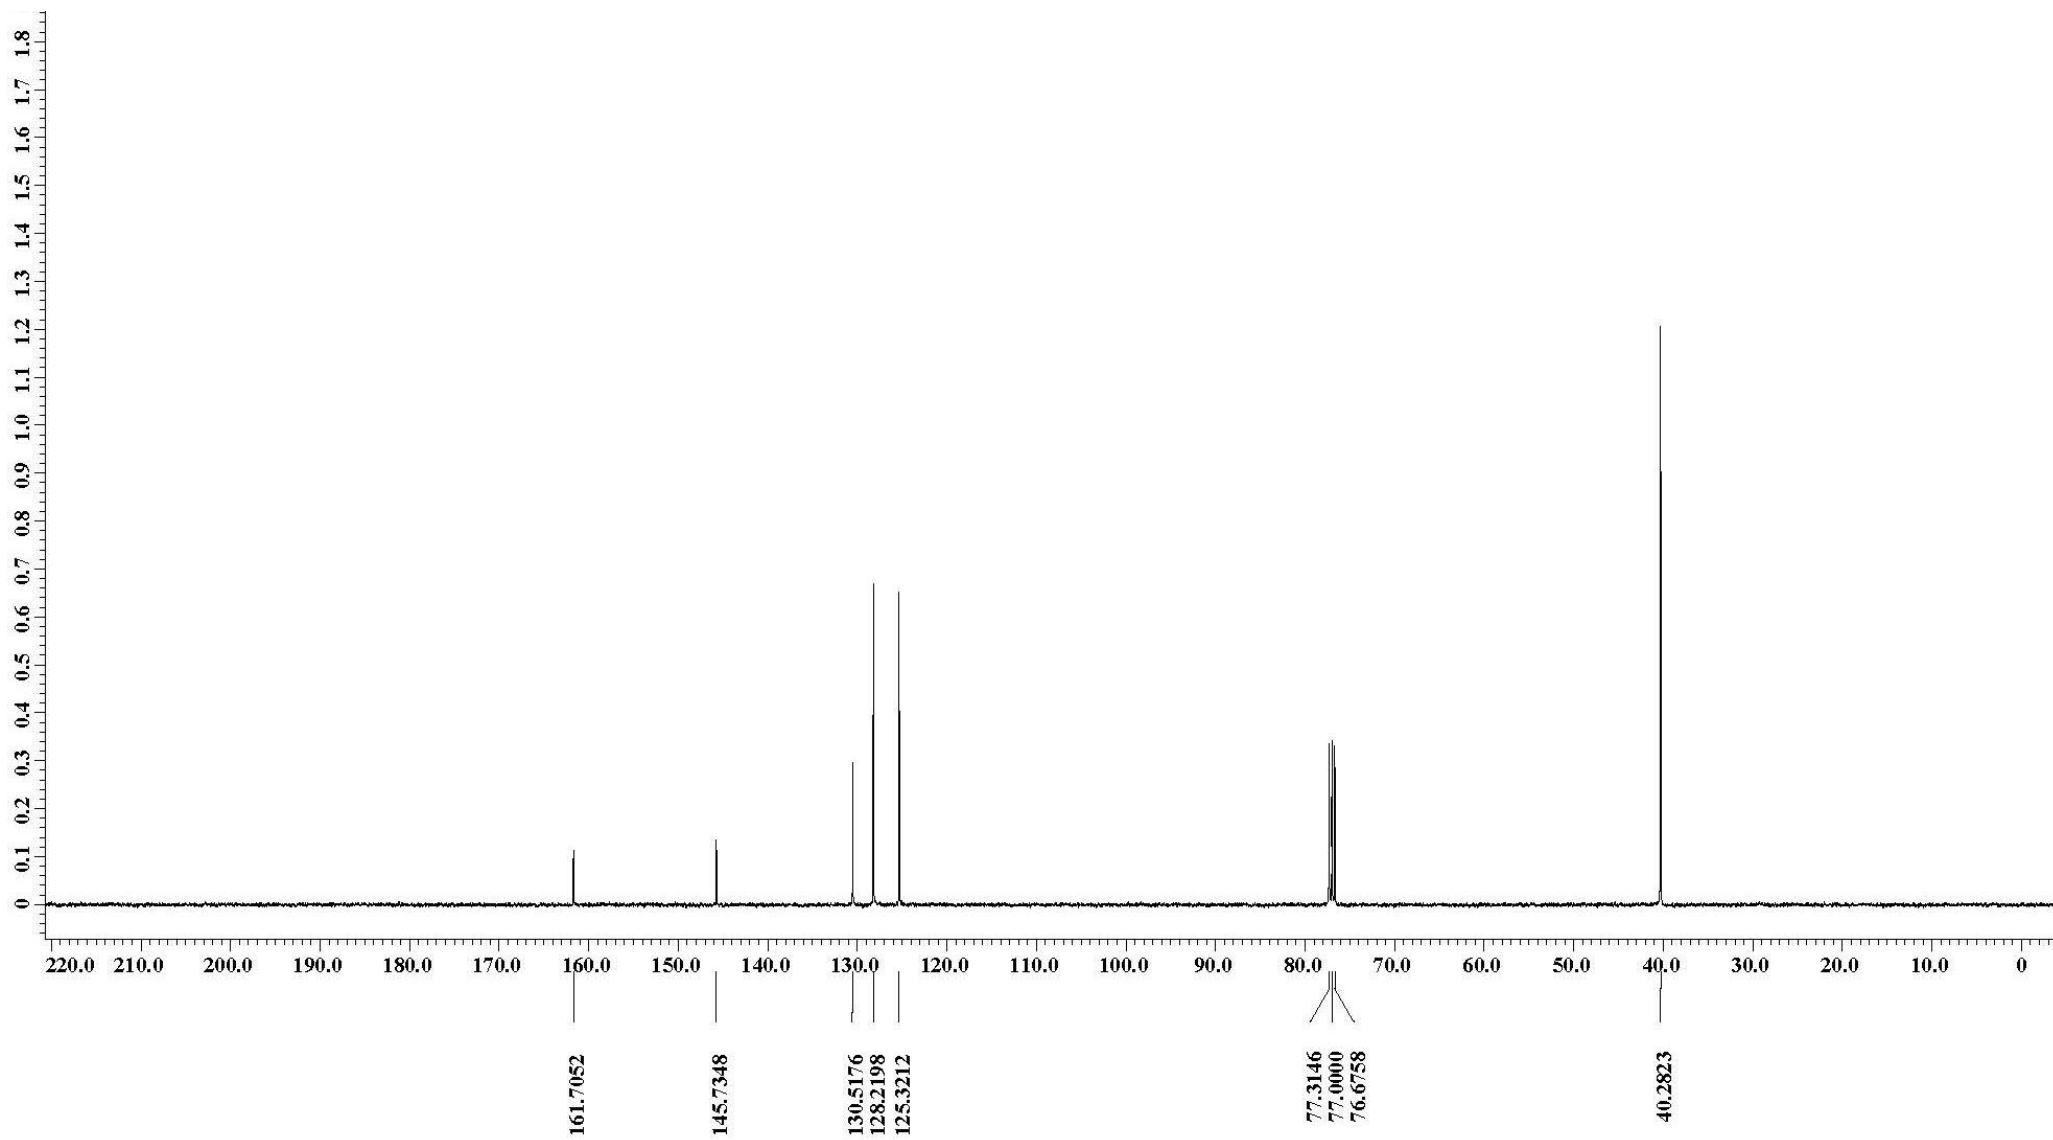

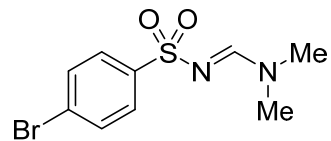

**12n**,  $^1\text{H}$  NMR (400 MHz,  $\text{CDCl}_3$ )

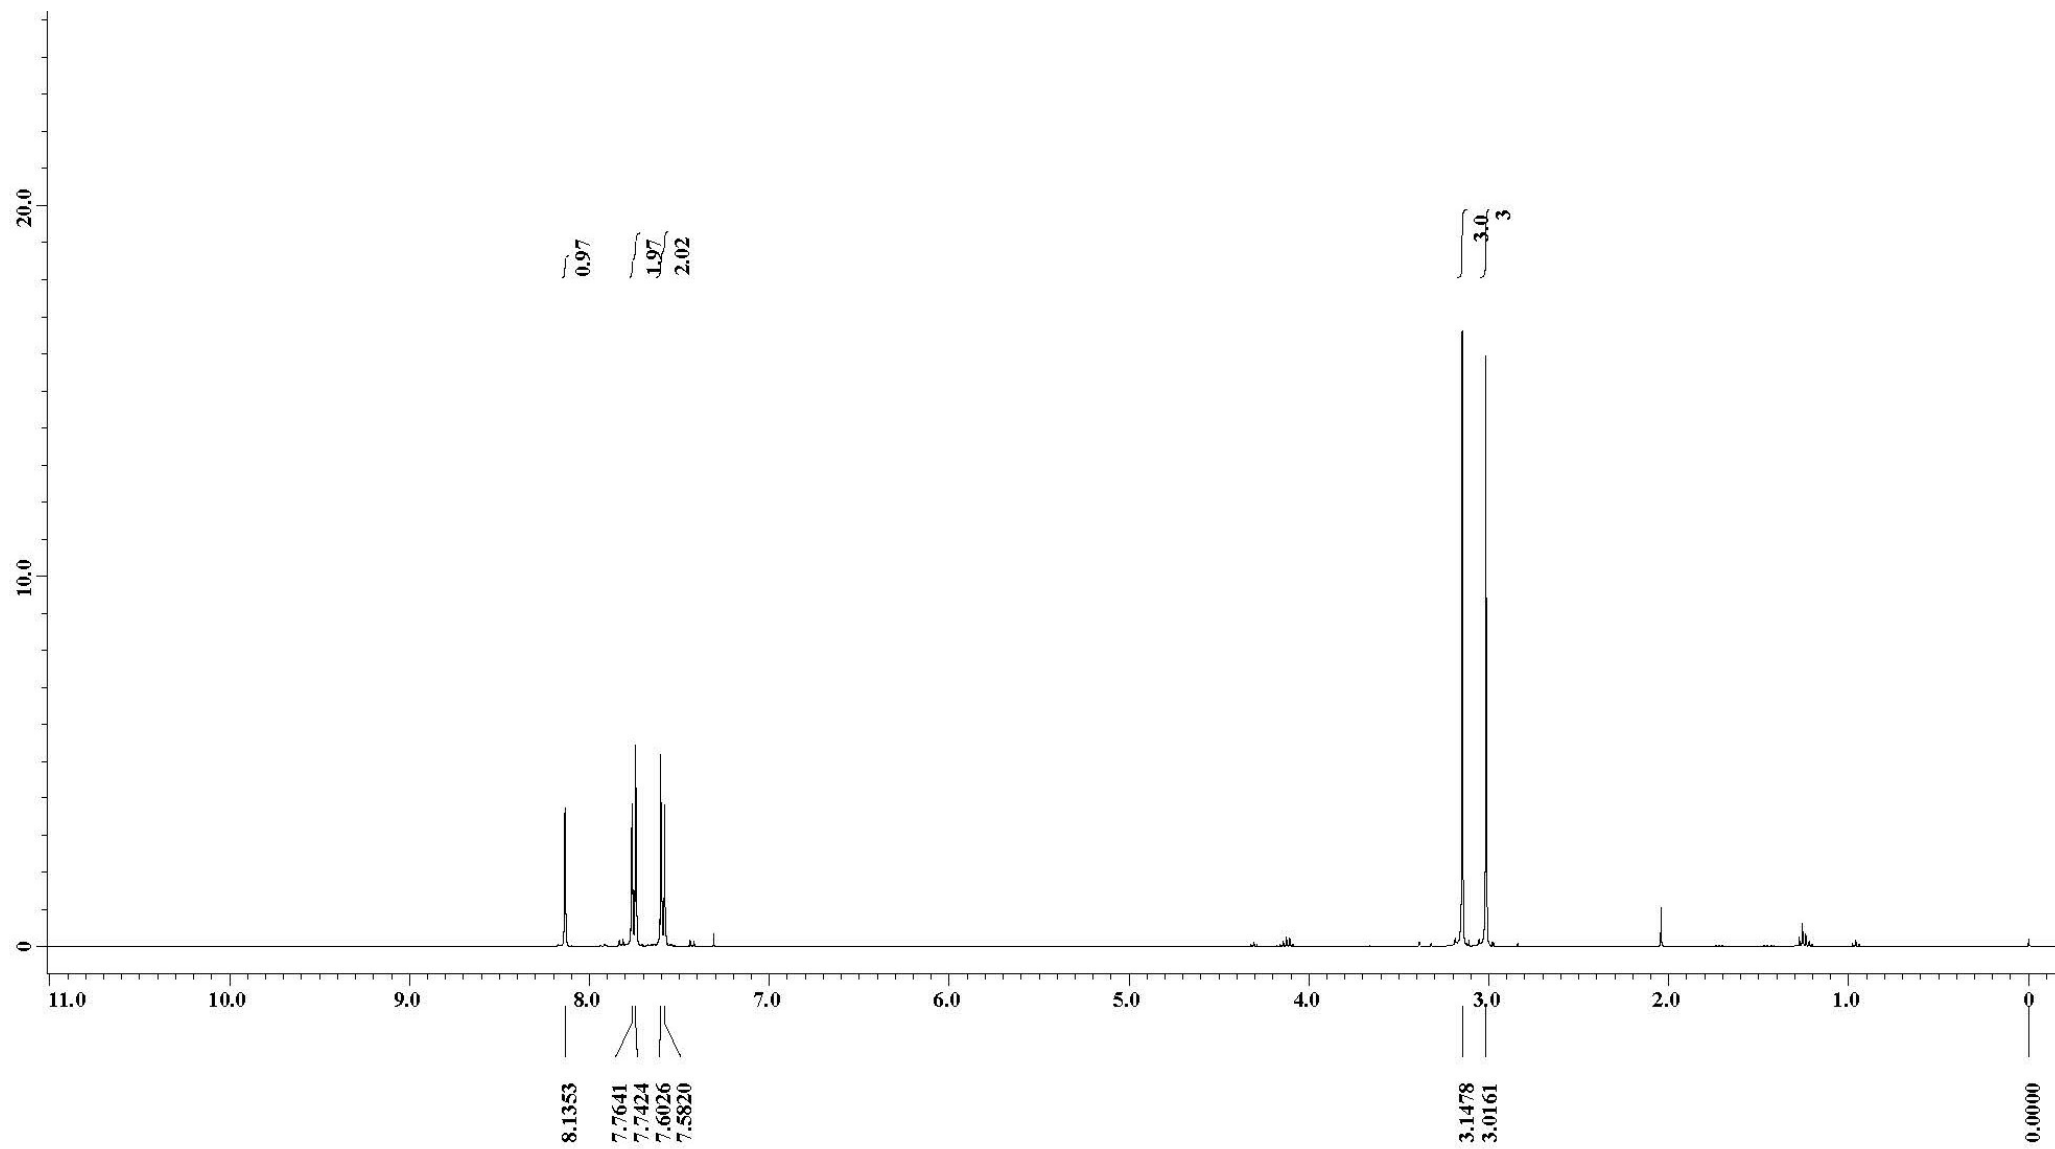

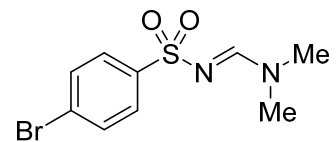

**12n**,  $^{13}\text{C}$  NMR (100 MHz,  $\text{CDCl}_3$ )

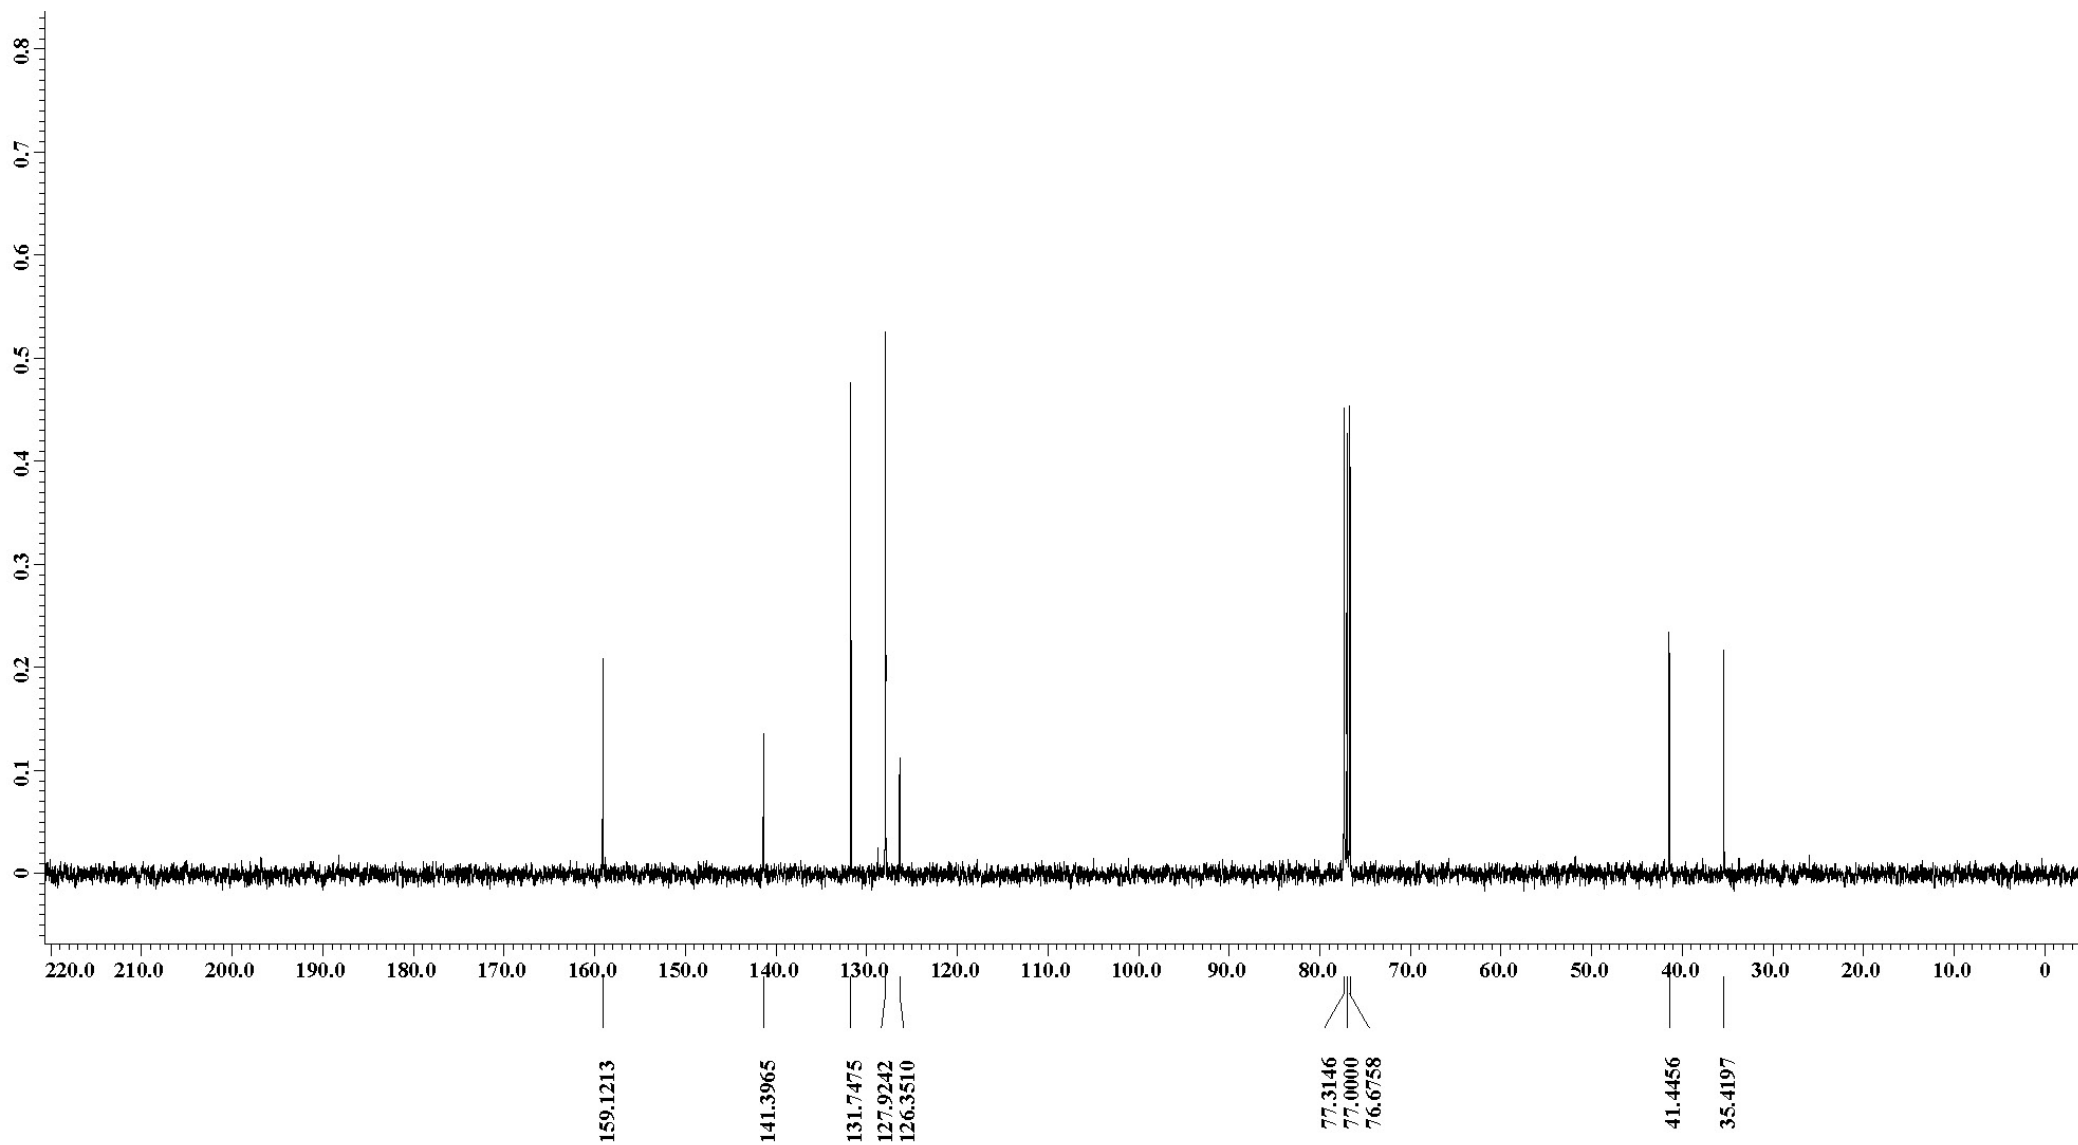

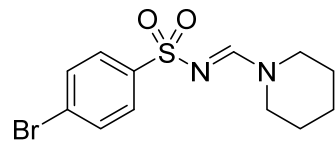

**12o**,  $^1\text{H}$  NMR (400 MHz,  $\text{CDCl}_3$ )

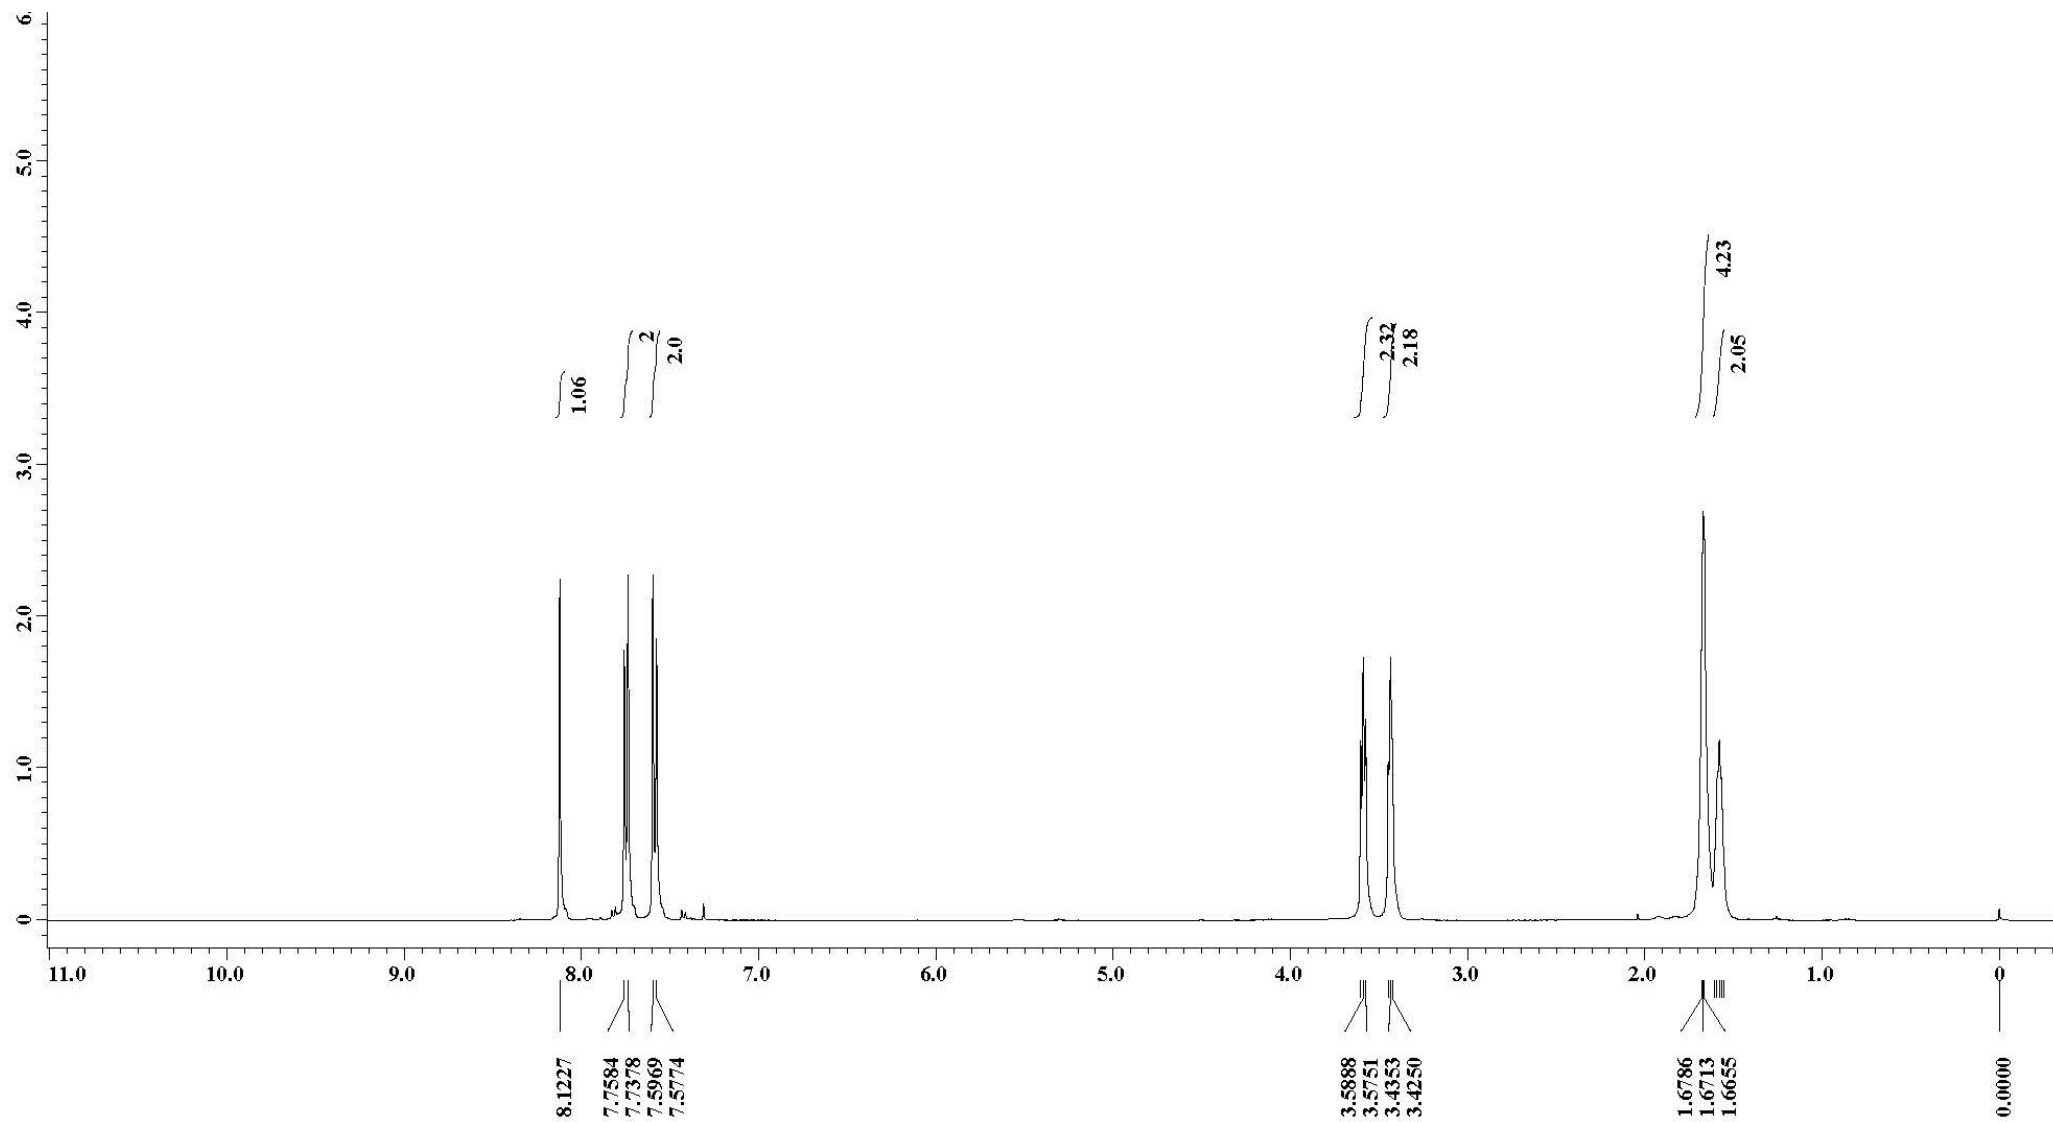



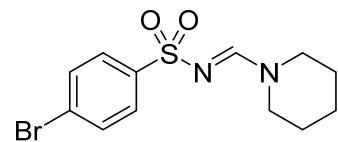

**12o**,  $^{13}\text{C}$  NMR (100 MHz,  $\text{CDCl}_3$ )

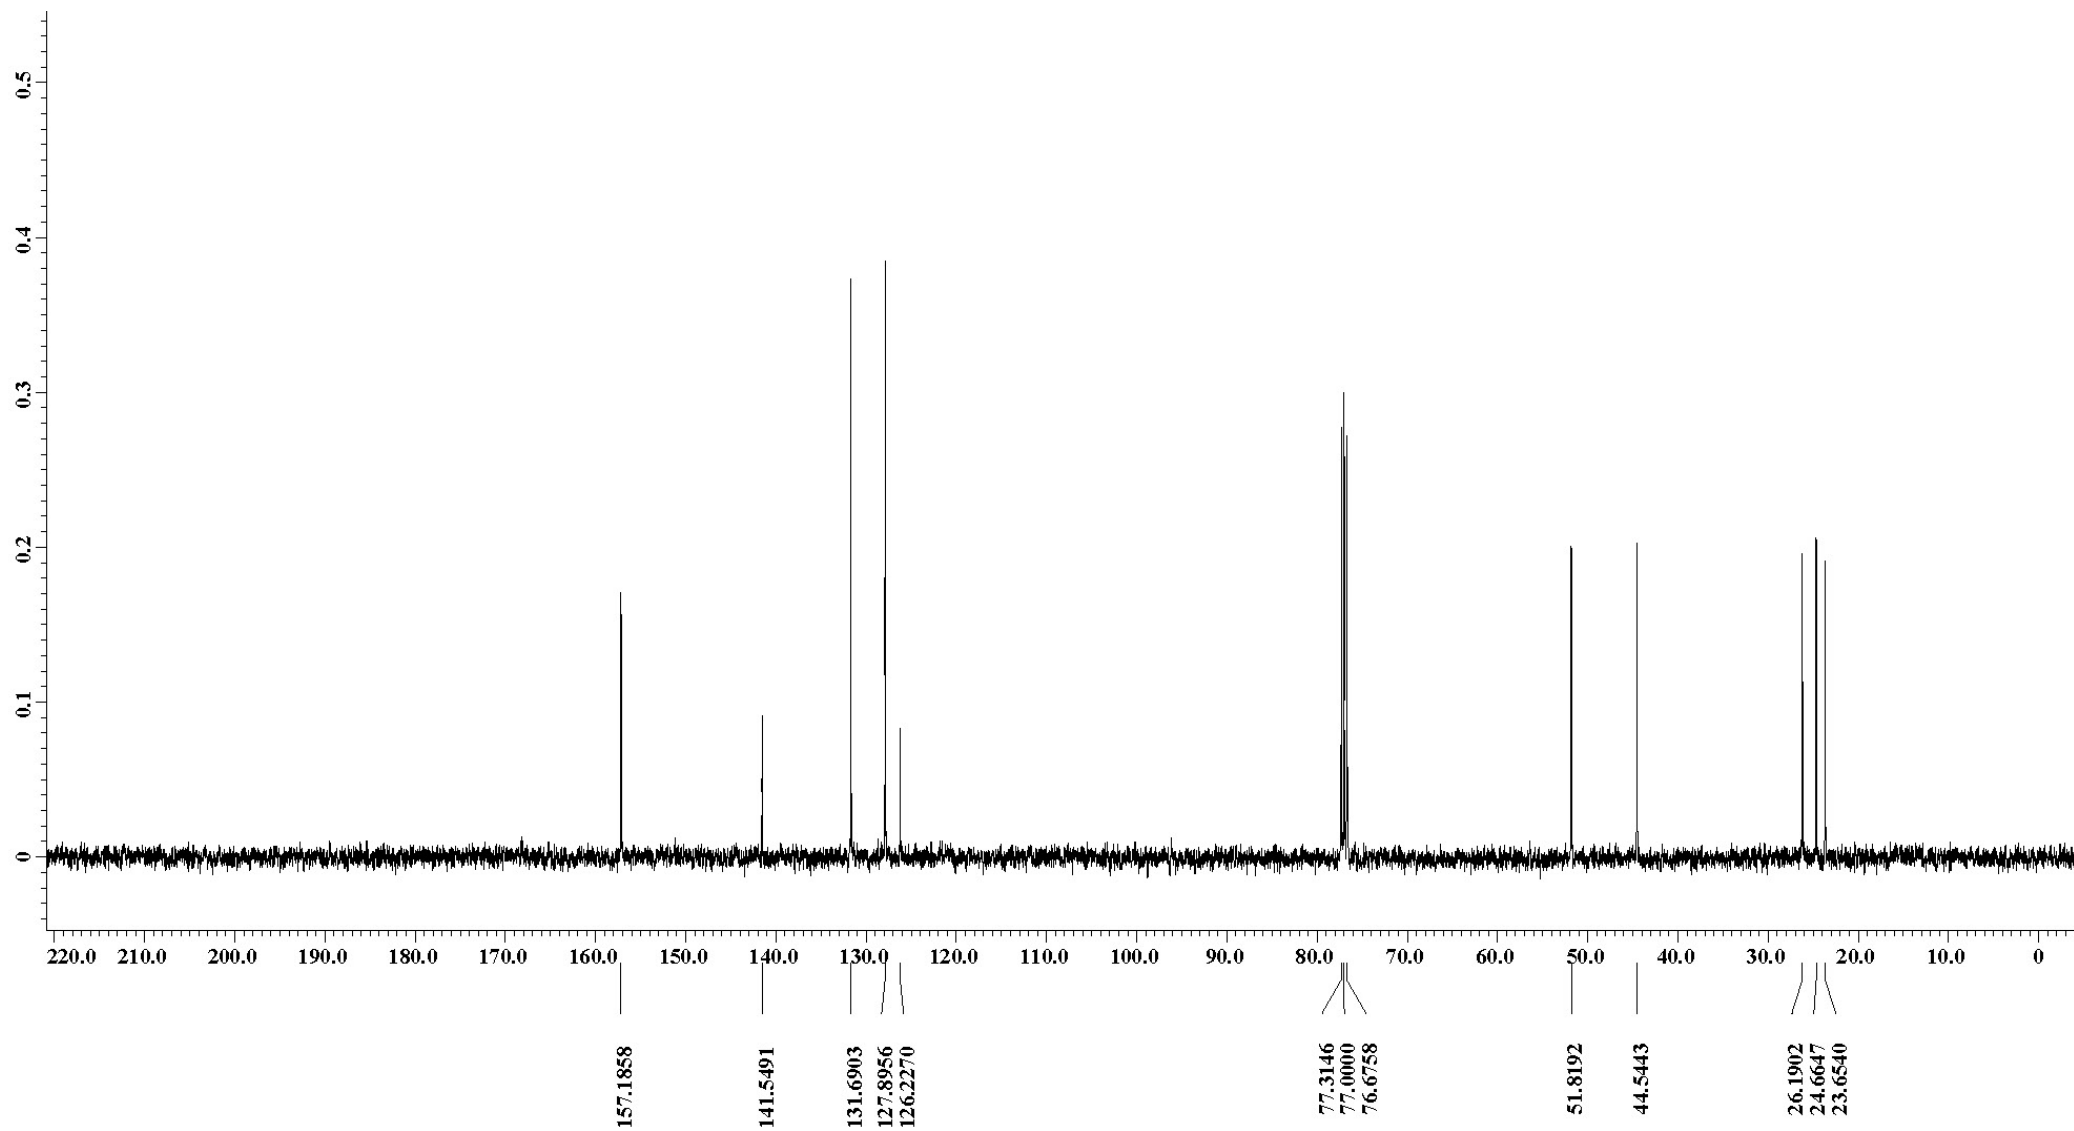

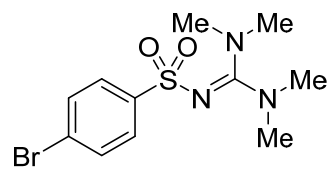

**12p**,  $^1\text{H}$  NMR (400 MHz,  $\text{CDCl}_3$ )

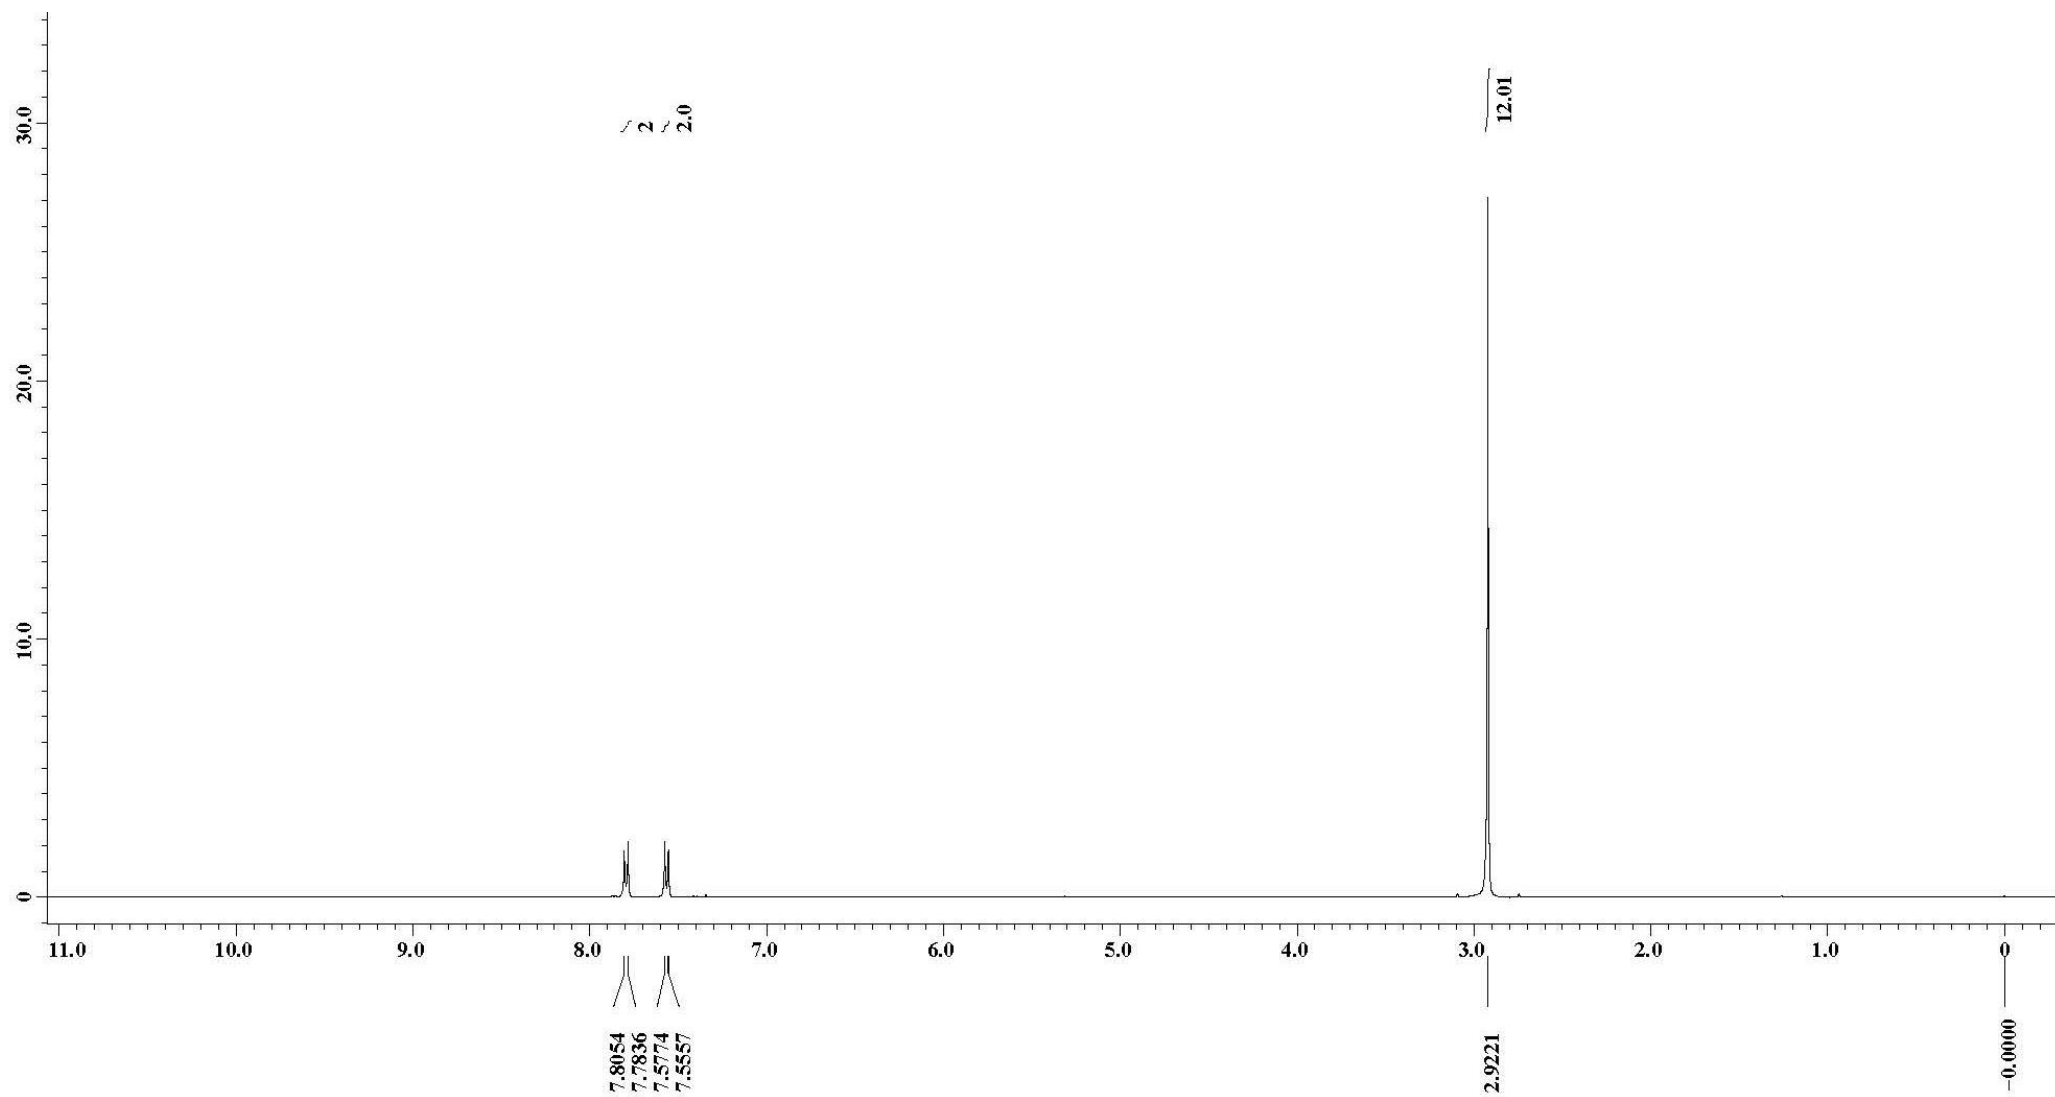

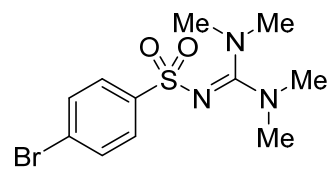

**12p**,  $^{13}\text{C}$  NMR (100 MHz,  $\text{CDCl}_3$ )

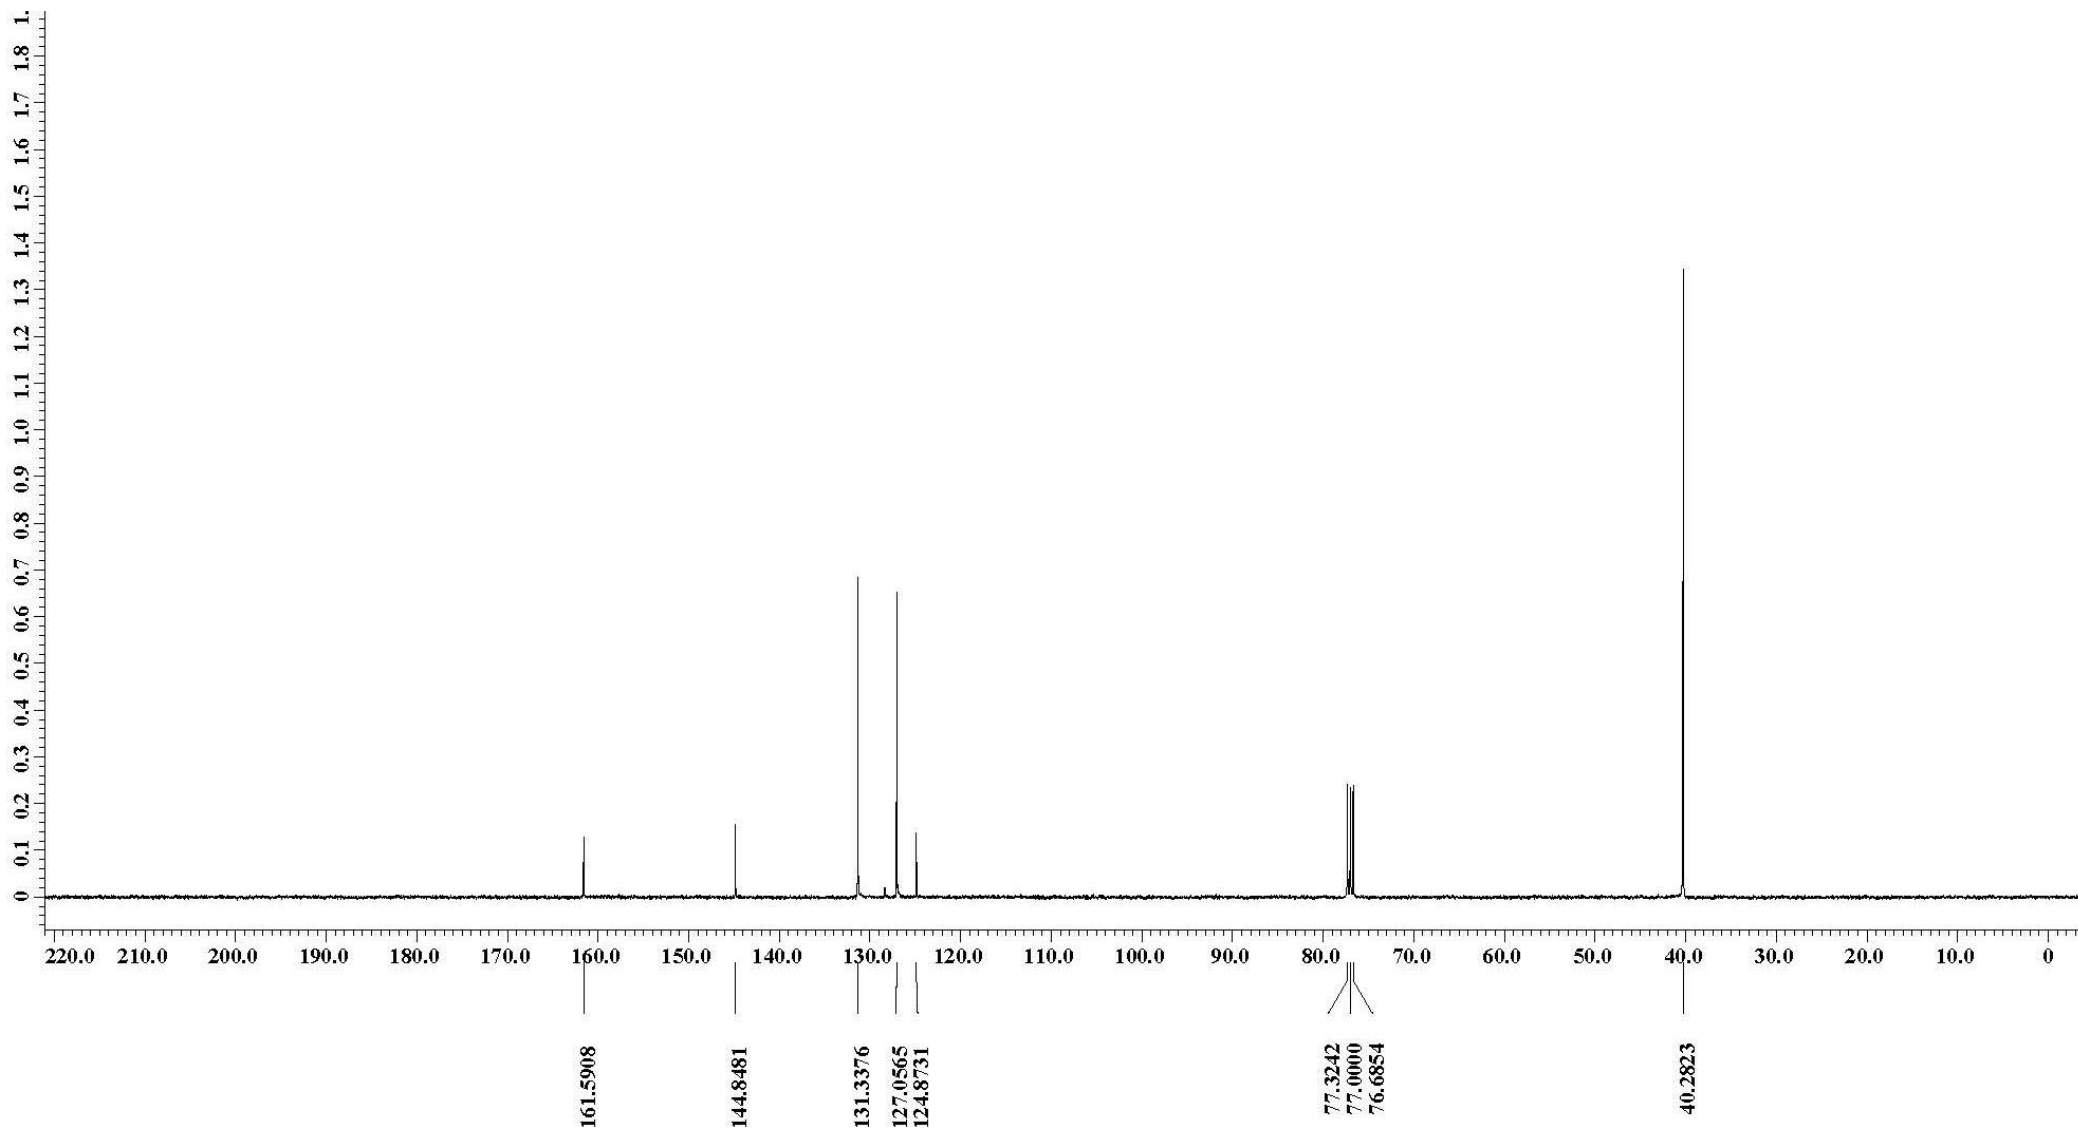

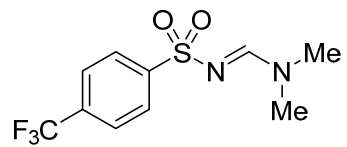

**12q**,  $^1\text{H}$  NMR (400 MHz, DMSO- $d_6$ )

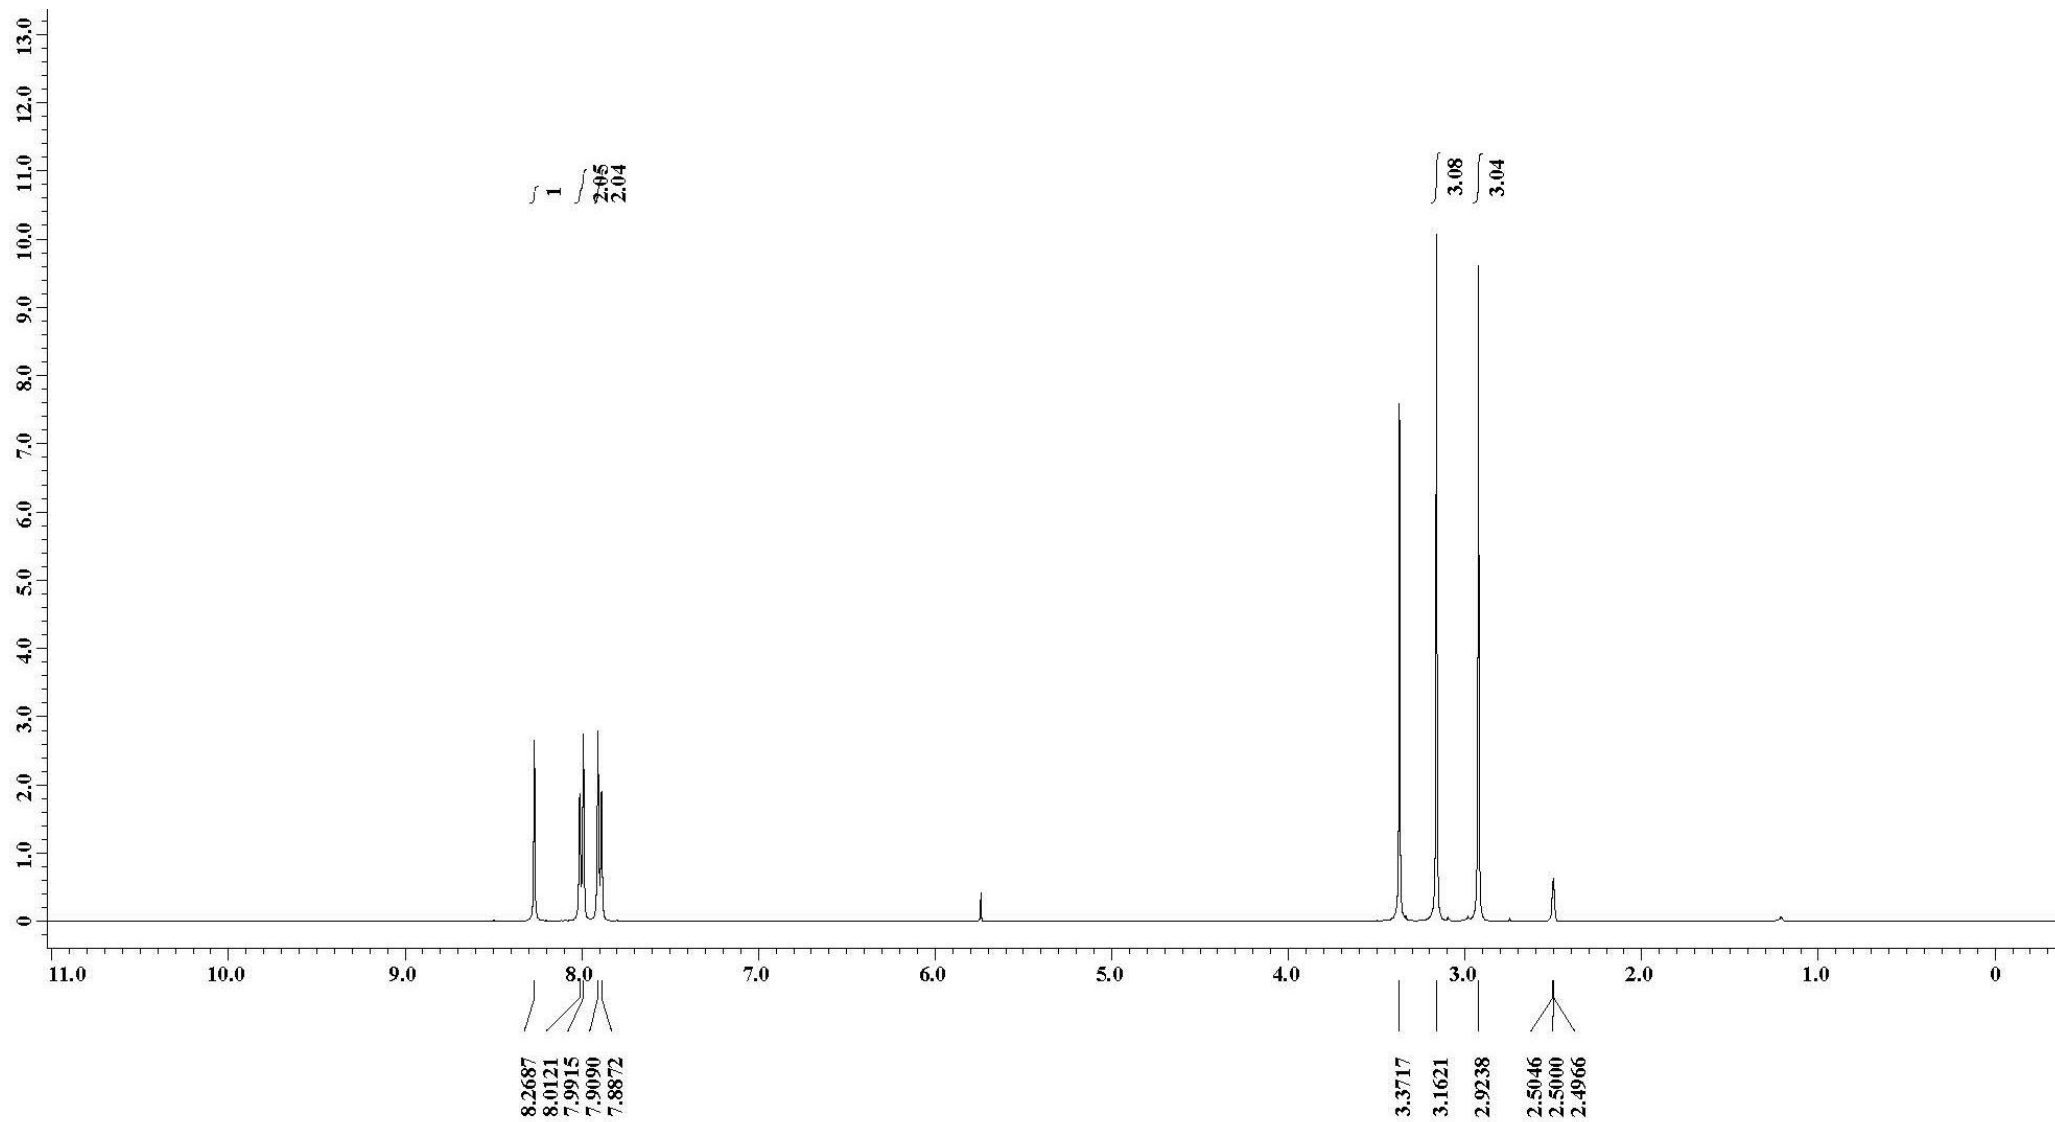

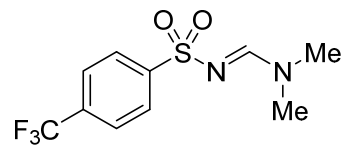

**12q**,  $^{13}\text{C}$  NMR (100 MHz,  $\text{DMSO-}d_6$ )

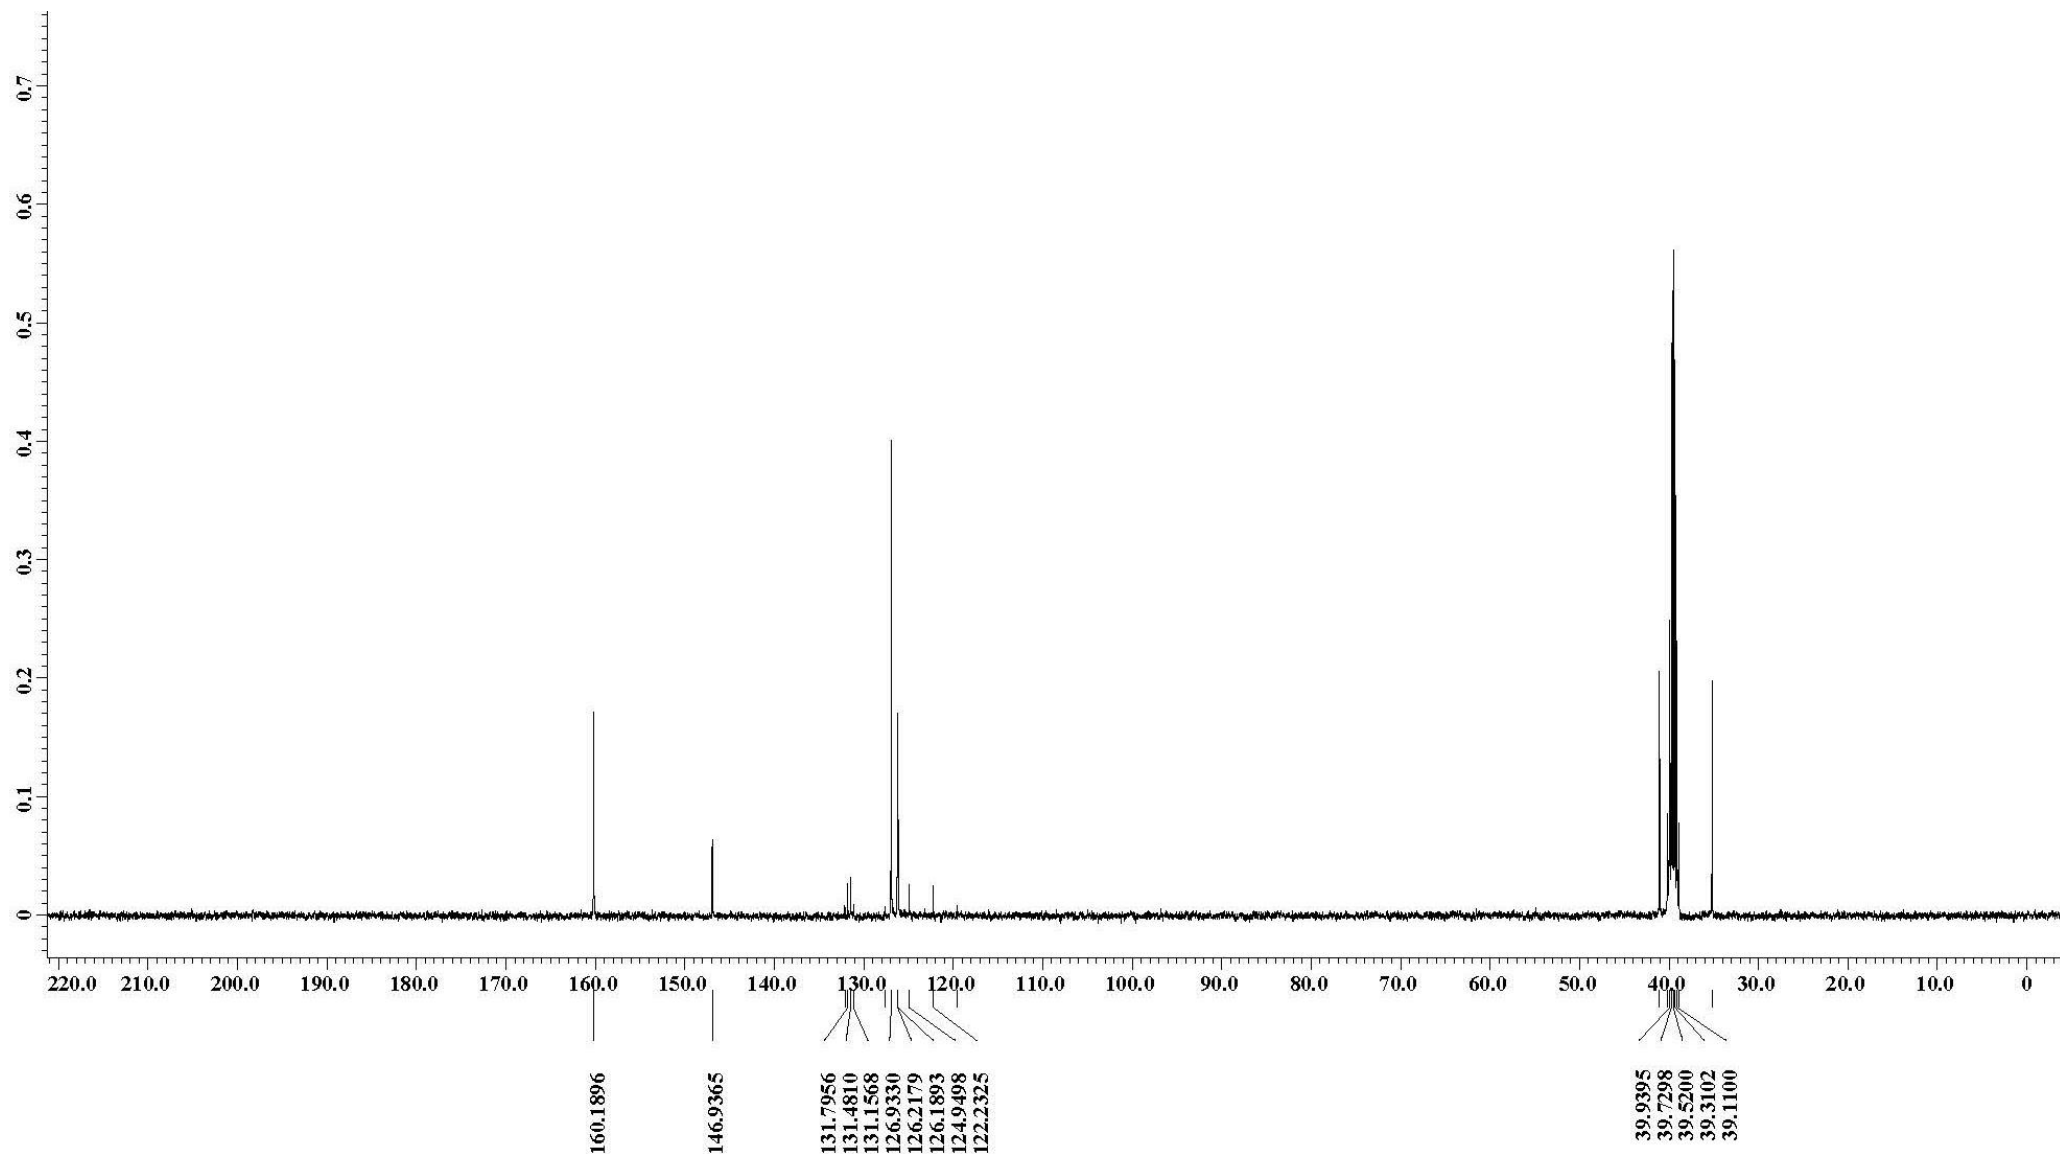

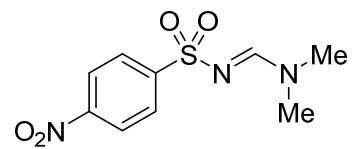

**12r**,  $^1\text{H}$  NMR (400 MHz,  $\text{CDCl}_3$ )

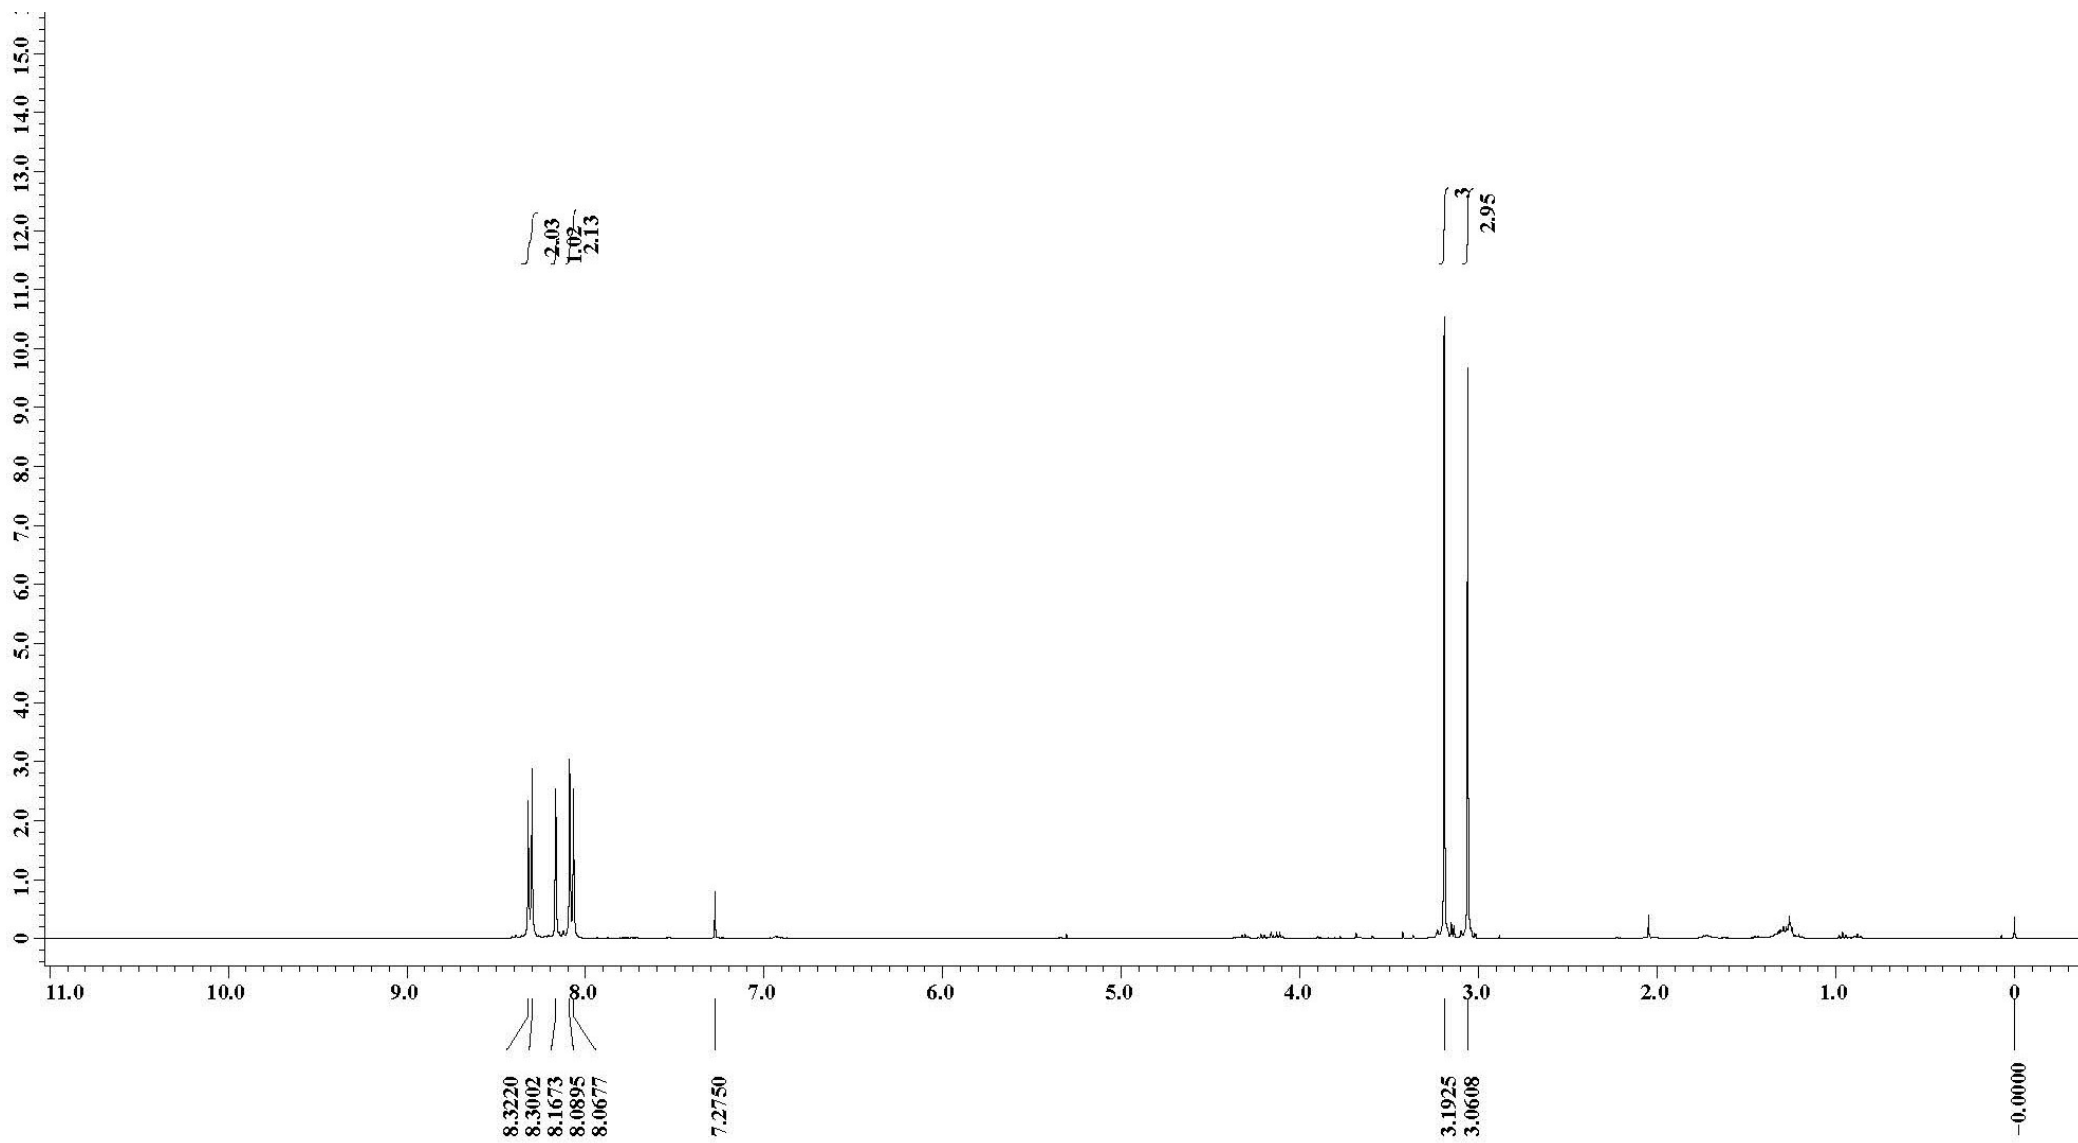

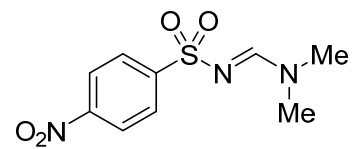

**12r**,  $^{13}\text{C}$  NMR (100 MHz,  $\text{CDCl}_3$ )

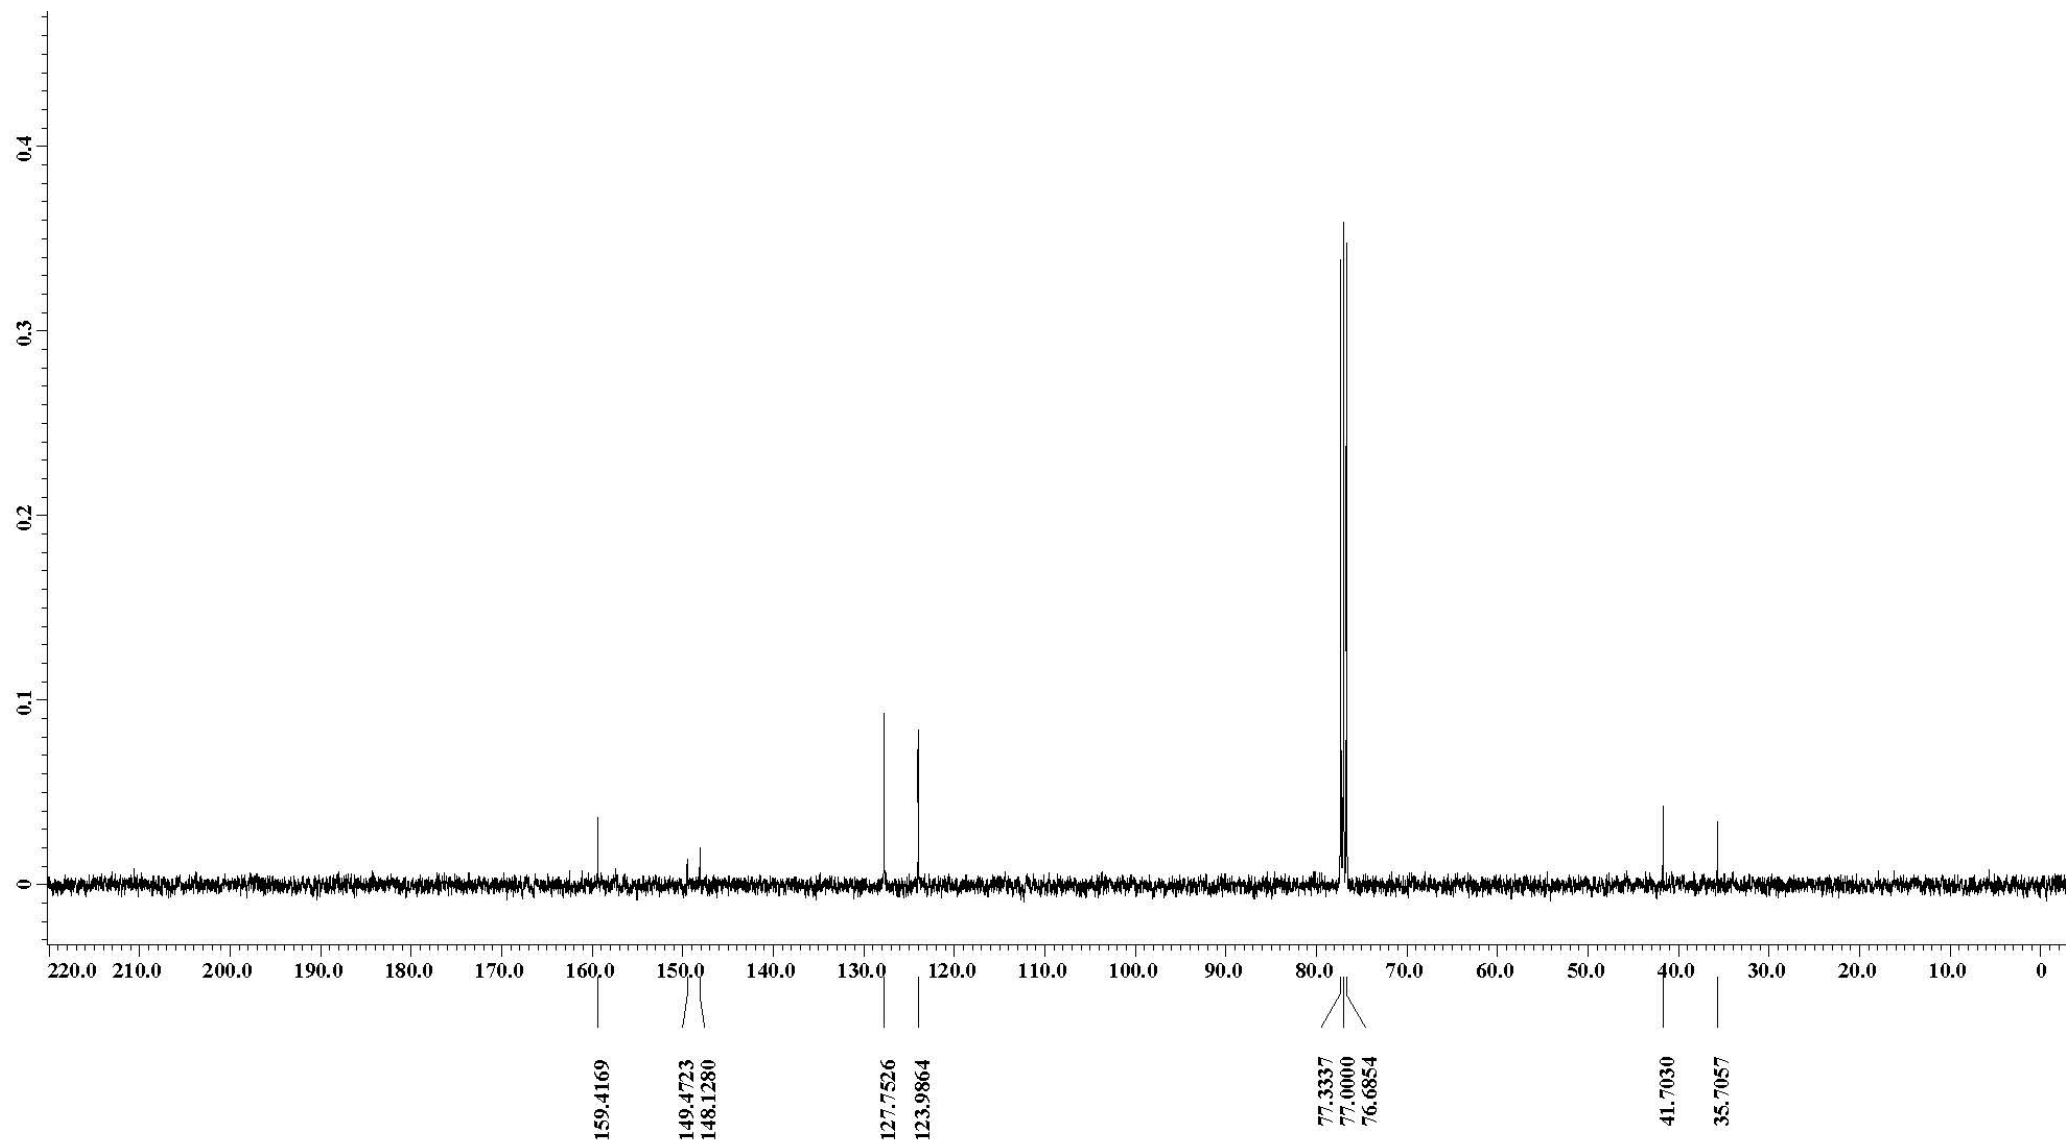

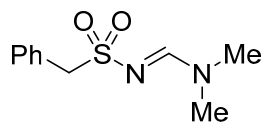

**12s**,  $^1\text{H}$  NMR (300 MHz,  $\text{CDCl}_3$ )

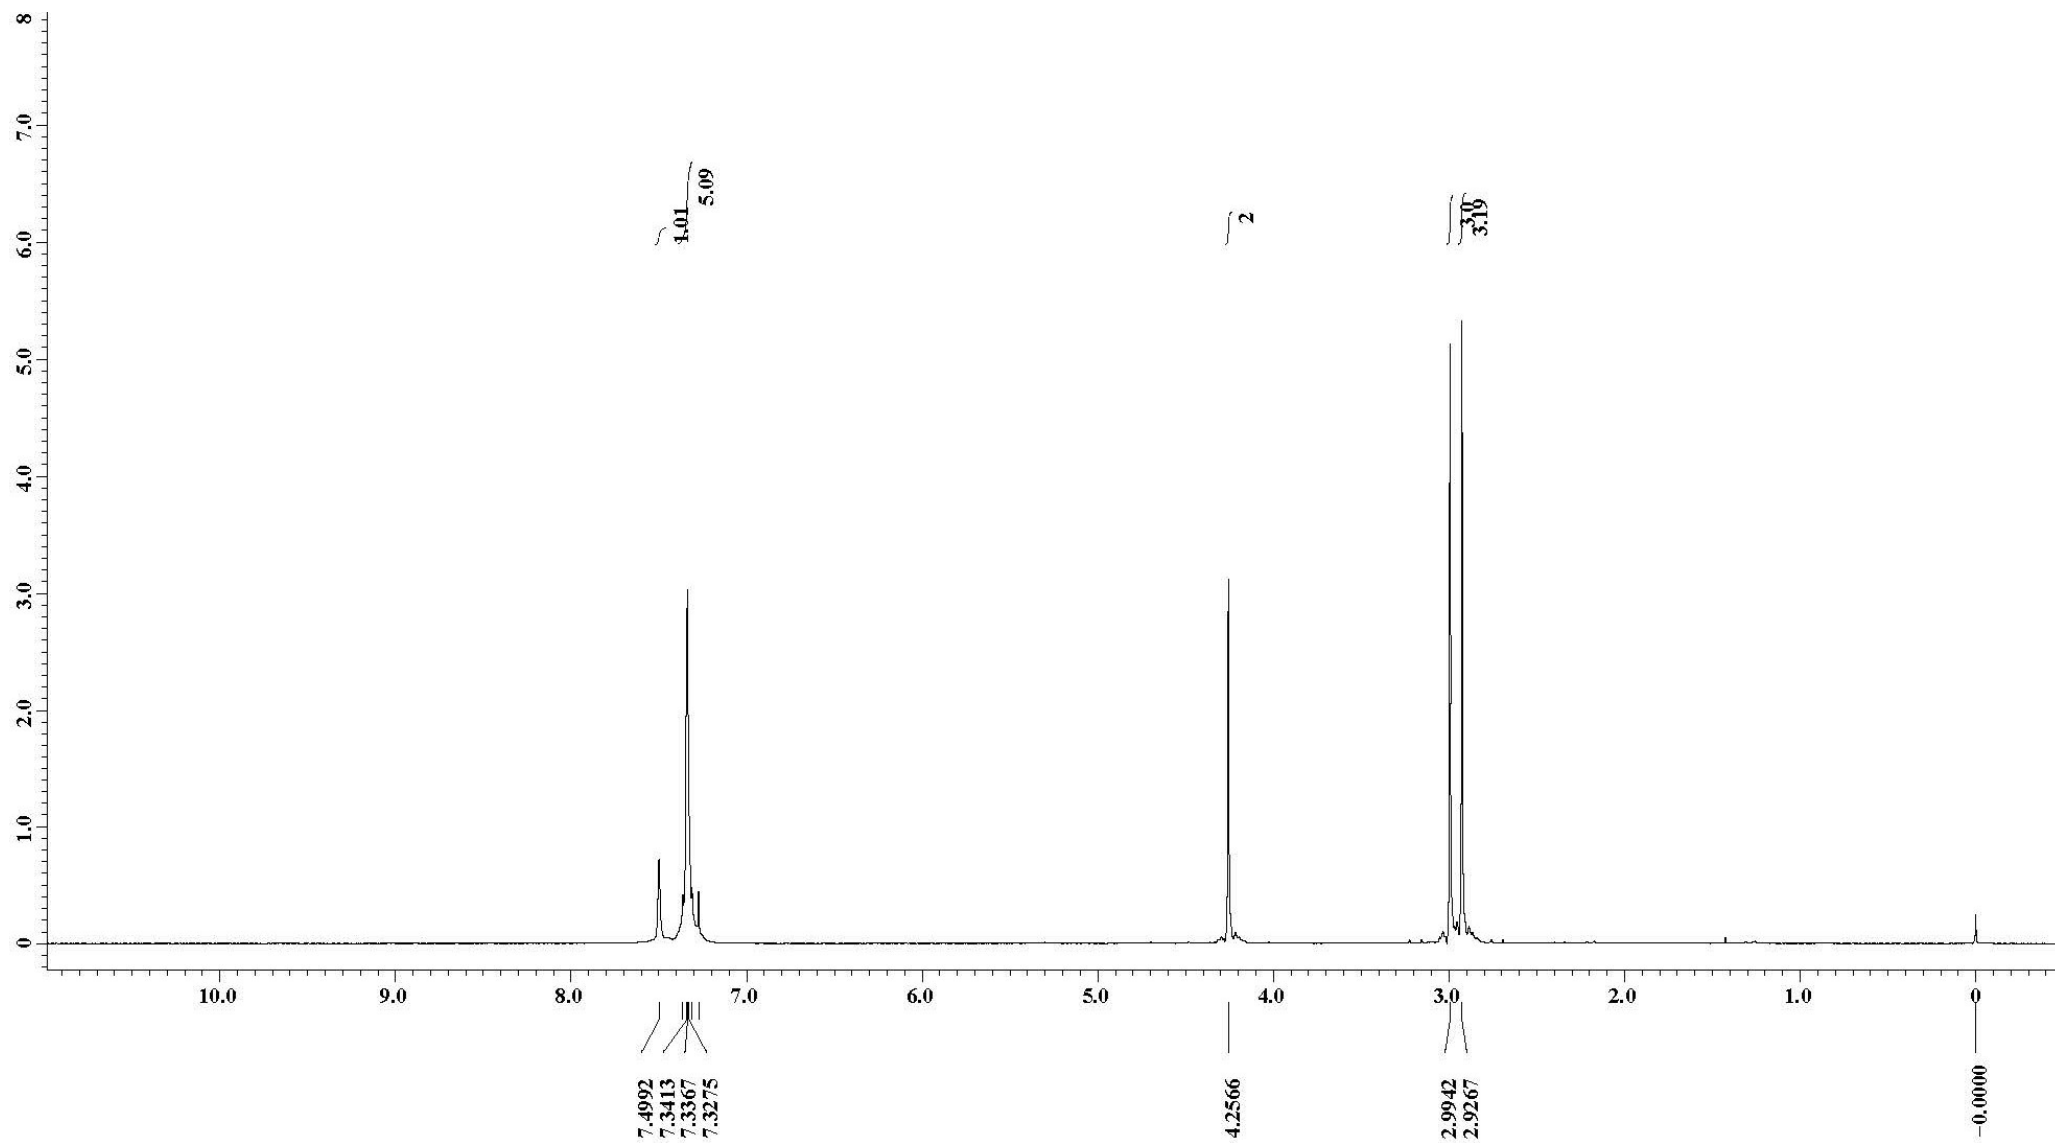



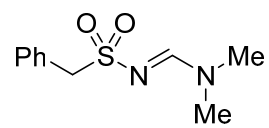

**12s**,  $^{13}\text{C}$  NMR (75 MHz,  $\text{CDCl}_3$ )

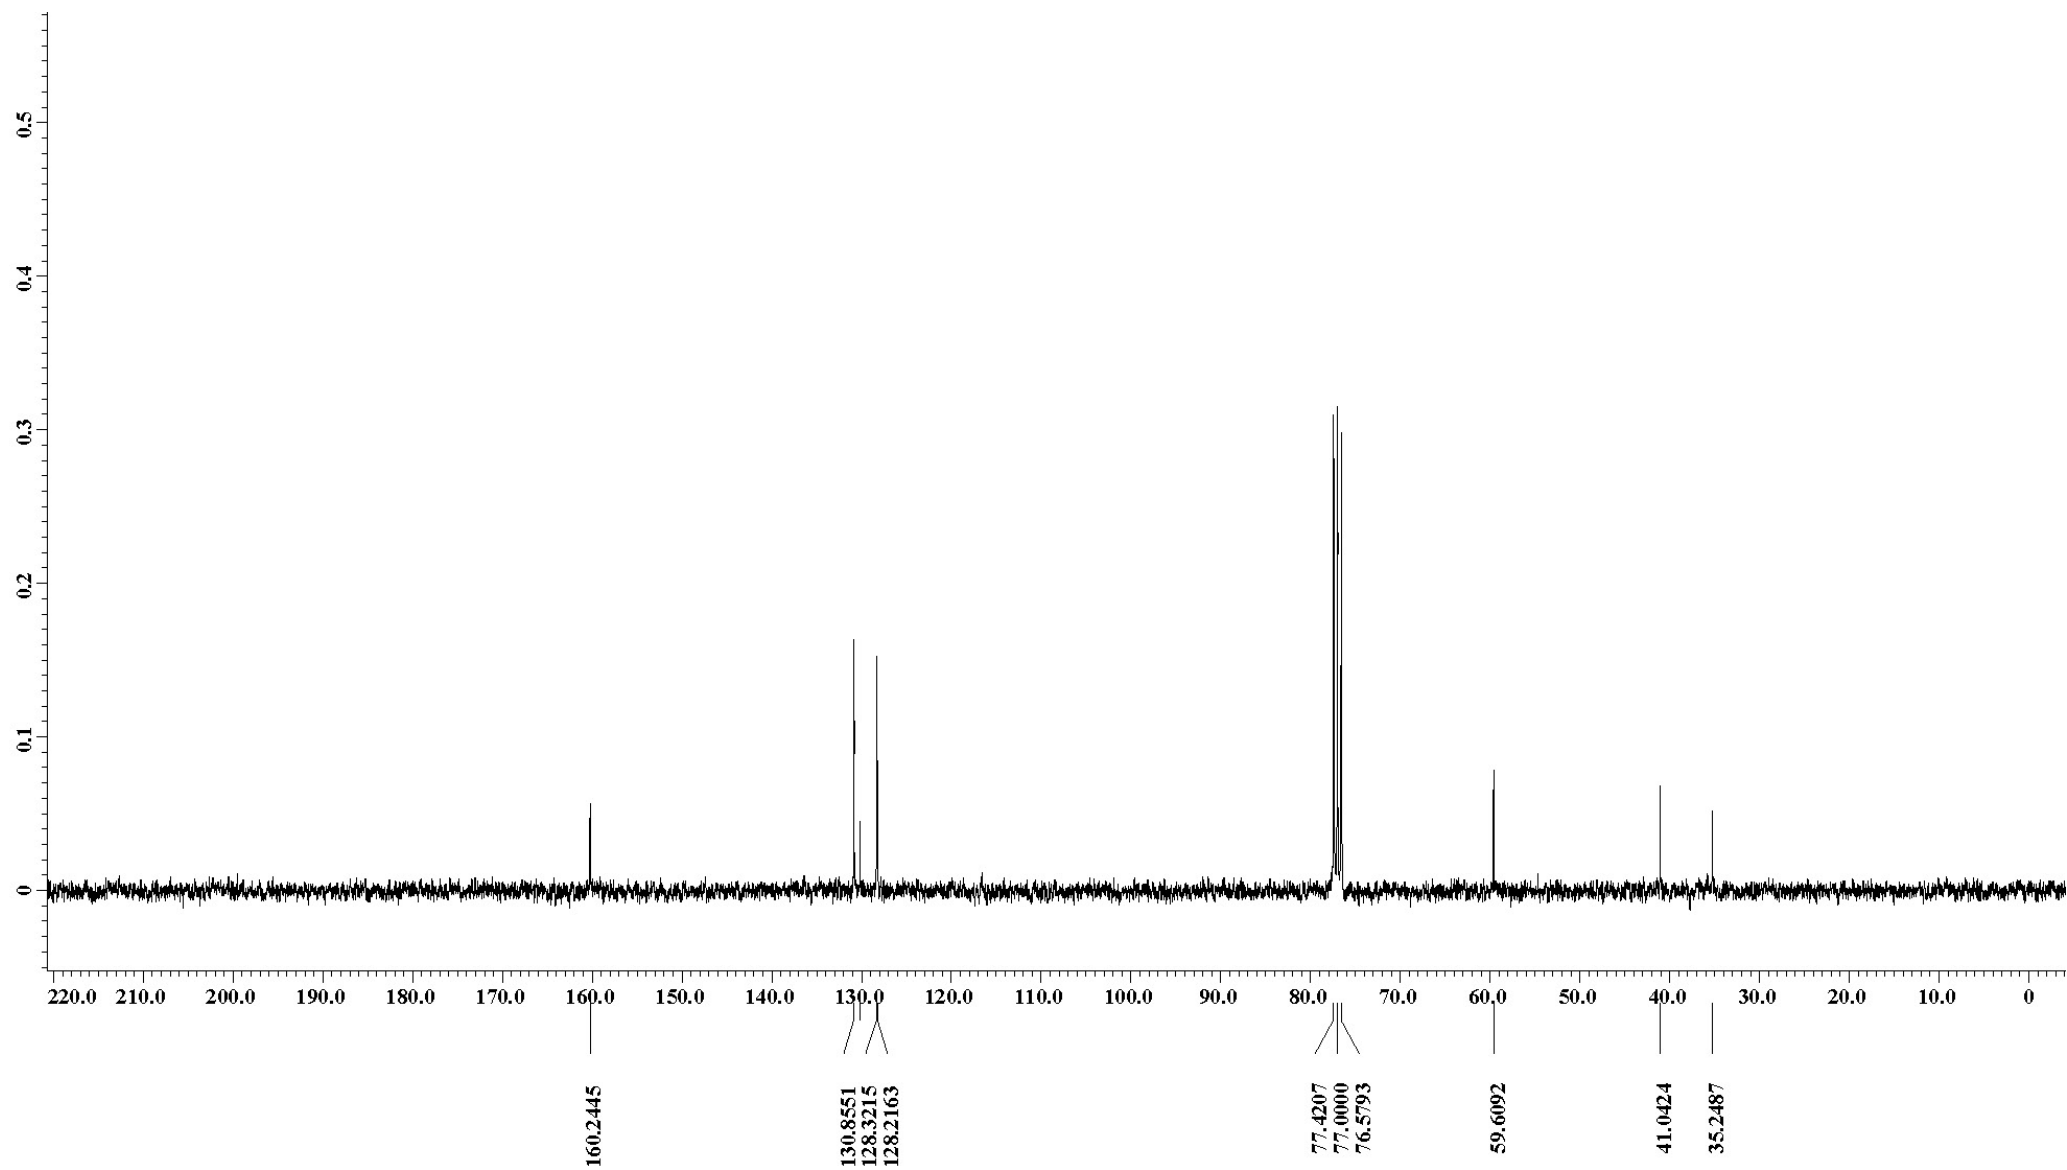

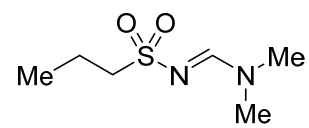

**12t**,  $^1\text{H}$  NMR (300 MHz,  $\text{CDCl}_3$ )

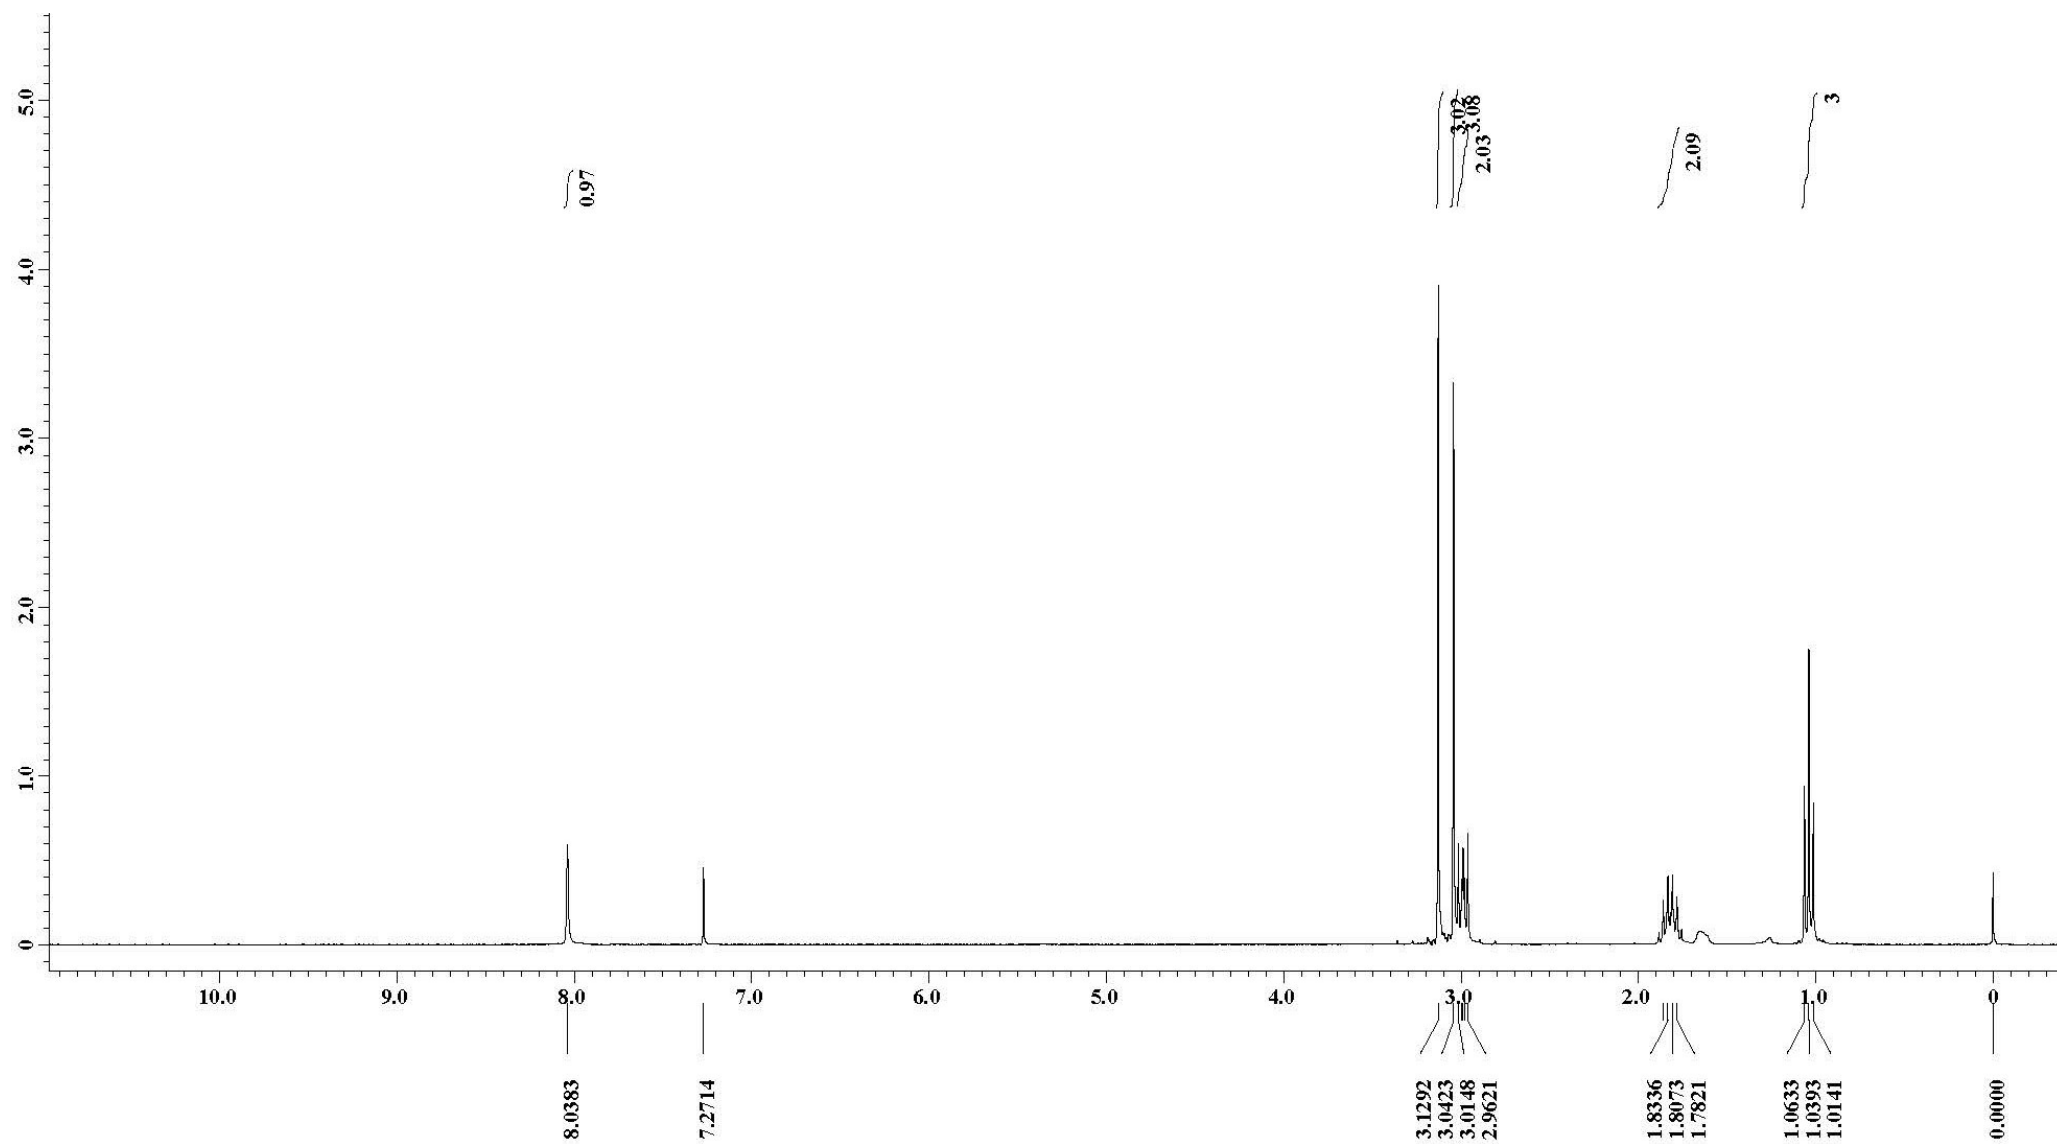

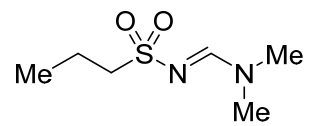

**12t**,  $^{13}\text{C}$  NMR (75 MHz,  $\text{CDCl}_3$ )

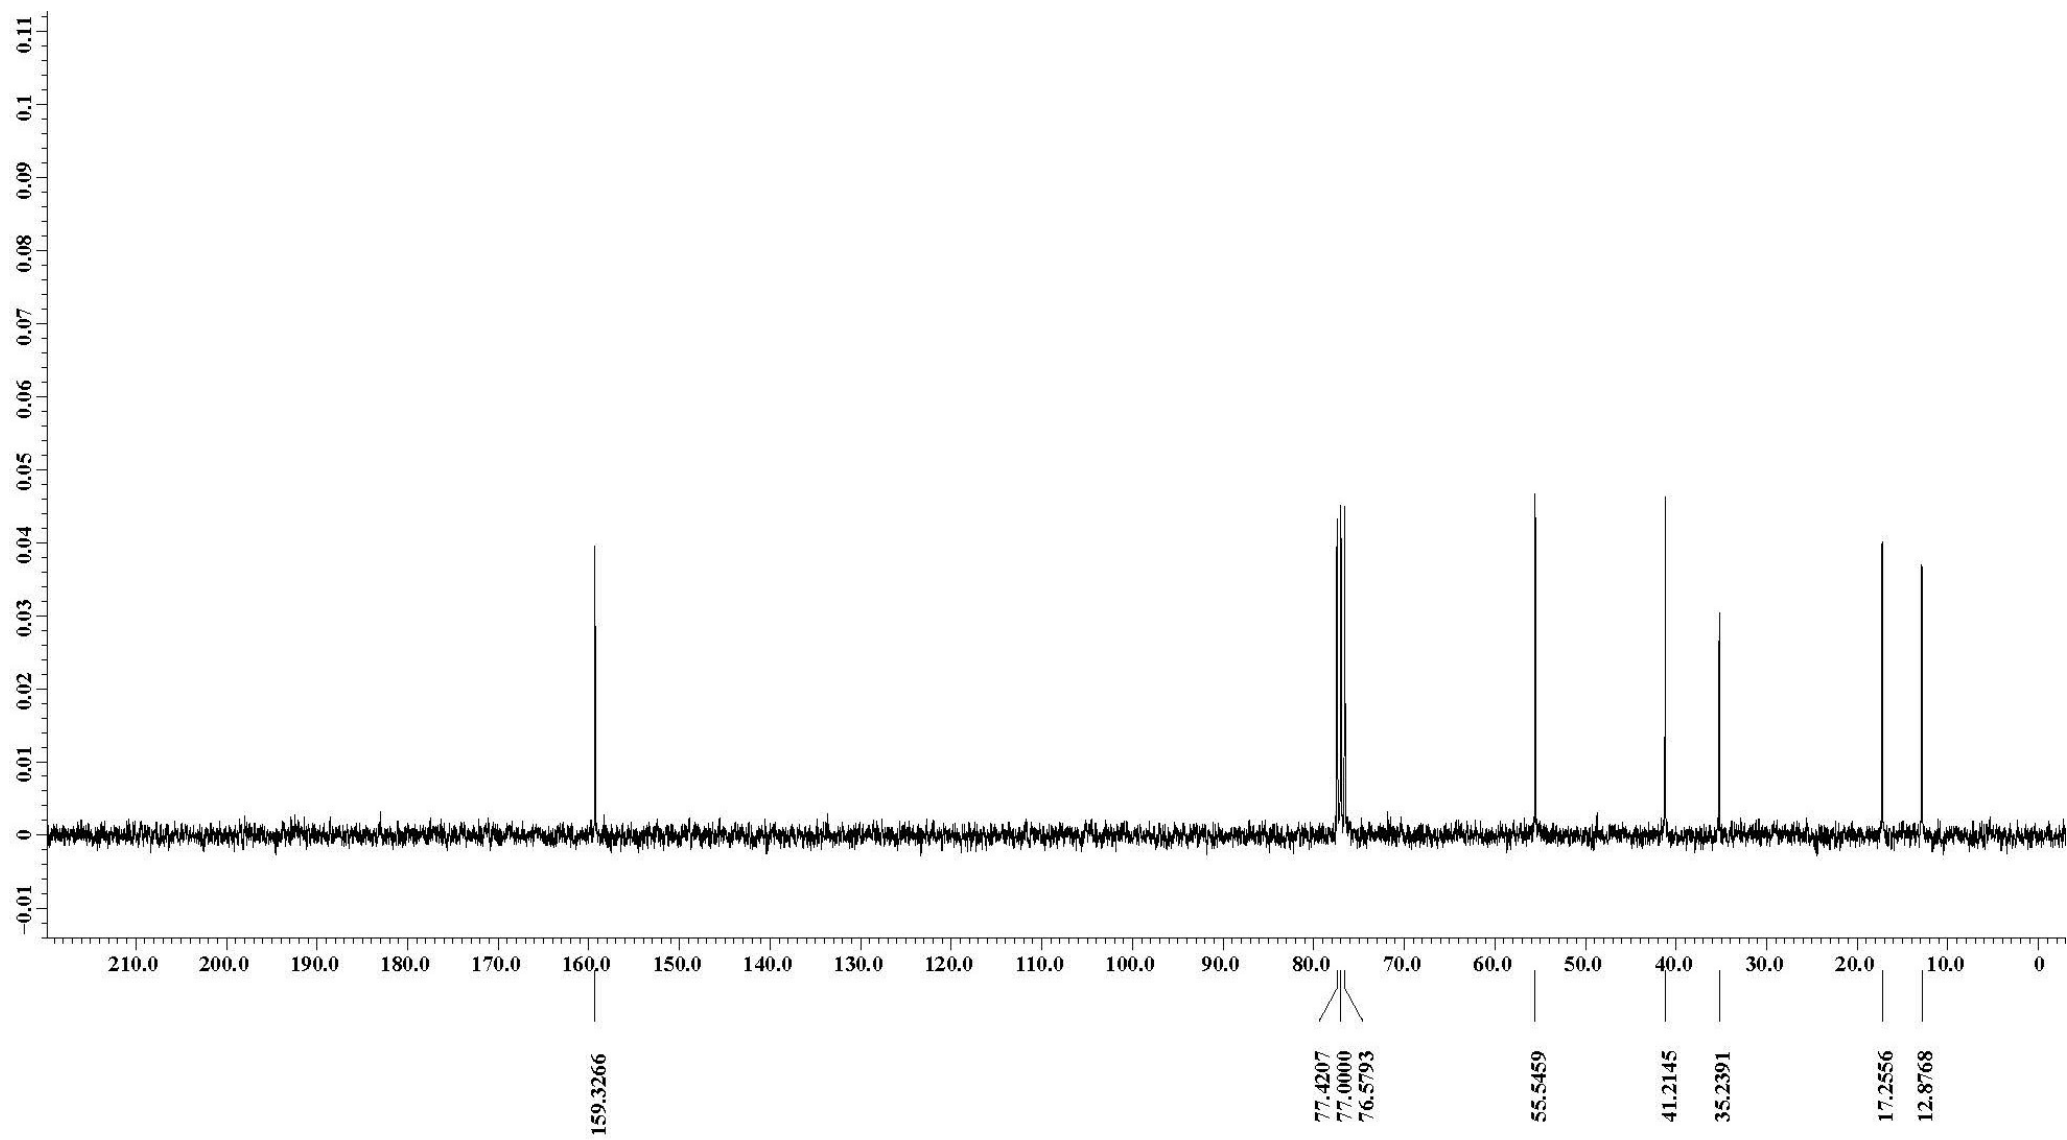

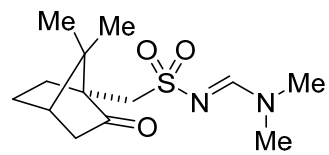

**12u**,  $^1\text{H}$  NMR (300 MHz,  $\text{CDCl}_3$ )

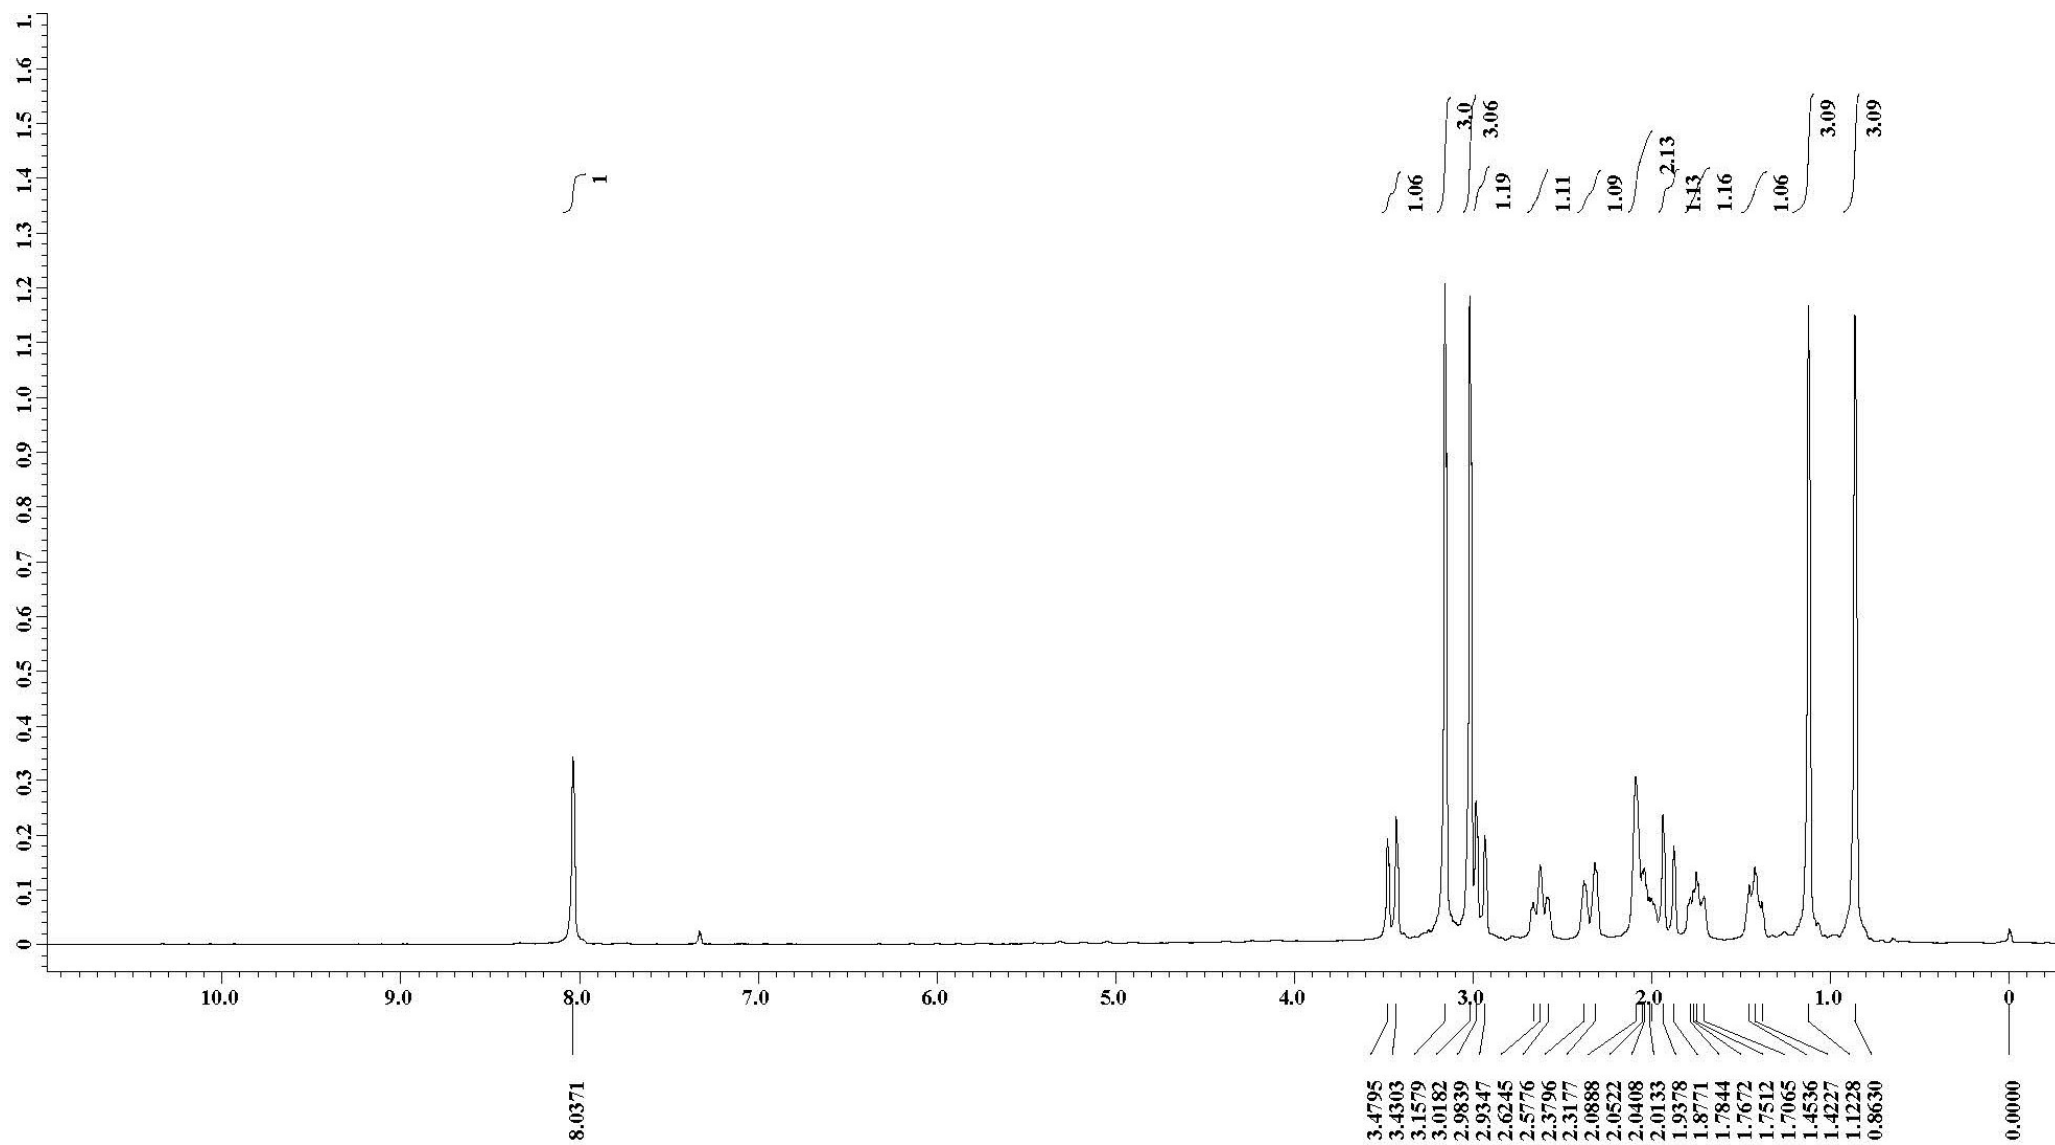

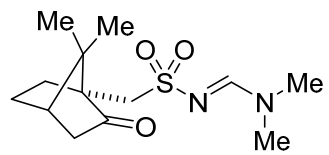

**12u**,  $^{13}\text{C}$  NMR (75 MHz,  $\text{CDCl}_3$ )

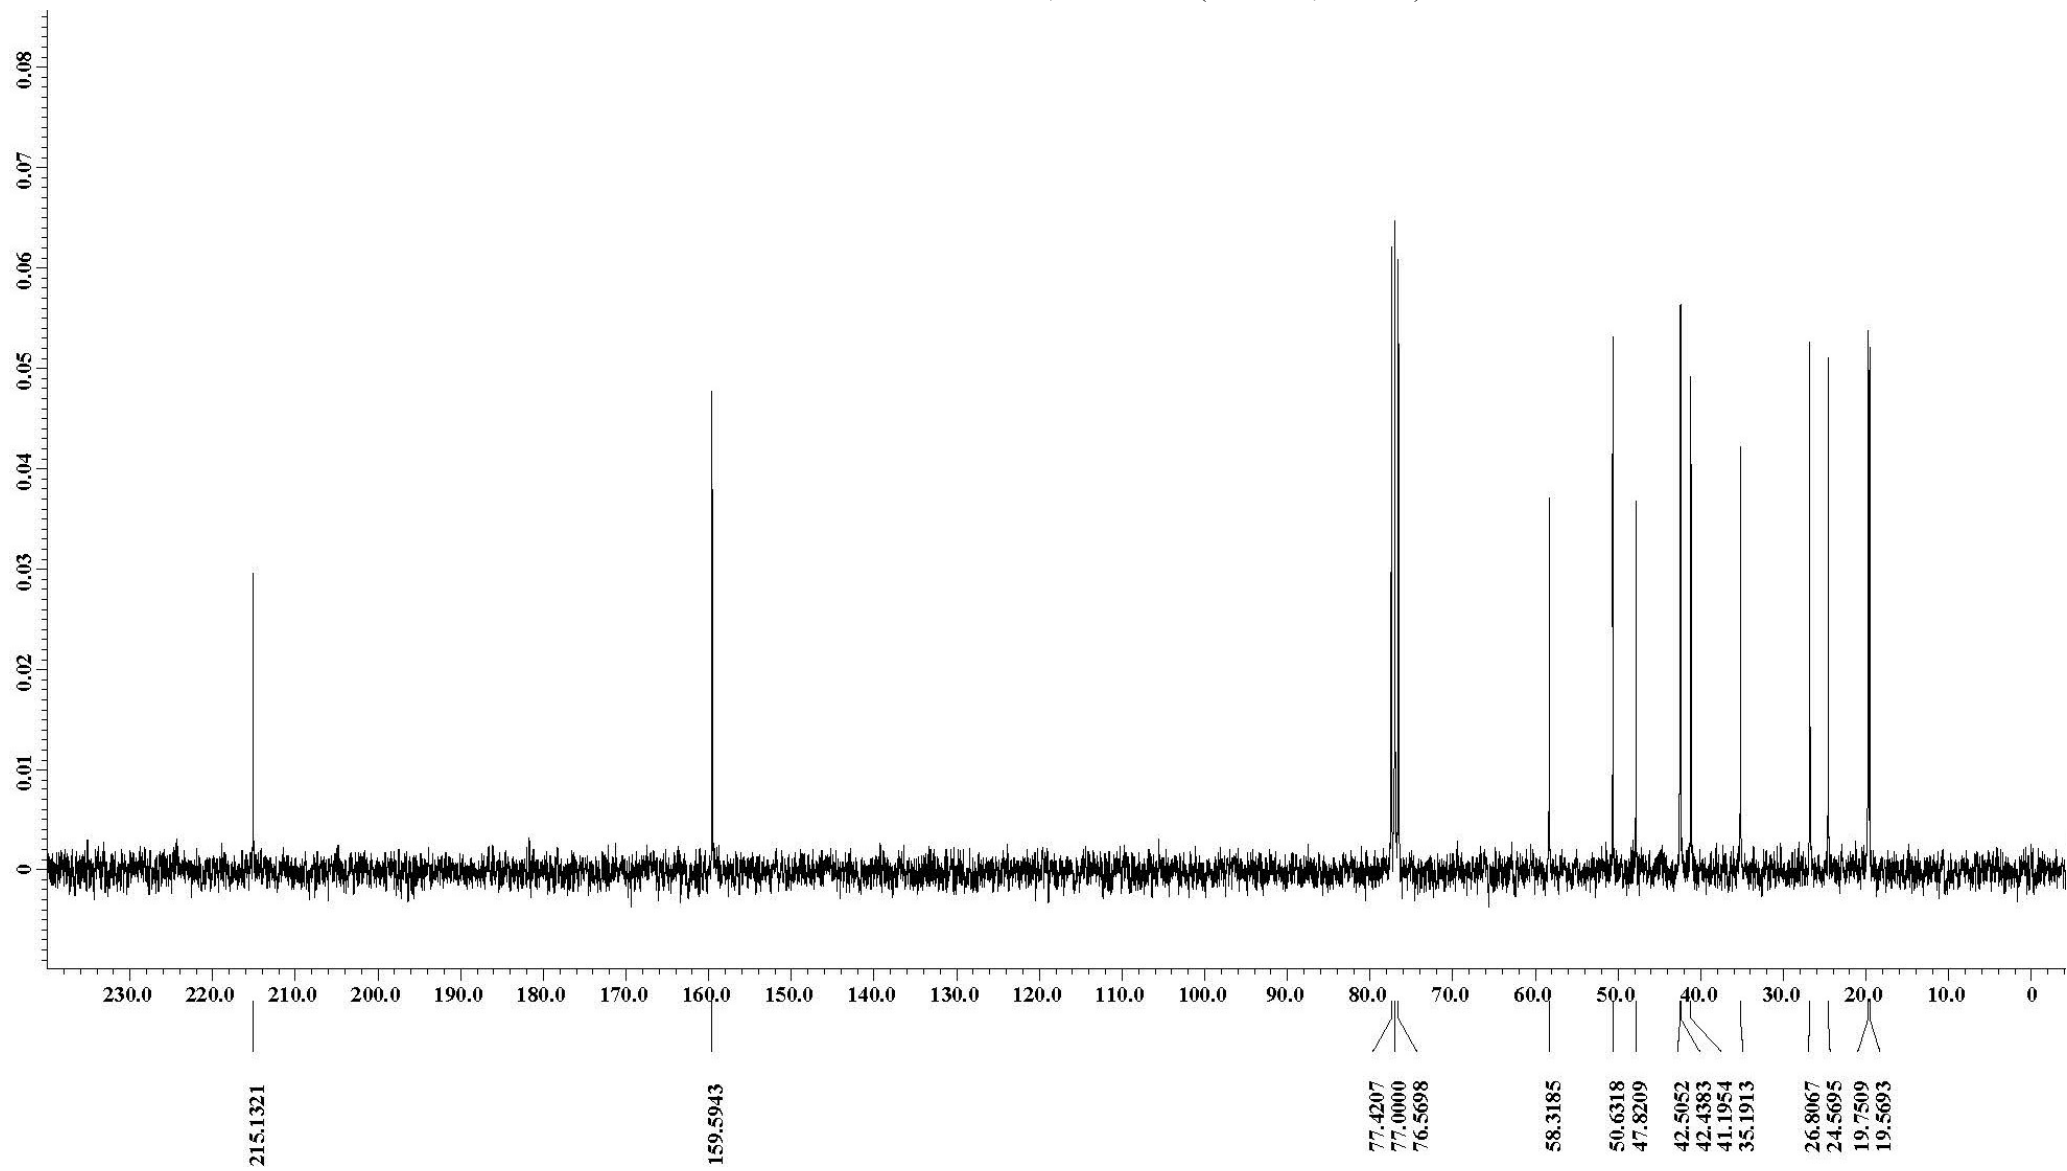

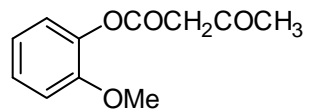

**14**,  $^1\text{H}$  NMR (300 MHz,  $\text{CDCl}_3$ )

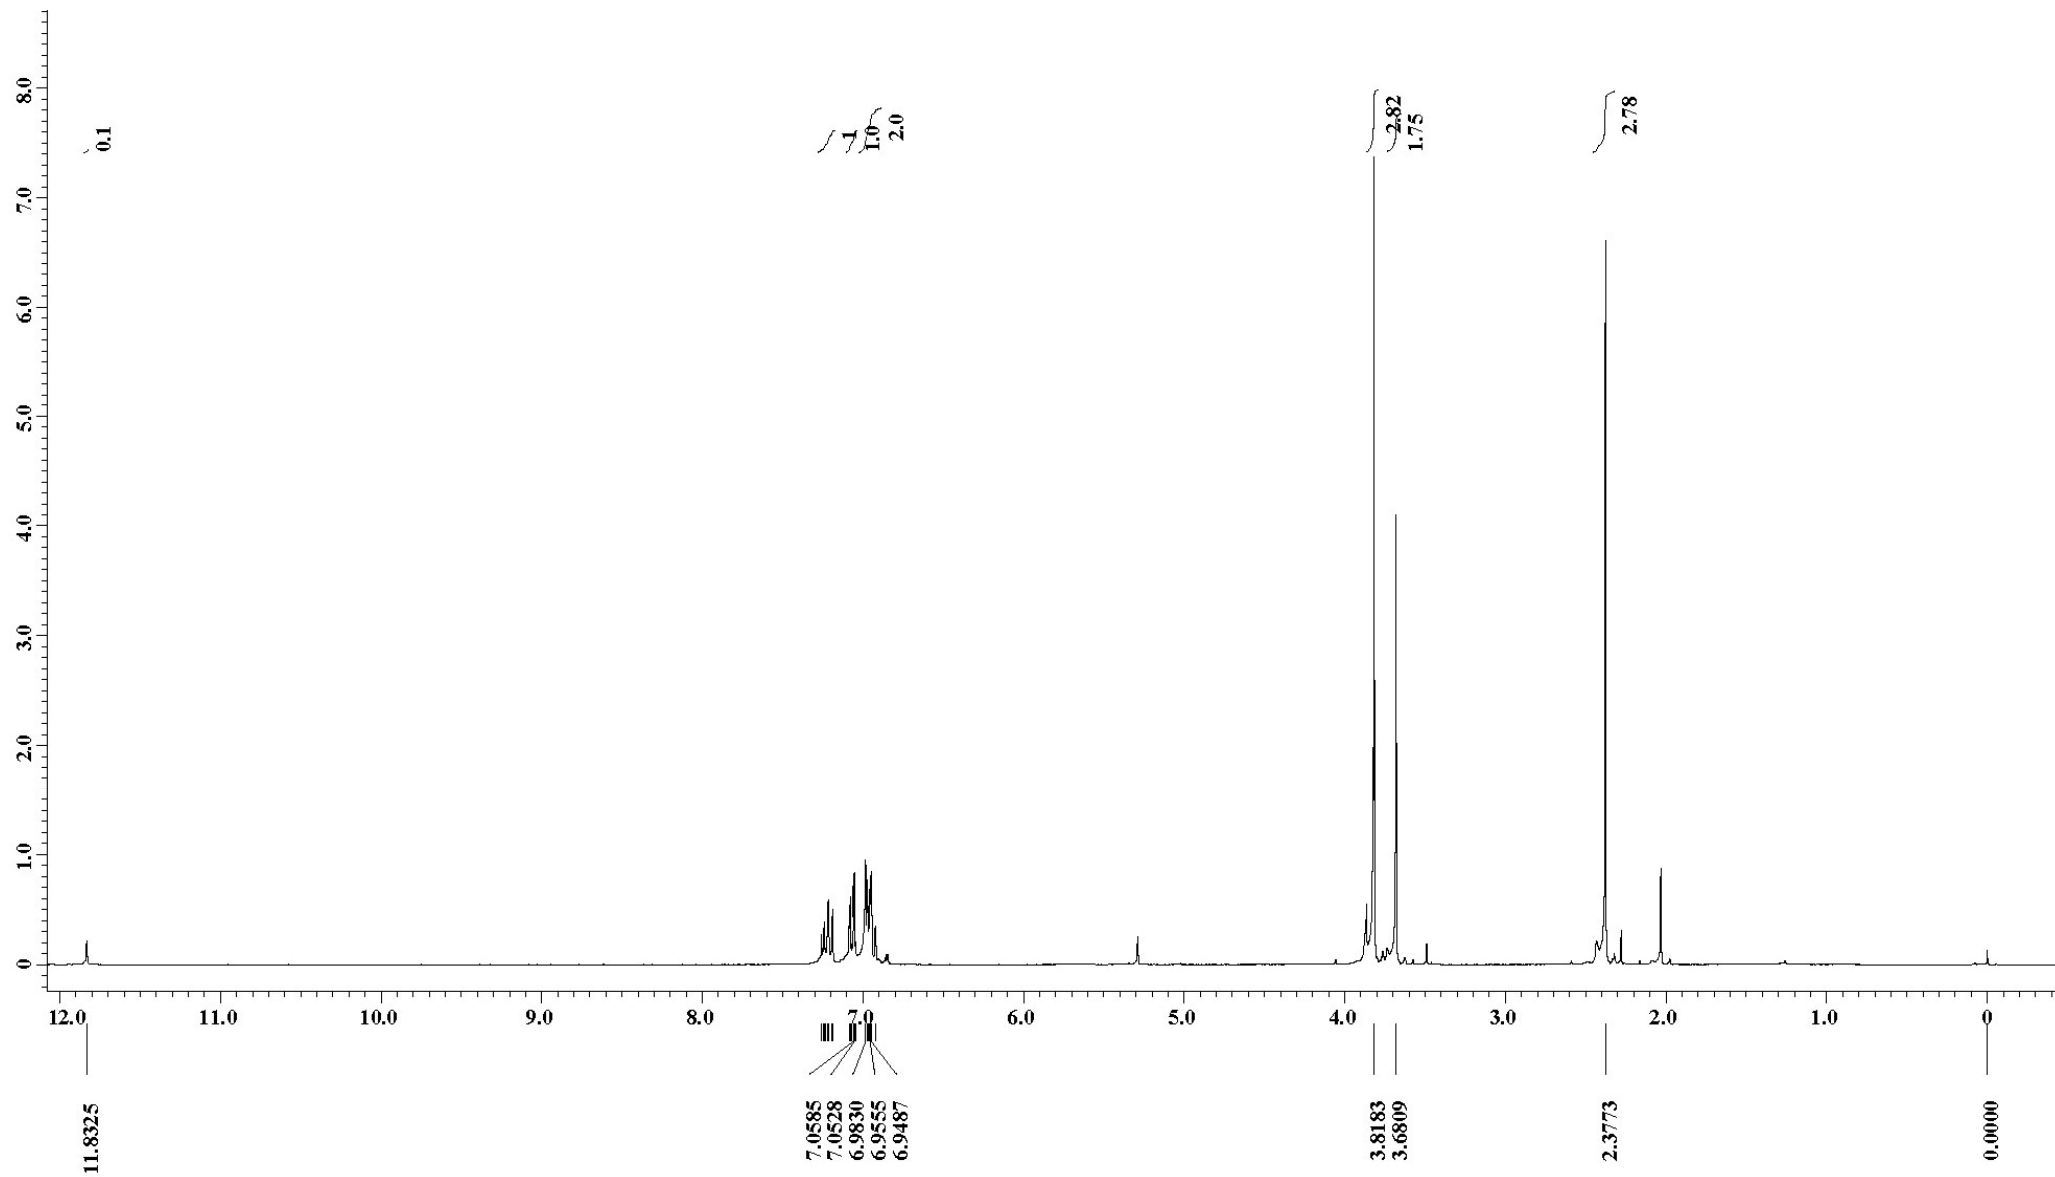

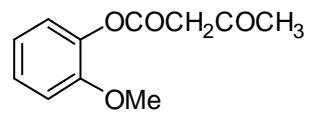

**14**, <sup>13</sup>C NMR (75 MHz, CDCl<sub>3</sub>)

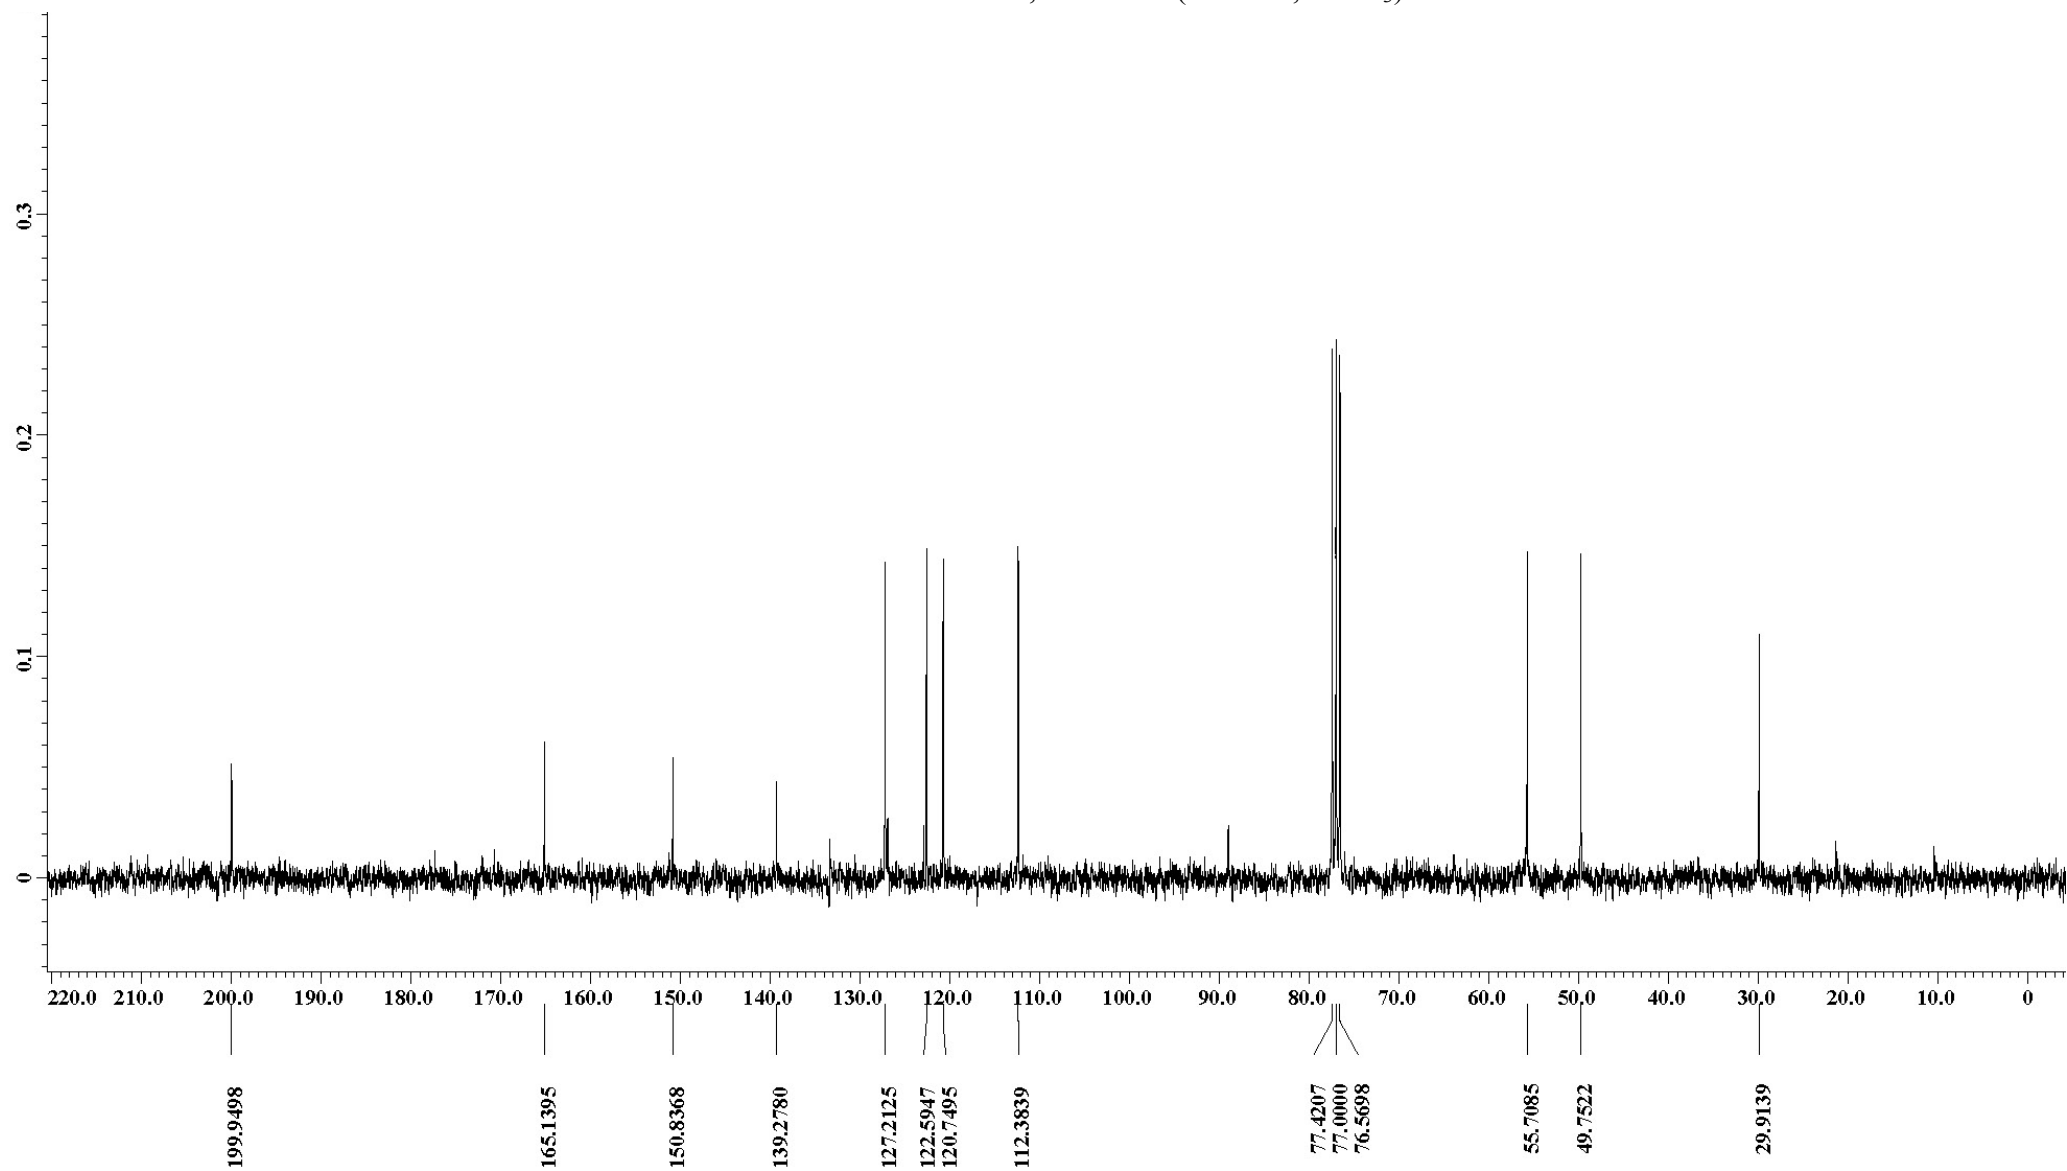

Supplement: c8cc04699a1.pdf [file c8cc04699a1.pdf]
